# Supplementary material for: Causal effect heterogeneity estimation using summary statistics
Source: Research Square preprint supplement (doi:10.21203/rs.3.rs-8589460/v1), 2026-01-14
Supplement: Supplementary file 1 [file d3e0b57c03141352cdd43566.xlsx]

## Sheet: Index
Table	Contents
Table S1	GWAS summary-level data used in real data analysis
Table S2	Main results of negative control and positive control
Table S3	Sensitivity analysis of MERLIN in BMI-BMI (negative control)
Table S4	Sensitivity analysis of MERLIN in WHR-WHR (negative control)
Table S5	Sensitivity analysis of MERLIN in BMI-Testosterone (positive control)
Table S6	GWAS Summary-level data of brain IDPs
Table S7	LDSC-based genetic correlation of SCZ and IDPs
Table S8	Forward Mendelian randomization results (IDPs on SCZ)
Table S9	Reverse Mendelian randomization results (SCZ on IDPs)
Table S10	Sex-stratified Mendelian randomization results for SCZ-IDP.0664 and SCZ-IDP.0015
Table S11	Sensitivity analysis of MERLIN in SCZ-IDP.0664
Table S12	Sensitivity analysis of MERLIN in SCZ-IDP.0015
Table S13	Main results of testosterone on multiple neuropsychiatric disorders
Table S14	Sensitivity analysis of MERLIN in Testosterone-BD
Table S15	Main results of metabolic biomarkers on CAD
Table S16	Sensitivity analysis of MERLIN in BMI-CAD
Table S17	Logistic Regression Analysis for CAD Risk

## Sheet: Table S1
Supplementary Table 1: GWAS summary-level data used in real data analysis
Analysis	Phenotype	Abbreviation	Consortium	Sample Size	Male (n)	Female (n)	Ancestry	E(p)	GWAS references	Download website
Negative control	Body mass index	BMI	UKB	452264	206770	245494	European	0.457189	Bernabeu et al., 20211	https://datashare.ed.ac.uk/bitstream/handle/10283/3917/beta.sexcomparison_21001-0.0.tsv.gz?sequence=23&isAllowed=y
			GIANT	133723	60586	73137	European	0.453071	Randall et al, 20132	MALE: https://giant-consortium.web.broadinstitute.org/images/3/30/GIANT_Randall2013PlosGenet_stage1_publicrelease_HapMapCeuFreq_BMI_MEN_N.txt
							European			FEMALE: https://giant-consortium.web.broadinstitute.org/images/8/8d/GIANT_Randall2013PlosGenet_stage1_publicrelease_HapMapCeuFreq_BMI_WOMEN_N.txt
	Waist-to-hip ratio	WHR	UKB	452264	206770	245494	European	0.457189	Bernabeu et al., 20211	https://datashare.ed.ac.uk/bitstream/handle/10283/3917/beta.sexcomparison__48_49_-0.0.tsv.gz?sequence=81&isAllowed=y
			GIANT	210222	93480	116742	European	0.444673	Shungin et al., 20153	MALE: https://giant-consortium.web.broadinstitute.org/images/f/fd/GIANT_2015_WHR_MALES_EUR.txt.gz
										FEMALE: https://giant-consortium.web.broadinstitute.org/images/d/de/GIANT_2015_WHR_FEMALES_EUR.txt.gz
Positive control	Body mass index	BMI	GIANT	324870	152893	171977	European (major)	0.470628	Locke, A. E. et al.4	MALE: https://giant-consortium.web.broadinstitute.org/images/7/7b/Men_SNP_gwas_mc_merge_nogc.tbl.uniq.gz
										FEMALE: https://giant-consortium.web.broadinstitute.org/images/0/0d/Women_SNP_gwas_mc_merge_nogc.tbl.uniq.gz
	Testosterone	/	UKB	361194	167020	194174	European	0.462411	Neale Lab5	MALE: https://broad-ukb-sumstats-us-east-1.s3.amazonaws.com/round2/additive-tsvs/30850_irnt.gwas.imputed_v3.male.varorder.tsv.bgz -O 30850_irnt.gwas.imputed_v3.male.varorder.tsv.bgz
										FEMALE: https://broad-ukb-sumstats-us-east-1.s3.amazonaws.com/round2/additive-tsvs/30850_irnt.gwas.imputed_v3.female.varorder.tsv.bgz -O 30850_irnt.gwas.imputed_v3.female.varorder.tsv.bgz
SCZ-brain IDPs	Schizophrenia	SCZ	PGC	62068	26600	35468	European	0.428562	Blokland et al., 20226	ftp://ftp.biostat.wisc.edu/pub/lu_group/Projects/Temp/GWAS
	Brain imaging-derived phenotypes	IDPs	UKB	22138	10514	11624	European	0.47493	Smith et al., 20217	https://open.win.ox.ac.uk/ukbiobank/big40/
Testosterone–neuropsychiatric disorders	Testosterone	/	UKB	392548	197921	194627	European	0.504196	Kiewa, J. et al., 20248	MALE: https://ftp.ebi.ac.uk/pub/databases/gwas/summary_statistics/GCST90319001-GCST90320000/GCST90319648/GCST90319648.tsv.gz
										FEMALE: https://ftp.ebi.ac.uk/pub/databases/gwas/summary_statistics/GCST90319001-GCST90320000/GCST90319620/GCST90319620.tsv.gz
	Bipolar disorder	BD	PGC	45881	24978	20903	European	0.544408	Blokland et al., 20226	ftp://ftp.biostat.wisc.edu/pub/lu_group/Projects/Temp/GWAS
	Major depressive disorder	MDD	PGC	38703	22456	16247	European	0.580213	Blokland et al., 20226
	Major depressive disorder recurrent	MDDR	PGC	25780	14975	10805	European	0.580877	Blokland et al., 20226
	Obsessive-compulsive disorder	OCD	PGC	9870	5832	4038	European	0.590881	Khramtsova et al., 20199
	Posttraumatic stress disorder	PTSD	PGC	8035	3425	4610	European	0.42626	Duncan et al., 201810
	Schizophrenia	SCZ	PGC	62068	26600	35468	European	0.428562	Blokland et al., 20226
Metabolic biomarkers - CAD	Body mass index	BMI	UKB	424044	/		European	/	Winkler et al., 202411	https://zenodo.org/records/14141226/files/bmi.full.forpub.txt.gz?download=1
	Diastolic blood pressure	DBP	UKB	388409	/		European	/	Winkler et al., 202411	https://zenodo.org/records/14141226/files/dbp.full.forpub.txt.gz?download=1
	Low-density lipoprotein	LDL	UKB	404900	/		European	/	Winkler et al., 202411	https://zenodo.org/records/14141226/files/ldl.full.forpub.txt.gz?download=1
	Systolic blood pressure	SBP	UKB	388400	/		European	/	Winkler et al., 202411	https://zenodo.org/records/14141226/files/sbp.full.forpub.txt.gz?download=1
	Triglycerides	TG	UKB	405326	/		European	/	Winkler et al., 202411	https://zenodo.org/records/14141226/files/tg_ln.full.forpub.txt.gz?download=1
	Coronary artery disease	CAD	AllofUs	247968	/		European	/	/	GWAS: https://uwmadison.app.box.com/s/8snhq7jg4bkr2gdefhtp9l2fczwwen79
										GWIS(xAge): https://uwmadison.app.box.com/s/10feqt2rfiojzti4qx5yjrc5t7ik1hkq
Abbreviation: UK Biobank (UKB); The Genetic Investigation of ANthropometric Traits (GIANT); All of Us Research Program (AllofUs); Psychiatric Genomics Consortium (PGC)
E(p) = Male (n) / (Male (n) + Female (n))
Reference number	Citation
1	Bernabeu, E. et al. Sex differences in genetic architecture in the UK Biobank. Nat Genet 53, 1283–1289 (2021). https://doi.org/10.1038/s41588-021-00912-0
2	Randall, J. C. et al. Sex-stratified genome-wide association studies including 270,000 individuals show sexual dimorphism in genetic loci for anthropometric traits. PLoS Genet. 9, e1003500 (2013). https://doi.org/10.1371/journal.pgen.1003500
3	Shungin, D. et al. New genetic loci link adipose and insulin biology to body fat distribution. Nature 518, 187–196 (2015). https://doi.org/10.1038/nature14132
4	Locke, A. E. et al. Genetic studies of body mass index yield new insights for obesity biology. Nature 518, 197–206 (2015). https://doi.org/10.1038/nature14177
5	Neale Lab. (2018, August 1). UK Biobank GWAS Round 2 Results. http://www.nealelab.is/uk-biobank
6	Blokland, G. A. M. et al. Sex-dependent shared and nonshared genetic architecture across mood and psychotic disorders. Biol. Psychiatry 91, 102–117 (2022). https://doi.org/10.1016/j.biopsych.2021.02.972
7	Smith, S.M. et al. An expanded set of genome-wide association studies of brain imaging phenotypes in UK Biobank. Nat Neurosci 24, 737–745 (2021). https://doi.org/10.1038/s41593-021-00826-4
8	Kiewa, J. et al. Comprehensive sex-stratified genetic analysis of 28 blood biomarkers and depression reveals a significant association between depression and low levels of total protein in females. Complex Psychiatry 10, 19–34 (2024). https://doi.org/10.1159/000538058
9	Khramtsova, E. A. et al. Sex differences in the genetic architecture of obsessive-compulsive disorder. Am J Med Genet B Neuropsychiatr Genet 180, 351–364 (2019). https://doi.org/10.1002/ajmg.b.32687
10	Duncan, L.et al. Largest GWAS of PTSD (N=20 070) yields genetic overlap with schizophrenia and sex differences in heritability. Mol Psychiatry 23, 666–673 (2018). https://doi.org/10.1038/mp.2017.77
11	Winkler, T. W. et al. Genetic-by-age interaction analyses on complex traits in UK Biobank and their potential to identify effects on longitudinal trait change. Genome Biol. 25, 300 (2024). https://doi.org/10.1186/s13059-024-03439-9

## Sheet: Table S2
Supplementary Table 2: Main negative and positive control results
Note: For negative control, original sex-stratified UKB GWAS data were scaled by dividing estimates by the standard deviation of UKB samples to ensure consistency with GIANT GWAS
Exposure	Outcome	Setting	IVW, MR-Egger, RAPS										MR-LDP				MERLIN
			N.snps	IVW.beta	IVW.se	IVW.pval	Egger.beta	Egger.se	Egger.pval	Raps.beta	Raps.se	Raps.pval	N.snps	LDP.beta	LDP.se	LDP.pval	N.snps	betaA	betaA.se	betaA.pval	betaI	betaI.se	betaI.pval
Negative control
BMI.UKB	BMI.GIANT	Average	376	0.967595	0.0383925	0	0.9203	0.0632	0	0.99824	0.0311102	0	899	1.00121	0.0283654	6.54478e-273	903	0.993525	0.02138	0	0.005376	0.016217	0.740247
		Male	105	0.99615	0.0456152	1.00836e-105	1.40683	0.115105	9.13372e-22	1.01887	0.0422345	0	196	1.02789	0.0607879	3.83301e-64	/
		Female	151	1.00508	0.0411589	1.06177e-131	1.5505	0.101909	3.87415e-32	1.02967	0.037522	0	297	1.05998	0.0507882	9.92499e-97
WHR.UKB	WHR.GIANT	Average	184	1.00089	0.0363422	5.70816e-167	1.04708	0.0995	0	1.02089	0.0352079	0	406	1.04015	0.0408445	4.68135e-143	424	1.00223	0.033426	1.6e-197	-0.00686	0.02647	0.57464
		Male	38	0.999249	0.0674625	1.22685e-49	1.48992	0.211893	2.98503e-08	1.01656	0.0626554	0	60	1.06337	0.105089	4.56116e-24	/
		Female	126	0.995666	0.0327112	1.72197e-203	1.28089	0.0850682	8.95094e-30	1.01095	0.0300845	0	271	1.03959	0.0393704	1.18953e-153
Positive control
BMI	Testosterone	Average	131	-0.04385	0.018122	0.015527	-0.0624	0.03527	0.076859	-0.04669	0.011085	2.53e-05	203	-0.05838	0.014112	3.52e-05	205	-0.05124	0.019412	0.008298	-0.13794	0.008889	2.62e-54
		Male	33	-0.23412	0.043538	7.56e-08	-0.24219	0.041825	7.01538e-09	-0.25322	0.020054	0	50	-0.2052	0.037909	6.2e-08	/
		Female	41	0.059116	0.028886	0.040701	0.03874	0.030064	0.197543	0.061652	0.017641	0.000474	66	0.038218	0.021767	0.079125

## Sheet: Table S3
Supplementary Table 3: Sensitivity analysis of MERLIN in BMI–BMI (negative control)
Exposure	Outcome	r2	gwas.p	gwis.p	N.snps	betaA	betaA.se	betaA.pval	betaA.LCL	betaA.UCL	betaI	betaI.se	betaI.pval	betaI.LCL	betaI.UCL
BMI.UKB	BMI.GIANT	0.01	5e-08	5e-06	378	0.958742	0.033986	6.03e-161	0.892129	1.02535	0.014493	0.023781	0.542248	-0.0321178	0.0611038
BMI.UKB	BMI.GIANT	0.01	5e-08	1e-05	381	0.954621	0.033467	1.91e-164	0.889026	1.02022	0.015764	0.023738	0.506642	-0.0307625	0.0622905
BMI.UKB	BMI.GIANT	0.01	5e-08	5e-05	410	0.937793	0.033387	4.61e-154	0.872354	1.00323	0.011016	0.023201	0.634917	-0.034458	0.05649
BMI.UKB	BMI.GIANT	0.01	1e-07	5e-06	426	0.957307	0.032018	1.6e-180	0.894552	1.02006	0.017863	0.022883	0.435021	-0.0269877	0.0627137
BMI.UKB	BMI.GIANT	0.01	1e-07	1e-05	429	0.953626	0.032868	4.72e-170	0.889205	1.01805	0.017331	0.023019	0.451506	-0.0277862	0.0624482
BMI.UKB	BMI.GIANT	0.01	1e-07	5e-05	458	0.937781	0.032348	4.4e-165	0.874379	1.00118	0.015512	0.023272	0.505049	-0.0301011	0.0611251
BMI.UKB	BMI.GIANT	0.01	5e-07	5e-06	557	0.948606	0.029021	1.67e-210	0.891725	1.00549	0.013647	0.021382	0.523292	-0.0282617	0.0555557
BMI.UKB	BMI.GIANT	0.01	5e-07	1e-05	560	0.946748	0.02783	8.45e-228	0.892201	1.00129	0.014337	0.022226	0.518878	-0.029226	0.0579
BMI.UKB	BMI.GIANT	0.01	5e-07	5e-05	586	0.979014	0.028007	3.2e-216	0.92412	1.03391	0.013305	0.021104	0.528396	-0.0280588	0.0546688
BMI.UKB	BMI.GIANT	0.1	5e-08	5e-06	560	0.992988	0.027107	9.4e-271	0.939858	1.04612	0.01624	0.020774	0.434359	-0.024477	0.056957
BMI.UKB	BMI.GIANT	0.1	5e-08	1e-05	564	0.988503	0.028732	5.52e-239	0.932188	1.04482	0.017833	0.020028	0.373255	-0.0214219	0.0570879
BMI.UKB	BMI.GIANT	0.1	5e-08	5e-05	595	0.968387	0.027807	2.17e-244	0.913885	1.02289	0.016924	0.020254	0.403392	-0.0227738	0.0566218
BMI.UKB	BMI.GIANT	0.1	1e-07	5e-06	626	0.952206	0.025477	9.87e-293	0.902271	1.00214	0.015642	0.019071	0.412096	-0.0217372	0.0530212
BMI.UKB	BMI.GIANT	0.1	1e-07	1e-05	630	0.949976	0.025729	2.03e-294	0.899547	1.0004	0.016557	0.019653	0.399529	-0.0219629	0.0550769
BMI.UKB	BMI.GIANT	0.1	1e-07	5e-05	661	0.969282	0.026112	2.14e-277	0.918102	1.02046	0.015467	0.019965	0.438503	-0.0236644	0.0545984
BMI.UKB	BMI.GIANT	0.1	5e-07	5e-06	829	0.964897	0.023669	0	0.918506	1.01129	0.009852	0.01792	0.582463	-0.0252712	0.0449752
BMI.UKB	BMI.GIANT	0.1	5e-07	1e-05	833	0.962993	0.023798	0	0.916349	1.00964	0.010367	0.017855	0.561502	-0.0246288	0.0453628
BMI.UKB	BMI.GIANT	0.1	5e-07	5e-05	864	0.959458	0.022984	0	0.914409	1.00451	0.008642	0.017227	0.615905	-0.0251229	0.0424069
BMI.UKB	BMI.GIANT	0.3	5e-08	5e-06	903	0.993525	0.02138	0	0.95162	1.03543	0.005376	0.016217	0.740247	-0.0264093	0.0371613
BMI.UKB	BMI.GIANT	0.3	5e-08	1e-05	907	0.981824	0.021866	0	0.938967	1.02468	0.006583	0.016194	0.684386	-0.0251572	0.0383232
BMI.UKB	BMI.GIANT	0.3	5e-08	5e-05	941	0.974626	0.021687	0	0.932119	1.01713	0.007507	0.01627	0.644524	-0.0243822	0.0393962
BMI.UKB	BMI.GIANT	0.3	1e-07	5e-06	1008	0.988572	0.020733	0	0.947935	1.02921	0.00892	0.015745	0.57102	-0.0219402	0.0397802
BMI.UKB	BMI.GIANT	0.3	1e-07	1e-05	1012	0.986338	0.020347	0	0.946458	1.02622	0.008531	0.015357	0.578549	-0.0215687	0.0386307
BMI.UKB	BMI.GIANT	0.3	1e-07	5e-05	1046	0.979143	0.019968	0	0.940006	1.01828	0.011142	0.015542	0.473447	-0.0193203	0.0416043
BMI.UKB	BMI.GIANT	0.3	5e-07	5e-06	1341	0.971852	0.018714	0	0.935173	1.00853	0.00686	0.014756	0.642035	-0.0220618	0.0357818
BMI.UKB	BMI.GIANT	0.3	5e-07	1e-05	1345	0.971062	0.017684	0	0.936401	1.00572	0.006672	0.014511	0.645661	-0.0217696	0.0351136
BMI.UKB	BMI.GIANT	0.3	5e-07	5e-05	1377	0.966402	0.018494	0	0.930154	1.00265	0.00852	0.014408	0.554283	-0.0197197	0.0367597

## Sheet: Table S4
Supplementary Table 4: Sensitivity analysis of MERLIN in WHR–WHR (negative control)
Exposure	Outcome	r2	gwas.p	gwis.p	N.snps	betaA	betaA.se	betaA.pval	betaA.LCL	betaA.UCL	betaI	betaI.se	betaI.pval	betaI.LCL	betaI.UCL
WHR.UKB	WHR.GIANT	0.01	5e-08	5e-06	192	0.977377	0.049616	2.2e-86	0.88013	1.07462	-0.02231	0.03697	0.546249	-0.0947712	0.0501512
WHR.UKB	WHR.GIANT	0.01	5e-08	1e-05	202	0.947118	0.046891	1.01e-90	0.855212	1.03902	-0.02177	0.036112	0.546696	-0.0925495	0.0490095
WHR.UKB	WHR.GIANT	0.01	5e-08	5e-05	238	0.927744	0.045915	2.76e-86	0.837751	1.01774	-0.03915	0.034271	0.253289	-0.106321	0.0280212
WHR.UKB	WHR.GIANT	0.01	1e-07	5e-06	210	0.960217	0.0448	6.53e-102	0.872409	1.04802	-0.02634	0.035282	0.455267	-0.0954927	0.0428127
WHR.UKB	WHR.GIANT	0.01	1e-07	1e-05	220	0.934972	0.046205	4.79e-91	0.84441	1.02553	-0.02544	0.034358	0.459105	-0.0927817	0.0419017
WHR.UKB	WHR.GIANT	0.01	1e-07	5e-05	256	0.927978	0.042737	8.72e-94	0.844213	1.01174	-0.04172	0.034008	0.219881	-0.108376	0.0249357
WHR.UKB	WHR.GIANT	0.01	5e-07	5e-06	284	0.942663	0.041217	9.06e-116	0.861878	1.02345	-0.02346	0.032255	0.467116	-0.0866798	0.0397598
WHR.UKB	WHR.GIANT	0.01	5e-07	1e-05	293	0.925432	0.041723	5.32e-109	0.843655	1.00721	-0.02135	0.030573	0.485013	-0.0812731	0.0385731
WHR.UKB	WHR.GIANT	0.01	5e-07	5e-05	327	0.93296	0.03786	2.65e-150	0.858754	1.00717	-0.02996	0.030604	0.327606	-0.0899438	0.0300238
WHR.UKB	WHR.GIANT	0.1	5e-08	5e-06	282	0.993146	0.037299	3.31e-156	0.92004	1.06625	-0.01164	0.029494	0.693114	-0.0694482	0.0461682
WHR.UKB	WHR.GIANT	0.1	5e-08	1e-05	292	0.972776	0.037363	1.96e-149	0.899545	1.04601	-0.01132	0.029648	0.702639	-0.0694301	0.0467901
WHR.UKB	WHR.GIANT	0.1	5e-08	5e-05	331	0.940653	0.035855	1.05e-151	0.870377	1.01093	-0.02708	0.031232	0.38582	-0.0882947	0.0341347
WHR.UKB	WHR.GIANT	0.1	1e-07	5e-06	314	0.999688	0.03504	5.01e-179	0.93101	1.06837	-0.01012	0.028952	0.726634	-0.0668659	0.0466259
WHR.UKB	WHR.GIANT	0.1	1e-07	1e-05	324	0.98299	0.036522	1.47e-159	0.911407	1.05457	-0.00637	0.028924	0.825718	-0.063061	0.050321
WHR.UKB	WHR.GIANT	0.1	1e-07	5e-05	363	0.951328	0.03355	7.23e-177	0.88557	1.01709	-0.02266	0.02827	0.422785	-0.0780692	0.0327492
WHR.UKB	WHR.GIANT	0.1	5e-07	5e-06	413	0.976167	0.032589	3.92e-197	0.912293	1.04004	-0.01391	0.025415	0.584181	-0.0637234	0.0359034
WHR.UKB	WHR.GIANT	0.1	5e-07	1e-05	423	0.960743	0.032359	1.03e-193	0.897319	1.02417	-0.01193	0.026264	0.649776	-0.0634074	0.0395474
WHR.UKB	WHR.GIANT	0.1	5e-07	5e-05	459	0.946849	0.030689	1.15e-204	0.886699	1.007	-0.02337	0.025326	0.356138	-0.073009	0.026269
WHR.UKB	WHR.GIANT	0.3	5e-08	5e-06	424	1.00223	0.033426	1.6e-197	0.936715	1.06774	-0.00686	0.02647	0.57464	-0.0587412	0.0450212
WHR.UKB	WHR.GIANT	0.3	5e-08	1e-05	441	0.986524	0.031934	1.52e-209	0.923933	1.04911	-0.01495	0.025725	0.561128	-0.065371	0.035471
WHR.UKB	WHR.GIANT	0.3	5e-08	5e-05	493	0.956304	0.030067	5.42e-222	0.897373	1.01524	-0.02489	0.024989	0.319224	-0.0738684	0.0240884
WHR.UKB	WHR.GIANT	0.3	1e-07	5e-06	468	1.00618	0.02991	4.37e-248	0.947558	1.06481	-0.00602	0.023941	0.737712	-0.0529444	0.0409044
WHR.UKB	WHR.GIANT	0.3	1e-07	1e-05	485	0.991017	0.030113	1.59e-237	0.931996	1.05004	-0.00781	0.025637	0.760736	-0.0580585	0.0424385
WHR.UKB	WHR.GIANT	0.3	1e-07	5e-05	536	0.956493	0.029711	2.19e-227	0.898259	1.01473	-0.01594	0.024235	0.510788	-0.0634406	0.0315606
WHR.UKB	WHR.GIANT	0.3	5e-07	5e-06	625	0.988802	0.027683	1.98e-279	0.934543	1.04306	-0.00548	0.021686	0.800615	-0.0479846	0.0370246
WHR.UKB	WHR.GIANT	0.3	5e-07	1e-05	642	0.978267	0.026916	3.17e-289	0.925512	1.03102	-0.00647	0.021351	0.761781	-0.048318	0.035378
WHR.UKB	WHR.GIANT	0.3	5e-07	5e-05	691	0.953733	0.027064	4.82e-272	0.900688	1.00678	-0.01158	0.022147	0.601085	-0.0549881	0.0318281

## Sheet: Table S5
Supplementary Table 5: Sensitivity analysis of MERLIN in BMI–Testosterone (positive control)
Exposure	Outcome	r2	gwas.p	gwis.p	N.snps	betaA	betaA.se	betaA.pval	betaA.LCL	betaA.UCL	betaI	betaI.se	betaI.pval	betaI.LCL	betaI.UCL
BMI	Testosterone	0.01	5e-08	5e-06	133	-0.01256	0.026675	0.637667	-0.064843	0.039723	-0.13574	0.011337	4.91e-33	-0.157961	-0.113519
BMI	Testosterone	0.01	5e-08	1e-05	133	-0.01347	0.027066	0.618625	-0.0665194	0.0395794	-0.13606	0.011706	3.17e-31	-0.159004	-0.113116
BMI	Testosterone	0.01	5e-08	5e-05	135	-0.00941	0.027373	0.730974	-0.0630611	0.0442411	-0.1348	0.011661	6.56e-31	-0.157656	-0.111944
BMI	Testosterone	0.01	1e-07	5e-06	149	-0.01985	0.024698	0.421534	-0.0682581	0.0285581	-0.14222	0.011163	3.5e-37	-0.164099	-0.120341
BMI	Testosterone	0.01	1e-07	1e-05	149	-0.01892	0.025107	0.451156	-0.0681297	0.0302897	-0.14236	0.010948	1.16e-38	-0.163818	-0.120902
BMI	Testosterone	0.01	1e-07	5e-05	151	-0.01614	0.024235	0.505385	-0.0636406	0.0313606	-0.14073	0.011156	1.77e-36	-0.162596	-0.118864
BMI	Testosterone	0.01	5e-07	5e-06	189	-0.01724	0.021503	0.422578	-0.0593859	0.0249059	-0.1252	0.010247	2.48e-34	-0.145284	-0.105116
BMI	Testosterone	0.01	5e-07	1e-05	189	-0.01603	0.021792	0.4621	-0.0587423	0.0266823	-0.12571	0.010445	2.31e-33	-0.146182	-0.105238
BMI	Testosterone	0.01	5e-07	5e-05	191	-0.01461	0.021486	0.496433	-0.0567226	0.0275026	-0.12496	0.010247	3.34e-34	-0.145044	-0.104876
BMI	Testosterone	0.1	5e-08	5e-06	157	-0.03012	0.02341	0.198255	-0.0760036	0.0157636	-0.13357	0.010067	3.58e-40	-0.153301	-0.113839
BMI	Testosterone	0.1	5e-08	1e-05	157	-0.03101	0.022702	0.171918	-0.0755059	0.0134859	-0.13365	0.010899	1.43e-34	-0.155012	-0.112288
BMI	Testosterone	0.1	5e-08	5e-05	159	-0.02868	0.022445	0.201395	-0.0726722	0.0153122	-0.13209	0.011223	5.65e-32	-0.154087	-0.110093
BMI	Testosterone	0.1	1e-07	5e-06	175	-0.03148	0.021378	0.140924	-0.0733809	0.0104209	-0.13884	0.009882	7.77e-45	-0.158209	-0.119471
BMI	Testosterone	0.1	1e-07	1e-05	175	-0.03079	0.022448	0.170222	-0.0747881	0.0132081	-0.13891	0.01056	1.62e-39	-0.159608	-0.118212
BMI	Testosterone	0.1	1e-07	5e-05	177	-0.02832	0.021221	0.181964	-0.0699132	0.0132732	-0.13784	0.010066	1.11e-42	-0.157569	-0.118111
BMI	Testosterone	0.1	5e-07	5e-06	227	-0.02737	0.018796	0.145321	-0.0642102	0.00947016	-0.12593	0.009676	1.01e-38	-0.144895	-0.106965
BMI	Testosterone	0.1	5e-07	1e-05	227	-0.02788	0.019325	0.149156	-0.065757	0.009997	-0.12596	0.009397	5.75e-41	-0.144378	-0.107542
BMI	Testosterone	0.1	5e-07	5e-05	229	-0.0258	0.020223	0.202007	-0.0654371	0.0138371	-0.12534	0.009187	2.24e-42	-0.143347	-0.107333
BMI	Testosterone	0.3	5e-08	5e-06	205	-0.05124	0.019412	0.008298	-0.0892875	-0.0131925	-0.13794	0.008889	2.62e-54	-0.155362	-0.120518
BMI	Testosterone	0.3	5e-08	1e-05	205	-0.05213	0.019739	0.008269	-0.0908184	-0.0134416	-0.13769	0.009297	1.25e-49	-0.155912	-0.119468
BMI	Testosterone	0.3	5e-08	5e-05	207	-0.05056	0.018981	0.007722	-0.0877628	-0.0133572	-0.13716	0.009237	7.05e-50	-0.155265	-0.119055
BMI	Testosterone	0.3	1e-07	5e-06	232	-0.04877	0.018251	0.00753	-0.084542	-0.012998	-0.1389	0.009176	9.32e-52	-0.156885	-0.120915
BMI	Testosterone	0.3	1e-07	1e-05	232	-0.04811	0.018041	0.007656	-0.0834704	-0.0127496	-0.13883	0.009056	4.74e-53	-0.15658	-0.12108
BMI	Testosterone	0.3	1e-07	5e-05	234	-0.04709	0.017574	0.007371	-0.081535	-0.012645	-0.1382	0.008843	4.72e-55	-0.155532	-0.120868
BMI	Testosterone	0.3	5e-07	5e-06	309	-0.04617	0.01586	0.003605	-0.0772556	-0.0150844	-0.1282	0.007868	1.07e-59	-0.143621	-0.112779
BMI	Testosterone	0.3	5e-07	1e-05	309	-0.04519	0.01609	0.004975	-0.0767264	-0.0136536	-0.12822	0.008285	4.98e-54	-0.144459	-0.111981
BMI	Testosterone	0.3	5e-07	5e-05	311	-0.04486	0.015298	0.003362	-0.0748441	-0.0148759	-0.1282	0.008413	1.97e-52	-0.144689	-0.111711

## Sheet: Table S6
Supplementary Table 6: GWAS Summary-level data of brain IDPs
Reproduced from Supplementary Table 1 of Guo, Nature Neuroscience, 2022; Guo, J., Yu, K., Dong, SS. et al. Mendelian randomization analyses support causal relationships between brain imaging-derived phenotypes and risk of psychiatric disorders. Nat Neurosci 25, 1519–1527 (2022). https://doi.org/10.1038/s41593-022-01174-7
Note: Brain imaging-derived phenotype (IDP); IDP ID and the full description, see Smith, Nature Neuroscience, 2021; Smith, S. M. et al. An expanded set of genome-wide association studies of brain imaging phenotypes in UK Biobank. Nat Neurosci 24, 737-745, doi:10.1038/s41593-021-00826-4 (2021).
IDP Name	IDP ID1	UK Biobank Data-Field ID	IDP SD	IDP Unit	Tissue/Region	Measurement	Classification	Methods	Sample N	IDP full description1
Volume of the left thalamus	IDP.0011	25011	770.247	mm3	Subcortical region	regional and tissue volume	Structural MRI	T1-FIRST	33211	Volume of left thalamus (from T1 brain image)
Volume of the right thalamus	IDP.0012	25012	746.114	mm3	Subcortical region	regional and tissue volume	Structural MRI	T1-FIRST	33211	Volume of right thalamus (from T1 brain image)
Volume of the left caudate	IDP.0013	25013	425.349	mm3	Subcortical region	regional and tissue volume	Structural MRI	T1-FIRST	33211	Volume of left caudate (from T1 brain image)
Volume of the right caudate	IDP.0014	25014	448.619	mm3	Subcortical region	regional and tissue volume	Structural MRI	T1-FIRST	33211	Volume of right caudate (from T1 brain image)
Volume of the left putamen	IDP.0015	25015	609.727	mm3	Subcortical region	regional and tissue volume	Structural MRI	T1-FIRST	33211	Volume of left putamen (from T1 brain image)
Volume of the right putamen	IDP.0016	25016	598.644	mm3	Subcortical region	regional and tissue volume	Structural MRI	T1-FIRST	33211	Volume of right putamen (from T1 brain image)
Volume of the left pallidum	IDP.0017	25017	246.951	mm3	Subcortical region	regional and tissue volume	Structural MRI	T1-FIRST	33211	Volume of left pallidum (from T1 brain image)
Volume of the right pallidum	IDP.0018	25018	247.634	mm3	Subcortical region	regional and tissue volume	Structural MRI	T1-FIRST	33211	Volume of right pallidum (from T1 brain image)
Volume of the left hippocampus	IDP.0019	25019	483.284	mm3	Subcortical region	regional and tissue volume	Structural MRI	T1-FIRST	33211	Volume of left hippocampus (from T1 brain image)
Volume of the right hippocampus	IDP.0020	25020	496.489	mm3	Subcortical region	regional and tissue volume	Structural MRI	T1-FIRST	33211	Volume of right hippocampus (from T1 brain image)
Volume of the left amygdala	IDP.0021	25021	248.206	mm3	Subcortical region	regional and tissue volume	Structural MRI	T1-FIRST	33211	Volume of left amygdala (from T1 brain image)
Volume of the right amygdala	IDP.0022	25022	274.286	mm3	Subcortical region	regional and tissue volume	Structural MRI	T1-FIRST	33211	Volume of right amygdala (from T1 brain image)
Volume of the left accumbens	IDP.0023	25023	121.166	mm3	Subcortical region	regional and tissue volume	Structural MRI	T1-FIRST	33211	Volume of left accumbens (from T1 brain image)
Volume of the right accumbens	IDP.0024	25024	111.575	mm3	Subcortical region	regional and tissue volume	Structural MRI	T1-FIRST	33211	Volume of right accumbens (from T1 brain image)
Volume of the brain stem and 4th ventricle	IDP.0025	25025	2878.45	mm3	Subcortical region	regional and tissue volume	Structural MRI	T1-FIRST	33211	Volume of brain stem + 4th ventricle (from T1 brain image)
Volume of the third ventricle	IDP.0174	26523	569.669	mm3	Subcortical region	regional and tissue volume	Structural MRI	Freesurfer by subcortical volumetric segmentation (aseg)	31968	Volume of 3rd-Ventricle in the whole brain generated by subcortical volumetric segmentation (aseg)
Volume of the 4rd-ventricle	IDP.0175	26524	559.723	mm3	Subcortical region	regional and tissue volume	Structural MRI	Freesurfer by subcortical volumetric segmentation (aseg)	31968	Volume of 4th-Ventricle in the whole brain generated by subcortical volumetric segmentation (aseg)
Volume of the cerebrospinal fluid	IDP.0178	26527	275.104	mm3	Subcortical region	regional and tissue volume	Structural MRI	Freesurfer by subcortical volumetric segmentation (aseg)	31968	Volume of CSF in the whole brain generated by subcortical volumetric segmentation (aseg)
Volume of the white matter hyperintensities	IDP.0179	26528	2966.87	mm3	Total brain	regional and tissue volume	Structural MRI	Freesurfer by subcortical volumetric segmentation (aseg)	31968	Volume of WM-hypointensities in the whole brain generated by subcortical volumetric segmentation (aseg)
Volume of the left lateral ventricle	IDP.0191	26554	7976.06	mm3	Subcortical region	regional and tissue volume	Structural MRI	Freesurfer by subcortical volumetric segmentation (aseg)	31968	Volume of Lateral-Ventricle in the left hemisphere generated by subcortical volumetric segmentation (aseg)
Volume of the left cerebellum white matter	IDP.0193	26556	2145.39	mm3	Subcortical region	regional and tissue volume	Structural MRI	Freesurfer by subcortical volumetric segmentation (aseg)	31968	Volume of Cerebellum-White-Matter in the left hemisphere generated by subcortical volumetric segmentation (aseg)
Volume of the left cerebellum cortex	IDP.0194	26557	5810.67	mm3	Subcortical region	regional and tissue volume	Structural MRI	Freesurfer by subcortical volumetric segmentation (aseg)	31968	Volume of Cerebellum-Cortex in the left hemisphere generated by subcortical volumetric segmentation (aseg)
Volume of the right lateral ventricle	IDP.0208	26585	7000.3	mm3	Subcortical region	regional and tissue volume	Structural MRI	Freesurfer by subcortical volumetric segmentation (aseg)	31968	Volume of Lateral-Ventricle in the right hemisphere generated by subcortical volumetric segmentation (aseg)
Volume of the right cerebellum white matter	IDP.0210	26587	2230.23	mm3	Subcortical region	regional and tissue volume	Structural MRI	Freesurfer by subcortical volumetric segmentation (aseg)	31968	Volume of Cerebellum-White-Matter in the right hemisphere generated by subcortical volumetric segmentation (aseg)
Volume of the right cerebellum cortex	IDP.0211	26588	6220.85	mm3	Subcortical region	regional and tissue volume	Structural MRI	Freesurfer by subcortical volumetric segmentation (aseg)	31968	Volume of Cerebellum-Cortex in the right hemisphere generated by subcortical volumetric segmentation (aseg)
Volume of the left banks superior temporal sulcus	IDP.0344	26789	456.999	mm3	Temporal lobe	regional and tissue volume	Structural MRI	Freesurfer by parcellation of the white surface using Desikan-Killiany parcellation	31968	Volume of bankssts in the left hemisphere generated by parcellation of the white surface using Desikan-Killiany parcellation
Volume of the left caudal anterior-cingulate cortex	IDP.0345	26790	535.398	mm3	Limbic system	regional and tissue volume	Structural MRI	Freesurfer by parcellation of the white surface using Desikan-Killiany parcellation	31967	Volume of caudalanteriorcingulate in the left hemisphere generated by parcellation of the white surface using Desikan-Killiany parcellation
Volume of the left caudal middle frontal gyrus	IDP.0346	26791	1087.75	mm3	Frontal lobe	regional and tissue volume	Structural MRI	Freesurfer by parcellation of the white surface using Desikan-Killiany parcellation	31968	Volume of caudalmiddlefrontal in the left hemisphere generated by parcellation of the white surface using Desikan-Killiany parcellation
Volume of the left cuneus cortex	IDP.0347	26792	568.633	mm3	Occipital lobe	regional and tissue volume	Structural MRI	Freesurfer by parcellation of the white surface using Desikan-Killiany parcellation	31968	Volume of cuneus in the left hemisphere generated by parcellation of the white surface using Desikan-Killiany parcellation
Volume of the left entorhinal cortex	IDP.0348	26793	399.514	mm3	Temporal lobe	regional and tissue volume	Structural MRI	Freesurfer by parcellation of the white surface using Desikan-Killiany parcellation	31967	Volume of entorhinal in the left hemisphere generated by parcellation of the white surface using Desikan-Killiany parcellation
Volume of the left fusiform gyrus	IDP.0349	26794	1336.46	mm3	Temporal lobe	regional and tissue volume	Structural MRI	Freesurfer by parcellation of the white surface using Desikan-Killiany parcellation	31968	Volume of fusiform in the left hemisphere generated by parcellation of the white surface using Desikan-Killiany parcellation
Volume of the left inferior parietal cortex	IDP.0350	26795	1832.08	mm3	Parietal lobe	regional and tissue volume	Structural MRI	Freesurfer by parcellation of the white surface using Desikan-Killiany parcellation	31968	Volume of inferiorparietal in the left hemisphere generated by parcellation of the white surface using Desikan-Killiany parcellation
Volume of the left inferior temporal gyrus	IDP.0351	26796	1696.87	mm3	Temporal lobe	regional and tissue volume	Structural MRI	Freesurfer by parcellation of the white surface using Desikan-Killiany parcellation	31968	Volume of inferiortemporal in the left hemisphere generated by parcellation of the white surface using Desikan-Killiany parcellation
Volume of the left isthmus-cingulate cortex	IDP.0352	26797	448.747	mm3	Limbic system	regional and tissue volume	Structural MRI	Freesurfer by parcellation of the white surface using Desikan-Killiany parcellation	31967	Volume of isthmuscingulate in the left hemisphere generated by parcellation of the white surface using Desikan-Killiany parcellation
Volume of the left lateral occipital cortex	IDP.0353	26798	1751.21	mm3	Occipital lobe	regional and tissue volume	Structural MRI	Freesurfer by parcellation of the white surface using Desikan-Killiany parcellation	31968	Volume of lateraloccipital in the left hemisphere generated by parcellation of the white surface using Desikan-Killiany parcellation
Volume of the left lateral orbital frontal cortex	IDP.0354	26799	905.076	mm3	Frontal lobe	regional and tissue volume	Structural MRI	Freesurfer by parcellation of the white surface using Desikan-Killiany parcellation	31967	Volume of lateralorbitofrontal in the left hemisphere generated by parcellation of the white surface using Desikan-Killiany parcellation
Volume of the left lingual gyrus	IDP.0355	26800	1125.33	mm3	Temporal lobe	regional and tissue volume	Structural MRI	Freesurfer by parcellation of the white surface using Desikan-Killiany parcellation	31968	Volume of lingual in the left hemisphere generated by parcellation of the white surface using Desikan-Killiany parcellation
Volume of the left medial orbital frontal cortex	IDP.0356	26801	730.681	mm3	Frontal lobe	regional and tissue volume	Structural MRI	Freesurfer by parcellation of the white surface using Desikan-Killiany parcellation	31968	Volume of medialorbitofrontal in the left hemisphere generated by parcellation of the white surface using Desikan-Killiany parcellation
Volume of the left middle temporal gyrus	IDP.0357	26802	1607.85	mm3	Temporal lobe	regional and tissue volume	Structural MRI	Freesurfer by parcellation of the white surface using Desikan-Killiany parcellation	31968	Volume of middletemporal in the left hemisphere generated by parcellation of the white surface using Desikan-Killiany parcellation
Volume of the left parahippocampal gyrus	IDP.0358	26803	312.996	mm3	Limbic system	regional and tissue volume	Structural MRI	Freesurfer by parcellation of the white surface using Desikan-Killiany parcellation	31968	Volume of parahippocampal in the left hemisphere generated by parcellation of the white surface using Desikan-Killiany parcellation
Volume of the left paracentral lobule	IDP.0359	26804	514.409	mm3	Parietal lobe	regional and tissue volume	Structural MRI	Freesurfer by parcellation of the white surface using Desikan-Killiany parcellation	31968	Volume of paracentral in the left hemisphere generated by parcellation of the white surface using Desikan-Killiany parcellation
Volume of the left pars opercularis	IDP.0360	26805	776.853	mm3	Frontal lobe	regional and tissue volume	Structural MRI	Freesurfer by parcellation of the white surface using Desikan-Killiany parcellation	31968	Volume of parsopercularis in the left hemisphere generated by parcellation of the white surface using Desikan-Killiany parcellation
Volume of the left pars orbitalis	IDP.0361	26806	343.193	mm3	Frontal lobe	regional and tissue volume	Structural MRI	Freesurfer by parcellation of the white surface using Desikan-Killiany parcellation	31967	Volume of parsorbitalis in the left hemisphere generated by parcellation of the white surface using Desikan-Killiany parcellation
Volume of the left pars trangularis	IDP.0362	26807	596.993	mm3	Frontal lobe	regional and tissue volume	Structural MRI	Freesurfer by parcellation of the white surface using Desikan-Killiany parcellation	31968	Volume of parstriangularis in the left hemisphere generated by parcellation of the white surface using Desikan-Killiany parcellation
Volume of the left pericalcarine cortex	IDP.0363	26808	444.339	mm3	Parietal lobe	regional and tissue volume	Structural MRI	Freesurfer by parcellation of the white surface using Desikan-Killiany parcellation	31968	Volume of pericalcarine in the left hemisphere generated by parcellation of the white surface using Desikan-Killiany parcellation
Volume of the left postcentral gyrus	IDP.0364	26809	1380.91	mm3	Parietal lobe	regional and tissue volume	Structural MRI	Freesurfer by parcellation of the white surface using Desikan-Killiany parcellation	31968	Volume of postcentral in the left hemisphere generated by parcellation of the white surface using Desikan-Killiany parcellation
Volume of the left posterior-cingulate cortex	IDP.0365	26810	529.167	mm3	Limbic system	regional and tissue volume	Structural MRI	Freesurfer by parcellation of the white surface using Desikan-Killiany parcellation	31967	Volume of posteriorcingulate in the left hemisphere generated by parcellation of the white surface using Desikan-Killiany parcellation
Volume of the left precentral gyrus	IDP.0366	26811	1702.91	mm3	Parietal lobe	regional and tissue volume	Structural MRI	Freesurfer by parcellation of the white surface using Desikan-Killiany parcellation	31968	Volume of precentral in the left hemisphere generated by parcellation of the white surface using Desikan-Killiany parcellation
Volume of the left precuneus cortex	IDP.0367	26812	1338.31	mm3	Parietal lobe	regional and tissue volume	Structural MRI	Freesurfer by parcellation of the white surface using Desikan-Killiany parcellation	31968	Volume of precuneus in the left hemisphere generated by parcellation of the white surface using Desikan-Killiany parcellation
Volume of the left rostral anterior cingulate cortex	IDP.0368	26813	569.227	mm3	Limbic system	regional and tissue volume	Structural MRI	Freesurfer by parcellation of the white surface using Desikan-Killiany parcellation	31967	Volume of rostralanteriorcingulate in the left hemisphere generated by parcellation of the white surface using Desikan-Killiany parcellation
Volume of the left rostral middle cingulate cortex	IDP.0369	26814	2235.7	mm3	Limbic system	regional and tissue volume	Structural MRI	Freesurfer by parcellation of the white surface using Desikan-Killiany parcellation	31968	Volume of rostralmiddlefrontal in the left hemisphere generated by parcellation of the white surface using Desikan-Killiany parcellation
Volume of the left superior frontal gyrus	IDP.0370	26815	2926.1	mm3	Frontal lobe	regional and tissue volume	Structural MRI	Freesurfer by parcellation of the white surface using Desikan-Killiany parcellation	31968	Volume of superiorfrontal in the left hemisphere generated by parcellation of the white surface using Desikan-Killiany parcellation
Volume of the left superior parietal gyrus	IDP.0371	26816	1852.86	mm3	Parietal lobe	regional and tissue volume	Structural MRI	Freesurfer by parcellation of the white surface using Desikan-Killiany parcellation	31968	Volume of superiorparietal in the left hemisphere generated by parcellation of the white surface using Desikan-Killiany parcellation
Volume of the left superior temporal gyrus	IDP.0372	26817	1670.27	mm3	Temporal lobe	regional and tissue volume	Structural MRI	Freesurfer by parcellation of the white surface using Desikan-Killiany parcellation	31968	Volume of superiortemporal in the left hemisphere generated by parcellation of the white surface using Desikan-Killiany parcellation
Volume of the left supramarginal gyrus	IDP.0373	26818	1886.17	mm3	Parietal lobe	regional and tissue volume	Structural MRI	Freesurfer by parcellation of the white surface using Desikan-Killiany parcellation	31968	Volume of supramarginal in the left hemisphere generated by parcellation of the white surface using Desikan-Killiany parcellation
Volume of the left frontal pole	IDP.0374	26819	145.05	mm3	Frontal lobe	regional and tissue volume	Structural MRI	Freesurfer by parcellation of the white surface using Desikan-Killiany parcellation	31967	Volume of frontalpole in the left hemisphere generated by parcellation of the white surface using Desikan-Killiany parcellation
Volume of the left transverse temporal cortex	IDP.0375	26820	233.542	mm3	Temporal lobe	regional and tissue volume	Structural MRI	Freesurfer by parcellation of the white surface using Desikan-Killiany parcellation	31968	Volume of transversetemporal in the left hemisphere generated by parcellation of the white surface using Desikan-Killiany parcellation
Volume of the left insula	IDP.0376	26821	802.408	mm3	Insula	regional and tissue volume	Structural MRI	Freesurfer by parcellation of the white surface using Desikan-Killiany parcellation	31968	Volume of insula in the left hemisphere generated by parcellation of the white surface using Desikan-Killiany parcellation
Volume of the right banks superior temporal sulcus	IDP.0377	26890	362.793	mm3	Temporal lobe	regional and tissue volume	Structural MRI	Freesurfer by parcellation of the white surface using Desikan-Killiany parcellation	31968	Volume of bankssts in the right hemisphere generated by parcellation of the white surface using Desikan-Killiany parcellation
Volume of the right caudal anterior-cingulate cortex	IDP.0378	26891	544.007	mm3	Limbic system	regional and tissue volume	Structural MRI	Freesurfer by parcellation of the white surface using Desikan-Killiany parcellation	31966	Volume of caudalanteriorcingulate in the right hemisphere generated by parcellation of the white surface using Desikan-Killiany parcellation
Volume of the right caudal middle frontal gyrus	IDP.0379	26892	1091.08	mm3	Frontal lobe	regional and tissue volume	Structural MRI	Freesurfer by parcellation of the white surface using Desikan-Killiany parcellation	31968	Volume of caudalmiddlefrontal in the right hemisphere generated by parcellation of the white surface using Desikan-Killiany parcellation
Volume of the right cuneus cortex	IDP.0380	26893	566.767	mm3	Occipital lobe	regional and tissue volume	Structural MRI	Freesurfer by parcellation of the white surface using Desikan-Killiany parcellation	31968	Volume of cuneus in the right hemisphere generated by parcellation of the white surface using Desikan-Killiany parcellation
Volume of the right entorhinal cortex	IDP.0381	26894	370.683	mm3	Temporal lobe	regional and tissue volume	Structural MRI	Freesurfer by parcellation of the white surface using Desikan-Killiany parcellation	31968	Volume of entorhinal in the right hemisphere generated by parcellation of the white surface using Desikan-Killiany parcellation
Volume of the right fusiform gyrus	IDP.0382	26895	1360.87	mm3	Temporal lobe	regional and tissue volume	Structural MRI	Freesurfer by parcellation of the white surface using Desikan-Killiany parcellation	31968	Volume of fusiform in the right hemisphere generated by parcellation of the white surface using Desikan-Killiany parcellation
Volume of the right inferior parietal cortex	IDP.0383	26896	2210.86	mm3	Parietal lobe	regional and tissue volume	Structural MRI	Freesurfer by parcellation of the white surface using Desikan-Killiany parcellation	31968	Volume of inferiorparietal in the right hemisphere generated by parcellation of the white surface using Desikan-Killiany parcellation
Volume of the right inferior temporal gyrus	IDP.0384	26897	1624.63	mm3	Temporal lobe	regional and tissue volume	Structural MRI	Freesurfer by parcellation of the white surface using Desikan-Killiany parcellation	31968	Volume of inferiortemporal in the right hemisphere generated by parcellation of the white surface using Desikan-Killiany parcellation
Volume of the right isthmus-cingulate cortex	IDP.0385	26898	418.604	mm3	Limbic system	regional and tissue volume	Structural MRI	Freesurfer by parcellation of the white surface using Desikan-Killiany parcellation	31968	Volume of isthmuscingulate in the right hemisphere generated by parcellation of the white surface using Desikan-Killiany parcellation
Volume of the right lateral occipital cortex	IDP.0386	26899	1865.22	mm3	Occipital lobe	regional and tissue volume	Structural MRI	Freesurfer by parcellation of the white surface using Desikan-Killiany parcellation	31968	Volume of lateraloccipital in the right hemisphere generated by parcellation of the white surface using Desikan-Killiany parcellation
Volume of the right lateral orbital frontal cortex	IDP.0387	26900	887.25	mm3	Frontal lobe	regional and tissue volume	Structural MRI	Freesurfer by parcellation of the white surface using Desikan-Killiany parcellation	31968	Volume of lateralorbitofrontal in the right hemisphere generated by parcellation of the white surface using Desikan-Killiany parcellation
Volume of the right lingual gyrus	IDP.0388	26901	1165.34	mm3	Temporal lobe	regional and tissue volume	Structural MRI	Freesurfer by parcellation of the white surface using Desikan-Killiany parcellation	31968	Volume of lingual in the right hemisphere generated by parcellation of the white surface using Desikan-Killiany parcellation
Volume of the right medial orbital frontal cortex	IDP.0389	26902	711.257	mm3	Frontal lobe	regional and tissue volume	Structural MRI	Freesurfer by parcellation of the white surface using Desikan-Killiany parcellation	31968	Volume of medialorbitofrontal in the right hemisphere generated by parcellation of the white surface using Desikan-Killiany parcellation
Volume of the right middle temporal gyrus	IDP.0390	26903	1625.27	mm3	Temporal lobe	regional and tissue volume	Structural MRI	Freesurfer by parcellation of the white surface using Desikan-Killiany parcellation	31968	Volume of middletemporal in the right hemisphere generated by parcellation of the white surface using Desikan-Killiany parcellation
Volume of the right parahippocampal gyrus	IDP.0391	26904	272.007	mm3	Limbic system	regional and tissue volume	Structural MRI	Freesurfer by parcellation of the white surface using Desikan-Killiany parcellation	31968	Volume of parahippocampal in the right hemisphere generated by parcellation of the white surface using Desikan-Killiany parcellation
Volume of the right paracentral lobule	IDP.0392	26905	599.099	mm3	Parietal lobe	regional and tissue volume	Structural MRI	Freesurfer by parcellation of the white surface using Desikan-Killiany parcellation	31968	Volume of paracentral in the right hemisphere generated by parcellation of the white surface using Desikan-Killiany parcellation
Volume of the right pars opercularis	IDP.0393	26906	631.922	mm3	Frontal lobe	regional and tissue volume	Structural MRI	Freesurfer by parcellation of the white surface using Desikan-Killiany parcellation	31968	Volume of parsopercularis in the right hemisphere generated by parcellation of the white surface using Desikan-Killiany parcellation
Volume of the right pars orbitalis	IDP.0394	26907	396.105	mm3	Frontal lobe	regional and tissue volume	Structural MRI	Freesurfer by parcellation of the white surface using Desikan-Killiany parcellation	31966	Volume of parsorbitalis in the right hemisphere generated by parcellation of the white surface using Desikan-Killiany parcellation
Volume of the right pars triangularis	IDP.0395	26908	705.787	mm3	Frontal lobe	regional and tissue volume	Structural MRI	Freesurfer by parcellation of the white surface using Desikan-Killiany parcellation	31968	Volume of parstriangularis in the right hemisphere generated by parcellation of the white surface using Desikan-Killiany parcellation
Volume of the right pericalcarine cortex	IDP.0396	26909	476.006	mm3	Parietal lobe	regional and tissue volume	Structural MRI	Freesurfer by parcellation of the white surface using Desikan-Killiany parcellation	31968	Volume of pericalcarine in the right hemisphere generated by parcellation of the white surface using Desikan-Killiany parcellation
Volume of the right postcentral gyrus	IDP.0397	26910	1360.79	mm3	Parietal lobe	regional and tissue volume	Structural MRI	Freesurfer by parcellation of the white surface using Desikan-Killiany parcellation	31968	Volume of postcentral in the right hemisphere generated by parcellation of the white surface using Desikan-Killiany parcellation
Volume of the right posterior-cingulate cortex	IDP.0398	26911	549.028	mm3	Limbic system	regional and tissue volume	Structural MRI	Freesurfer by parcellation of the white surface using Desikan-Killiany parcellation	31968	Volume of posteriorcingulate in the right hemisphere generated by parcellation of the white surface using Desikan-Killiany parcellation
Volume of the right precentral gyrus	IDP.0399	26912	1711.83	mm3	Parietal lobe	regional and tissue volume	Structural MRI	Freesurfer by parcellation of the white surface using Desikan-Killiany parcellation	31968	Volume of precentral in the right hemisphere generated by parcellation of the white surface using Desikan-Killiany parcellation
Volume of the right precuneus cortex	IDP.0400	26913	1364.18	mm3	Parietal lobe	regional and tissue volume	Structural MRI	Freesurfer by parcellation of the white surface using Desikan-Killiany parcellation	31968	Volume of precuneus in the right hemisphere generated by parcellation of the white surface using Desikan-Killiany parcellation
Volume of the right rostral anterior cingulate cortex	IDP.0401	26914	463.342	mm3	Limbic system	regional and tissue volume	Structural MRI	Freesurfer by parcellation of the white surface using Desikan-Killiany parcellation	31967	Volume of rostralanteriorcingulate in the right hemisphere generated by parcellation of the white surface using Desikan-Killiany parcellation
Volume of the right rostral middle cingulate cortex	IDP.0402	26915	2359.7	mm3	Limbic system	regional and tissue volume	Structural MRI	Freesurfer by parcellation of the white surface using Desikan-Killiany parcellation	31968	Volume of rostralmiddlefrontal in the right hemisphere generated by parcellation of the white surface using Desikan-Killiany parcellation
Volume of the right superior frontal gyrus	IDP.0403	26916	2871.4	mm3	Frontal lobe	regional and tissue volume	Structural MRI	Freesurfer by parcellation of the white surface using Desikan-Killiany parcellation	31968	Volume of superiorfrontal in the right hemisphere generated by parcellation of the white surface using Desikan-Killiany parcellation
Volume of the right superior parietal gyrus	IDP.0404	26917	1793.37	mm3	Parietal lobe	regional and tissue volume	Structural MRI	Freesurfer by parcellation of the white surface using Desikan-Killiany parcellation	31968	Volume of superiorparietal in the right hemisphere generated by parcellation of the white surface using Desikan-Killiany parcellation
Volume of the right superior temporal gyrus	IDP.0405	26918	1468.32	mm3	Temporal lobe	regional and tissue volume	Structural MRI	Freesurfer by parcellation of the white surface using Desikan-Killiany parcellation	31968	Volume of superiortemporal in the right hemisphere generated by parcellation of the white surface using Desikan-Killiany parcellation
Volume of the right supramarginal gyrus	IDP.0406	26919	1588.28	mm3	Parietal lobe	regional and tissue volume	Structural MRI	Freesurfer by parcellation of the white surface using Desikan-Killiany parcellation	31968	Volume of supramarginal in the right hemisphere generated by parcellation of the white surface using Desikan-Killiany parcellation
Volume of the right frontal pole	IDP.0407	26920	170.335	mm3	Frontal lobe	regional and tissue volume	Structural MRI	Freesurfer by parcellation of the white surface using Desikan-Killiany parcellation	31967	Volume of frontalpole in the right hemisphere generated by parcellation of the white surface using Desikan-Killiany parcellation
Volume of the right transverse temporal cortex	IDP.0408	26921	176.032	mm3	Temporal lobe	regional and tissue volume	Structural MRI	Freesurfer by parcellation of the white surface using Desikan-Killiany parcellation	31967	Volume of transversetemporal in the right hemisphere generated by parcellation of the white surface using Desikan-Killiany parcellation
Volume of the right insula	IDP.0409	26922	880.348	mm3	Insula	regional and tissue volume	Structural MRI	Freesurfer by parcellation of the white surface using Desikan-Killiany parcellation	31968	Volume of insula in the right hemisphere generated by parcellation of the white surface using Desikan-Killiany parcellation
Cortical surface area of the total left hemisphere	IDP.0648	26721	7744.92	mm2	Total brain	cortical area	Structural MRI	Freesurfer by parcellation of the white surface using Desikan-Killiany parcellation	31968	Area of TotalSurface in the left hemisphere generated by parcellation of the white surface using Desikan-Killiany parcellation
Cortical surface area of the left banks superior temporal sulcus	IDP.0649	26722	155.649	mm2	Temporal lobe	cortical area	Structural MRI	Freesurfer by parcellation of the white surface using Desikan-Killiany parcellation	31968	Area of bankssts in the left hemisphere generated by parcellation of the white surface using Desikan-Killiany parcellation
Cortical surface area of the left caudal anterior-cingulate cortex	IDP.0650	26723	134.862	mm2	Limbic system	cortical area	Structural MRI	Freesurfer by parcellation of the white surface using Desikan-Killiany parcellation	31967	Area of caudalanteriorcingulate in the left hemisphere generated by parcellation of the white surface using Desikan-Killiany parcellation
Cortical surface area of the left caudal middle frontal gyrus	IDP.0651	26724	333.12	mm2	Frontal lobe	cortical area	Structural MRI	Freesurfer by parcellation of the white surface using Desikan-Killiany parcellation	31968	Area of caudalmiddlefrontal in the left hemisphere generated by parcellation of the white surface using Desikan-Killiany parcellation
Cortical surface area of the left cuneus cortex	IDP.0652	26725	222.828	mm2	Occipital lobe	cortical area	Structural MRI	Freesurfer by parcellation of the white surface using Desikan-Killiany parcellation	31968	Area of cuneus in the left hemisphere generated by parcellation of the white surface using Desikan-Killiany parcellation
Cortical surface area of the left entorhinal cortex	IDP.0653	26726	91.7048	mm2	Temporal lobe	cortical area	Structural MRI	Freesurfer by parcellation of the white surface using Desikan-Killiany parcellation	31967	Area of entorhinal in the left hemisphere generated by parcellation of the white surface using Desikan-Killiany parcellation
Cortical surface area of the left fusiform gyrus	IDP.0654	26727	361.175	mm2	Temporal lobe	cortical area	Structural MRI	Freesurfer by parcellation of the white surface using Desikan-Killiany parcellation	31968	Area of fusiform in the left hemisphere generated by parcellation of the white surface using Desikan-Killiany parcellation
Cortical surface area of the left inferior parietal cortex	IDP.0655	26728	608.169	mm2	Parietal lobe	cortical area	Structural MRI	Freesurfer by parcellation of the white surface using Desikan-Killiany parcellation	31968	Area of inferiorparietal in the left hemisphere generated by parcellation of the white surface using Desikan-Killiany parcellation
Cortical surface area of the left inferior temporal gyrus	IDP.0656	26729	453.013	mm2	Temporal lobe	cortical area	Structural MRI	Freesurfer by parcellation of the white surface using Desikan-Killiany parcellation	31968	Area of inferiortemporal in the left hemisphere generated by parcellation of the white surface using Desikan-Killiany parcellation
Cortical surface area of the left isthmus-cingulate cortex	IDP.0657	26730	164.482	mm2	Limbic system	cortical area	Structural MRI	Freesurfer by parcellation of the white surface using Desikan-Killiany parcellation	31967	Area of isthmuscingulate in the left hemisphere generated by parcellation of the white surface using Desikan-Killiany parcellation
Cortical surface area of the left lateral occipital cortex	IDP.0658	26731	618.07	mm2	Occipital lobe	cortical area	Structural MRI	Freesurfer by parcellation of the white surface using Desikan-Killiany parcellation	31968	Area of lateraloccipital in the left hemisphere generated by parcellation of the white surface using Desikan-Killiany parcellation
Cortical surface area of the left lateral orbital frontal cortex	IDP.0659	26732	273.603	mm2	Frontal lobe	cortical area	Structural MRI	Freesurfer by parcellation of the white surface using Desikan-Killiany parcellation	31967	Area of lateralorbitofrontal in the left hemisphere generated by parcellation of the white surface using Desikan-Killiany parcellation
Cortical surface area of the left lingual gyrus	IDP.0660	26733	398.839	mm2	Temporal lobe	cortical area	Structural MRI	Freesurfer by parcellation of the white surface using Desikan-Killiany parcellation	31968	Area of lingual in the left hemisphere generated by parcellation of the white surface using Desikan-Killiany parcellation
Cortical surface area of the left medial orbital frontal cortex	IDP.0661	26734	234.412	mm2	Frontal lobe	cortical area	Structural MRI	Freesurfer by parcellation of the white surface using Desikan-Killiany parcellation	31968	Area of medialorbitofrontal in the left hemisphere generated by parcellation of the white surface using Desikan-Killiany parcellation
Cortical surface area of the left middle temporal gyrus	IDP.0662	26735	403.704	mm2	Temporal lobe	cortical area	Structural MRI	Freesurfer by parcellation of the white surface using Desikan-Killiany parcellation	31968	Area of middletemporal in the left hemisphere generated by parcellation of the white surface using Desikan-Killiany parcellation
Cortical surface area of the left parahippocampal gyrus	IDP.0663	26736	77.7344	mm2	Limbic system	cortical area	Structural MRI	Freesurfer by parcellation of the white surface using Desikan-Killiany parcellation	31968	Area of parahippocampal in the left hemisphere generated by parcellation of the white surface using Desikan-Killiany parcellation
Cortical surface area of the left paracentral lobule	IDP.0664	26737	167.071	mm2	Parietal lobe	cortical area	Structural MRI	Freesurfer by parcellation of the white surface using Desikan-Killiany parcellation	31968	Area of paracentral in the left hemisphere generated by parcellation of the white surface using Desikan-Killiany parcellation
Cortical surface area of the left pars opercularis	IDP.0665	26738	229.473	mm2	Frontal lobe	cortical area	Structural MRI	Freesurfer by parcellation of the white surface using Desikan-Killiany parcellation	31968	Area of parsopercularis in the left hemisphere generated by parcellation of the white surface using Desikan-Killiany parcellation
Cortical surface area of the left pars orbitalis	IDP.0666	26739	87.8647	mm2	Frontal lobe	cortical area	Structural MRI	Freesurfer by parcellation of the white surface using Desikan-Killiany parcellation	31967	Area of parsorbitalis in the left hemisphere generated by parcellation of the white surface using Desikan-Killiany parcellation
Cortical surface area of the left pars triangularis cortex	IDP.0667	26740	186.782	mm2	Frontal lobe	cortical area	Structural MRI	Freesurfer by parcellation of the white surface using Desikan-Killiany parcellation	31968	Area of parstriangularis in the left hemisphere generated by parcellation of the white surface using Desikan-Killiany parcellation
Cortical surface area of the left pericalcarine cortex	IDP.0668	26741	248.054	mm2	Parietal lobe	cortical area	Structural MRI	Freesurfer by parcellation of the white surface using Desikan-Killiany parcellation	31968	Area of pericalcarine in the left hemisphere generated by parcellation of the white surface using Desikan-Killiany parcellation
Cortical surface area of the left postcentral gyrus	IDP.0669	26742	455.157	mm2	Parietal lobe	cortical area	Structural MRI	Freesurfer by parcellation of the white surface using Desikan-Killiany parcellation	31968	Area of postcentral in the left hemisphere generated by parcellation of the white surface using Desikan-Killiany parcellation
Cortical surface area of the left posterior-cingulate cortex	IDP.0670	26743	173.075	mm2	Limbic system	cortical area	Structural MRI	Freesurfer by parcellation of the white surface using Desikan-Killiany parcellation	31967	Area of posteriorcingulate in the left hemisphere generated by parcellation of the white surface using Desikan-Killiany parcellation
Cortical surface area of the left precentral gyrus	IDP.0671	26744	498.832	mm2	Parietal lobe	cortical area	Structural MRI	Freesurfer by parcellation of the white surface using Desikan-Killiany parcellation	31968	Area of precentral in the left hemisphere generated by parcellation of the white surface using Desikan-Killiany parcellation
Cortical surface area of the left precuneus cortex	IDP.0672	26745	475.223	mm2	Parietal lobe	cortical area	Structural MRI	Freesurfer by parcellation of the white surface using Desikan-Killiany parcellation	31968	Area of precuneus in the left hemisphere generated by parcellation of the white surface using Desikan-Killiany parcellation
Cortical surface area of the left rostral anterior cingulate cortex	IDP.0673	26746	171.762	mm2	Limbic system	cortical area	Structural MRI	Freesurfer by parcellation of the white surface using Desikan-Killiany parcellation	31967	Area of rostralanteriorcingulate in the left hemisphere generated by parcellation of the white surface using Desikan-Killiany parcellation
Cortical surface area of the left rostral middle cingulate cortex	IDP.0674	26747	740.261	mm2	Limbic system	cortical area	Structural MRI	Freesurfer by parcellation of the white surface using Desikan-Killiany parcellation	31968	Area of rostralmiddlefrontal in the left hemisphere generated by parcellation of the white surface using Desikan-Killiany parcellation
Cortical surface area of the left superior frontal gyrus	IDP.0675	26748	863.092	mm2	Frontal lobe	cortical area	Structural MRI	Freesurfer by parcellation of the white surface using Desikan-Killiany parcellation	31968	Area of superiorfrontal in the left hemisphere generated by parcellation of the white surface using Desikan-Killiany parcellation
Cortical surface area of the left superior parietal gyrus	IDP.0676	26749	647.157	mm2	Parietal lobe	cortical area	Structural MRI	Freesurfer by parcellation of the white surface using Desikan-Killiany parcellation	31968	Area of superiorparietal in the left hemisphere generated by parcellation of the white surface using Desikan-Killiany parcellation
Cortical surface area of the left superior temporal gyrus	IDP.0677	26750	447.672	mm2	Temporal lobe	cortical area	Structural MRI	Freesurfer by parcellation of the white surface using Desikan-Killiany parcellation	31968	Area of superiortemporal in the left hemisphere generated by parcellation of the white surface using Desikan-Killiany parcellation
Cortical surface area of the left supramarginal gyrus	IDP.0678	26751	624.364	mm2	Parietal lobe	cortical area	Structural MRI	Freesurfer by parcellation of the white surface using Desikan-Killiany parcellation	31968	Area of supramarginal in the left hemisphere generated by parcellation of the white surface using Desikan-Killiany parcellation
Cortical surface area of the left frontal pole	IDP.0679	26752	29.7358	mm2	Frontal lobe	cortical area	Structural MRI	Freesurfer by parcellation of the white surface using Desikan-Killiany parcellation	31967	Area of frontalpole in the left hemisphere generated by parcellation of the white surface using Desikan-Killiany parcellation
Cortical surface area of the left transverse temporal cortex	IDP.0680	26753	71.4229	mm2	Temporal lobe	cortical area	Structural MRI	Freesurfer by parcellation of the white surface using Desikan-Killiany parcellation	31968	Area of transversetemporal in the left hemisphere generated by parcellation of the white surface using Desikan-Killiany parcellation
Cortical surface area of the left insula	IDP.0681	26754	261.145	mm2	Insula	cortical area	Structural MRI	Freesurfer by parcellation of the white surface using Desikan-Killiany parcellation	31968	Area of insula in the left hemisphere generated by parcellation of the white surface using Desikan-Killiany parcellation
Cortical surface area of the total right hemisphere	IDP.0682	26822	7881.75	mm2	Total brain	cortical area	Structural MRI	Freesurfer by parcellation of the white surface using Desikan-Killiany parcellation	31968	Area of TotalSurface in the right hemisphere generated by parcellation of the white surface using Desikan-Killiany parcellation
Cortical surface area of the right banks superior temporal sulcus	IDP.0683	26823	120.299	mm2	Temporal lobe	cortical area	Structural MRI	Freesurfer by parcellation of the white surface using Desikan-Killiany parcellation	31968	Area of bankssts in the right hemisphere generated by parcellation of the white surface using Desikan-Killiany parcellation
Cortical surface area of the right caudal anterior-cingulate cortex	IDP.0684	26824	150.171	mm2	Limbic system	cortical area	Structural MRI	Freesurfer by parcellation of the white surface using Desikan-Killiany parcellation	31966	Area of caudalanteriorcingulate in the right hemisphere generated by parcellation of the white surface using Desikan-Killiany parcellation
Cortical surface area of the right caudal middle frontal gyrus	IDP.0685	26825	332.892	mm2	Frontal lobe	cortical area	Structural MRI	Freesurfer by parcellation of the white surface using Desikan-Killiany parcellation	31968	Area of caudalmiddlefrontal in the right hemisphere generated by parcellation of the white surface using Desikan-Killiany parcellation
Cortical surface area of the right cuneus cortex	IDP.0686	26826	228.427	mm2	Occipital lobe	cortical area	Structural MRI	Freesurfer by parcellation of the white surface using Desikan-Killiany parcellation	31968	Area of cuneus in the right hemisphere generated by parcellation of the white surface using Desikan-Killiany parcellation
Cortical surface area of the right entorhinal cortex	IDP.0687	26827	77.5032	mm2	Temporal lobe	cortical area	Structural MRI	Freesurfer by parcellation of the white surface using Desikan-Killiany parcellation	31968	Area of entorhinal in the right hemisphere generated by parcellation of the white surface using Desikan-Killiany parcellation
Cortical surface area of the right fusiform gyrus	IDP.0688	26828	372.771	mm2	Temporal lobe	cortical area	Structural MRI	Freesurfer by parcellation of the white surface using Desikan-Killiany parcellation	31968	Area of fusiform in the right hemisphere generated by parcellation of the white surface using Desikan-Killiany parcellation
Cortical surface area of the right inferior parietal cortex	IDP.0689	26829	729.539	mm2	Parietal lobe	cortical area	Structural MRI	Freesurfer by parcellation of the white surface using Desikan-Killiany parcellation	31968	Area of inferiorparietal in the right hemisphere generated by parcellation of the white surface using Desikan-Killiany parcellation
Cortical surface area of the right inferior temporal gyrus	IDP.0690	26830	440.637	mm2	Temporal lobe	cortical area	Structural MRI	Freesurfer by parcellation of the white surface using Desikan-Killiany parcellation	31968	Area of inferiortemporal in the right hemisphere generated by parcellation of the white surface using Desikan-Killiany parcellation
Cortical surface area of the right isthmus-cingulate cortex	IDP.0691	26831	143.983	mm2	Limbic system	cortical area	Structural MRI	Freesurfer by parcellation of the white surface using Desikan-Killiany parcellation	31968	Area of isthmuscingulate in the right hemisphere generated by parcellation of the white surface using Desikan-Killiany parcellation
Cortical surface area of the right lateral occipital cortex	IDP.0692	26832	653.531	mm2	Occipital lobe	cortical area	Structural MRI	Freesurfer by parcellation of the white surface using Desikan-Killiany parcellation	31968	Area of lateraloccipital in the right hemisphere generated by parcellation of the white surface using Desikan-Killiany parcellation
Cortical surface area of the right lateral orbital frontal cortex	IDP.0693	26833	308.756	mm2	Frontal lobe	cortical area	Structural MRI	Freesurfer by parcellation of the white surface using Desikan-Killiany parcellation	31968	Area of lateralorbitofrontal in the right hemisphere generated by parcellation of the white surface using Desikan-Killiany parcellation
Cortical surface area of the right lingual gyrus	IDP.0694	26834	434.148	mm2	Temporal lobe	cortical area	Structural MRI	Freesurfer by parcellation of the white surface using Desikan-Killiany parcellation	31968	Area of lingual in the right hemisphere generated by parcellation of the white surface using Desikan-Killiany parcellation
Cortical surface area of the right medial orbital frontal cortex	IDP.0695	26835	218.474	mm2	Frontal lobe	cortical area	Structural MRI	Freesurfer by parcellation of the white surface using Desikan-Killiany parcellation	31968	Area of medialorbitofrontal in the right hemisphere generated by parcellation of the white surface using Desikan-Killiany parcellation
Cortical surface area of the right middle temporal gyrus	IDP.0696	26836	408.833	mm2	Temporal lobe	cortical area	Structural MRI	Freesurfer by parcellation of the white surface using Desikan-Killiany parcellation	31968	Area of middletemporal in the right hemisphere generated by parcellation of the white surface using Desikan-Killiany parcellation
Cortical surface area of the right parahippocampal gyrus	IDP.0697	26837	75.6712	mm2	Limbic system	cortical area	Structural MRI	Freesurfer by parcellation of the white surface using Desikan-Killiany parcellation	31968	Area of parahippocampal in the right hemisphere generated by parcellation of the white surface using Desikan-Killiany parcellation
Cortical surface area of the right paracentral lobule	IDP.0698	26838	197.353	mm2	Parietal lobe	cortical area	Structural MRI	Freesurfer by parcellation of the white surface using Desikan-Killiany parcellation	31968	Area of paracentral in the right hemisphere generated by parcellation of the white surface using Desikan-Killiany parcellation
Cortical surface area of the right pars opercularis	IDP.0699	26839	189.423	mm2	Frontal lobe	cortical area	Structural MRI	Freesurfer by parcellation of the white surface using Desikan-Killiany parcellation	31968	Area of parsopercularis in the right hemisphere generated by parcellation of the white surface using Desikan-Killiany parcellation
Cortical surface area of the right pars orbitalis	IDP.0700	26840	106.746	mm2	Frontal lobe	cortical area	Structural MRI	Freesurfer by parcellation of the white surface using Desikan-Killiany parcellation	31966	Area of parsorbitalis in the right hemisphere generated by parcellation of the white surface using Desikan-Killiany parcellation
Cortical surface area of the right pars triangularis	IDP.0701	26841	225.269	mm2	Frontal lobe	cortical area	Structural MRI	Freesurfer by parcellation of the white surface using Desikan-Killiany parcellation	31968	Area of parstriangularis in the right hemisphere generated by parcellation of the white surface using Desikan-Killiany parcellation
Cortical surface area of the right pericalcarine cortex	IDP.0702	26842	268.849	mm2	Parietal lobe	cortical area	Structural MRI	Freesurfer by parcellation of the white surface using Desikan-Killiany parcellation	31968	Area of pericalcarine in the right hemisphere generated by parcellation of the white surface using Desikan-Killiany parcellation
Cortical surface area of the right postcentral gyrus	IDP.0703	26843	455.122	mm2	Parietal lobe	cortical area	Structural MRI	Freesurfer by parcellation of the white surface using Desikan-Killiany parcellation	31968	Area of postcentral in the right hemisphere generated by parcellation of the white surface using Desikan-Killiany parcellation
Cortical surface area of the right posterior-cingulate cortex	IDP.0704	26844	178.451	mm2	Limbic system	cortical area	Structural MRI	Freesurfer by parcellation of the white surface using Desikan-Killiany parcellation	31968	Area of posteriorcingulate in the right hemisphere generated by parcellation of the white surface using Desikan-Killiany parcellation
Cortical surface area of the right precentral gyrus	IDP.0705	26845	512.517	mm2	Parietal lobe	cortical area	Structural MRI	Freesurfer by parcellation of the white surface using Desikan-Killiany parcellation	31968	Area of precentral in the right hemisphere generated by parcellation of the white surface using Desikan-Killiany parcellation
Cortical surface area of the right precuneus cortex	IDP.0706	26846	499.818	mm2	Parietal lobe	cortical area	Structural MRI	Freesurfer by parcellation of the white surface using Desikan-Killiany parcellation	31968	Area of precuneus in the right hemisphere generated by parcellation of the white surface using Desikan-Killiany parcellation
Cortical surface area of the right rostral anterior cingulate cortex	IDP.0707	26847	124.847	mm2	Limbic system	cortical area	Structural MRI	Freesurfer by parcellation of the white surface using Desikan-Killiany parcellation	31967	Area of rostralanteriorcingulate in the right hemisphere generated by parcellation of the white surface using Desikan-Killiany parcellation
Cortical surface area of the right rostral middle cingulate cortex	IDP.0708	26848	790.14	mm2	Limbic system	cortical area	Structural MRI	Freesurfer by parcellation of the white surface using Desikan-Killiany parcellation	31968	Area of rostralmiddlefrontal in the right hemisphere generated by parcellation of the white surface using Desikan-Killiany parcellation
Cortical surface area of the right superior frontal gyrus	IDP.0709	26849	852.712	mm2	Frontal lobe	cortical area	Structural MRI	Freesurfer by parcellation of the white surface using Desikan-Killiany parcellation	31968	Area of superiorfrontal in the right hemisphere generated by parcellation of the white surface using Desikan-Killiany parcellation
Cortical surface area of the right superior parietal gyrus	IDP.0710	26850	625.371	mm2	Parietal lobe	cortical area	Structural MRI	Freesurfer by parcellation of the white surface using Desikan-Killiany parcellation	31968	Area of superiorparietal in the right hemisphere generated by parcellation of the white surface using Desikan-Killiany parcellation
Cortical surface area of the right superior temporal gyrus	IDP.0711	26851	388.929	mm2	Temporal lobe	cortical area	Structural MRI	Freesurfer by parcellation of the white surface using Desikan-Killiany parcellation	31968	Area of superiortemporal in the right hemisphere generated by parcellation of the white surface using Desikan-Killiany parcellation
Cortical surface area of the right supramarginal gyrus	IDP.0712	26852	512.462	mm2	Parietal lobe	cortical area	Structural MRI	Freesurfer by parcellation of the white surface using Desikan-Killiany parcellation	31968	Area of supramarginal in the right hemisphere generated by parcellation of the white surface using Desikan-Killiany parcellation
Cortical surface area of the right frontal pole	IDP.0713	26853	37.2595	mm2	Frontal lobe	cortical area	Structural MRI	Freesurfer by parcellation of the white surface using Desikan-Killiany parcellation	31967	Area of frontalpole in the right hemisphere generated by parcellation of the white surface using Desikan-Killiany parcellation
Cortical surface area of the right transverse temporal cortex	IDP.0714	26854	47.9901	mm2	Temporal lobe	cortical area	Structural MRI	Freesurfer by parcellation of the white surface using Desikan-Killiany parcellation	31967	Area of transversetemporal in the right hemisphere generated by parcellation of the white surface using Desikan-Killiany parcellation
Cortical surface area of the right insula	IDP.0715	26855	299.168	mm2	Insula	cortical area	Structural MRI	Freesurfer by parcellation of the white surface using Desikan-Killiany parcellation	31968	Area of insula in the right hemisphere generated by parcellation of the white surface using Desikan-Killiany parcellation
Thickness of the left total hemisphere	IDP.1020	26755	0.120609	mm	Total brain	cortical thickness	Structural MRI	Freesurfer by parcellation of the white surface using Desikan-Killiany parcellation	31968	Mean thickness of GlobalMeanMean thickness in the left hemisphere generated by parcellation of the white surface using Desikan-Killiany parcellation
Thickness of the left banks superior temporal sulcus	IDP.1021	26756	0.186018	mm	Temporal lobe	cortical thickness	Structural MRI	Freesurfer by parcellation of the white surface using Desikan-Killiany parcellation	31968	Mean thickness of bankssts in the left hemisphere generated by parcellation of the white surface using Desikan-Killiany parcellation
Thickness of the left caudal anterior-cingulate cortex	IDP.1022	26757	0.44354	mm	Limbic system	cortical thickness	Structural MRI	Freesurfer by parcellation of the white surface using Desikan-Killiany parcellation	31967	Mean thickness of caudalanteriorcingulate in the left hemisphere generated by parcellation of the white surface using Desikan-Killiany parcellation
Thickness of the left caudal middle frontal gyrus	IDP.1023	26758	0.163911	mm	Frontal lobe	cortical thickness	Structural MRI	Freesurfer by parcellation of the white surface using Desikan-Killiany parcellation	31968	Mean thickness of caudalmiddlefrontal in the left hemisphere generated by parcellation of the white surface using Desikan-Killiany parcellation
Thickness of the left cuneus cortex	IDP.1024	26759	0.152325	mm	Occipital lobe	cortical thickness	Structural MRI	Freesurfer by parcellation of the white surface using Desikan-Killiany parcellation	31968	Mean thickness of cuneus in the left hemisphere generated by parcellation of the white surface using Desikan-Killiany parcellation
Thickness of the left entorhinal cortex	IDP.1025	26760	0.317284	mm	Temporal lobe	cortical thickness	Structural MRI	Freesurfer by parcellation of the white surface using Desikan-Killiany parcellation	31967	Mean thickness of entorhinal in the left hemisphere generated by parcellation of the white surface using Desikan-Killiany parcellation
Thickness of the left fusiform gyrus	IDP.1026	26761	0.141127	mm	Temporal lobe	cortical thickness	Structural MRI	Freesurfer by parcellation of the white surface using Desikan-Killiany parcellation	31968	Mean thickness of fusiform in the left hemisphere generated by parcellation of the white surface using Desikan-Killiany parcellation
Thickness of the left inferior parietal cortex	IDP.1027	26762	0.137199	mm	Parietal lobe	cortical thickness	Structural MRI	Freesurfer by parcellation of the white surface using Desikan-Killiany parcellation	31968	Mean thickness of inferiorparietal in the left hemisphere generated by parcellation of the white surface using Desikan-Killiany parcellation
Thickness of the left inferior temporal gyrus	IDP.1028	26763	0.149404	mm	Temporal lobe	cortical thickness	Structural MRI	Freesurfer by parcellation of the white surface using Desikan-Killiany parcellation	31968	Mean thickness of inferiortemporal in the left hemisphere generated by parcellation of the white surface using Desikan-Killiany parcellation
Thickness of the left isthmus-cingulate cortex	IDP.1029	26764	0.184396	mm	Limbic system	cortical thickness	Structural MRI	Freesurfer by parcellation of the white surface using Desikan-Killiany parcellation	31967	Mean thickness of isthmuscingulate in the left hemisphere generated by parcellation of the white surface using Desikan-Killiany parcellation
Thickness of the left lateral occipital cortex	IDP.1030	26765	0.130516	mm	Occipital lobe	cortical thickness	Structural MRI	Freesurfer by parcellation of the white surface using Desikan-Killiany parcellation	31968	Mean thickness of lateraloccipital in the left hemisphere generated by parcellation of the white surface using Desikan-Killiany parcellation
Thickness of the left lateral orbital frontal cortex	IDP.1031	26766	0.145191	mm	Frontal lobe	cortical thickness	Structural MRI	Freesurfer by parcellation of the white surface using Desikan-Killiany parcellation	31967	Mean thickness of lateralorbitofrontal in the left hemisphere generated by parcellation of the white surface using Desikan-Killiany parcellation
Thickness of the left lingual gyrus	IDP.1032	26767	0.150536	mm	Temporal lobe	cortical thickness	Structural MRI	Freesurfer by parcellation of the white surface using Desikan-Killiany parcellation	31968	Mean thickness of lingual in the left hemisphere generated by parcellation of the white surface using Desikan-Killiany parcellation
Thickness of the left medial orbital frontal cortex	IDP.1033	26768	0.163345	mm	Frontal lobe	cortical thickness	Structural MRI	Freesurfer by parcellation of the white surface using Desikan-Killiany parcellation	31968	Mean thickness of medialorbitofrontal in the left hemisphere generated by parcellation of the white surface using Desikan-Killiany parcellation
Thickness of the left middle temporal gyrus	IDP.1034	26769	0.16967	mm	Temporal lobe	cortical thickness	Structural MRI	Freesurfer by parcellation of the white surface using Desikan-Killiany parcellation	31968	Mean thickness of middletemporal in the left hemisphere generated by parcellation of the white surface using Desikan-Killiany parcellation
Thickness of the left parahippocampal gyrus	IDP.1035	26770	0.310356	mm	Limbic system	cortical thickness	Structural MRI	Freesurfer by parcellation of the white surface using Desikan-Killiany parcellation	31968	Mean thickness of parahippocampal in the left hemisphere generated by parcellation of the white surface using Desikan-Killiany parcellation
Thickness of the left paracentral lobule	IDP.1036	26771	0.208914	mm	Parietal lobe	cortical thickness	Structural MRI	Freesurfer by parcellation of the white surface using Desikan-Killiany parcellation	31968	Mean thickness of paracentral in the left hemisphere generated by parcellation of the white surface using Desikan-Killiany parcellation
Thickness of the left pars opercularis	IDP.1037	26772	0.158945	mm	Frontal lobe	cortical thickness	Structural MRI	Freesurfer by parcellation of the white surface using Desikan-Killiany parcellation	31968	Mean thickness of parsopercularis in the left hemisphere generated by parcellation of the white surface using Desikan-Killiany parcellation
Thickness of the left pars orbitalis	IDP.1038	26773	0.190283	mm	Frontal lobe	cortical thickness	Structural MRI	Freesurfer by parcellation of the white surface using Desikan-Killiany parcellation	31967	Mean thickness of parsorbitalis in the left hemisphere generated by parcellation of the white surface using Desikan-Killiany parcellation
Thickness of the left pars triangularis	IDP.1039	26774	0.159849	mm	Frontal lobe	cortical thickness	Structural MRI	Freesurfer by parcellation of the white surface using Desikan-Killiany parcellation	31968	Mean thickness of parstriangularis in the left hemisphere generated by parcellation of the white surface using Desikan-Killiany parcellation
Thickness of the left pericalcarine cortex	IDP.1040	26775	0.145346	mm	Parietal lobe	cortical thickness	Structural MRI	Freesurfer by parcellation of the white surface using Desikan-Killiany parcellation	31968	Mean thickness of pericalcarine in the left hemisphere generated by parcellation of the white surface using Desikan-Killiany parcellation
Thickness of the left postcentral gyrus	IDP.1041	26776	0.154381	mm	Parietal lobe	cortical thickness	Structural MRI	Freesurfer by parcellation of the white surface using Desikan-Killiany parcellation	31968	Mean thickness of postcentral in the left hemisphere generated by parcellation of the white surface using Desikan-Killiany parcellation
Thickness of the left posterior-cingulate cortex	IDP.1042	26777	0.192558	mm	Limbic system	cortical thickness	Structural MRI	Freesurfer by parcellation of the white surface using Desikan-Killiany parcellation	31967	Mean thickness of posteriorcingulate in the left hemisphere generated by parcellation of the white surface using Desikan-Killiany parcellation
Thickness of the left precentral gyrus	IDP.1043	26778	0.191669	mm	Parietal lobe	cortical thickness	Structural MRI	Freesurfer by parcellation of the white surface using Desikan-Killiany parcellation	31968	Mean thickness of precentral in the left hemisphere generated by parcellation of the white surface using Desikan-Killiany parcellation
Thickness of the left precuneus cortex	IDP.1044	26779	0.149811	mm	Parietal lobe	cortical thickness	Structural MRI	Freesurfer by parcellation of the white surface using Desikan-Killiany parcellation	31968	Mean thickness of precuneus in the left hemisphere generated by parcellation of the white surface using Desikan-Killiany parcellation
Thickness of the left rostral anterior cingulate cortex	IDP.1045	26780	0.228635	mm	Limbic system	cortical thickness	Structural MRI	Freesurfer by parcellation of the white surface using Desikan-Killiany parcellation	31967	Mean thickness of rostralanteriorcingulate in the left hemisphere generated by parcellation of the white surface using Desikan-Killiany parcellation
Thickness of the left rostral middle cingulate cortex	IDP.1046	26781	0.139317	mm	Limbic system	cortical thickness	Structural MRI	Freesurfer by parcellation of the white surface using Desikan-Killiany parcellation	31968	Mean thickness of rostralmiddlefrontal in the left hemisphere generated by parcellation of the white surface using Desikan-Killiany parcellation
Thickness of the left superior frontal gyrus	IDP.1047	26782	0.162576	mm	Frontal lobe	cortical thickness	Structural MRI	Freesurfer by parcellation of the white surface using Desikan-Killiany parcellation	31968	Mean thickness of superiorfrontal in the left hemisphere generated by parcellation of the white surface using Desikan-Killiany parcellation
Thickness of the left superior parietal gyrus	IDP.1048	26783	0.144464	mm	Parietal lobe	cortical thickness	Structural MRI	Freesurfer by parcellation of the white surface using Desikan-Killiany parcellation	31968	Mean thickness of superiorparietal in the left hemisphere generated by parcellation of the white surface using Desikan-Killiany parcellation
Thickness of the left superior temporal gyrus	IDP.1049	26784	0.182058	mm	Temporal lobe	cortical thickness	Structural MRI	Freesurfer by parcellation of the white surface using Desikan-Killiany parcellation	31968	Mean thickness of superiortemporal in the left hemisphere generated by parcellation of the white surface using Desikan-Killiany parcellation
Thickness of the left supramarginal gyrus	IDP.1050	26785	0.153109	mm	Parietal lobe	cortical thickness	Structural MRI	Freesurfer by parcellation of the white surface using Desikan-Killiany parcellation	31968	Mean thickness of supramarginal in the left hemisphere generated by parcellation of the white surface using Desikan-Killiany parcellation
Thickness of the left frontal pole	IDP.1051	26786	0.247486	mm	Frontal lobe	cortical thickness	Structural MRI	Freesurfer by parcellation of the white surface using Desikan-Killiany parcellation	31967	Mean thickness of frontalpole in the left hemisphere generated by parcellation of the white surface using Desikan-Killiany parcellation
Thickness of the left transverse temporal cortex	IDP.1052	26787	0.252365	mm	Temporal lobe	cortical thickness	Structural MRI	Freesurfer by parcellation of the white surface using Desikan-Killiany parcellation	31968	Mean thickness of transversetemporal in the left hemisphere generated by parcellation of the white surface using Desikan-Killiany parcellation
Thickness of the left insula	IDP.1053	26788	0.18358	mm	Insula	cortical thickness	Structural MRI	Freesurfer by parcellation of the white surface using Desikan-Killiany parcellation	31968	Mean thickness of insula in the left hemisphere generated by parcellation of the white surface using Desikan-Killiany parcellation
Thickness of the right total hemisphere	IDP.1054	26856	0.119902	mm	Total brain	cortical thickness	Structural MRI	Freesurfer by parcellation of the white surface using Desikan-Killiany parcellation	31968	Mean thickness of GlobalMeanMean thickness in the right hemisphere generated by parcellation of the white surface using Desikan-Killiany parcellation
Thickness of the right banks superior temporal sulcus	IDP.1055	26857	0.194643	mm	Temporal lobe	cortical thickness	Structural MRI	Freesurfer by parcellation of the white surface using Desikan-Killiany parcellation	31968	Mean thickness of bankssts in the right hemisphere generated by parcellation of the white surface using Desikan-Killiany parcellation
Thickness of the right caudal anterior-cingulate cortex	IDP.1056	26858	0.356191	mm	Limbic system	cortical thickness	Structural MRI	Freesurfer by parcellation of the white surface using Desikan-Killiany parcellation	31966	Mean thickness of caudalanteriorcingulate in the right hemisphere generated by parcellation of the white surface using Desikan-Killiany parcellation
Thickness of the right caudal middle frontal gyrus	IDP.1057	26859	0.163241	mm	Frontal lobe	cortical thickness	Structural MRI	Freesurfer by parcellation of the white surface using Desikan-Killiany parcellation	31968	Mean thickness of caudalmiddlefrontal in the right hemisphere generated by parcellation of the white surface using Desikan-Killiany parcellation
Thickness of the right cuneus cortex	IDP.1058	26860	0.144817	mm	Occipital lobe	cortical thickness	Structural MRI	Freesurfer by parcellation of the white surface using Desikan-Killiany parcellation	31968	Mean thickness of cuneus in the right hemisphere generated by parcellation of the white surface using Desikan-Killiany parcellation
Thickness of the right entorhinal cortex	IDP.1059	26861	0.342982	mm	Temporal lobe	cortical thickness	Structural MRI	Freesurfer by parcellation of the white surface using Desikan-Killiany parcellation	31968	Mean thickness of entorhinal in the right hemisphere generated by parcellation of the white surface using Desikan-Killiany parcellation
Thickness of the right fusiform gyrus	IDP.1060	26862	0.149577	mm	Temporal lobe	cortical thickness	Structural MRI	Freesurfer by parcellation of the white surface using Desikan-Killiany parcellation	31968	Mean thickness of fusiform in the right hemisphere generated by parcellation of the white surface using Desikan-Killiany parcellation
Thickness of the right inferior parietal cortex	IDP.1061	26863	0.144846	mm	Parietal lobe	cortical thickness	Structural MRI	Freesurfer by parcellation of the white surface using Desikan-Killiany parcellation	31968	Mean thickness of inferiorparietal in the right hemisphere generated by parcellation of the white surface using Desikan-Killiany parcellation
Thickness of the right inferior temporal gyrus	IDP.1062	26864	0.145647	mm	Temporal lobe	cortical thickness	Structural MRI	Freesurfer by parcellation of the white surface using Desikan-Killiany parcellation	31968	Mean thickness of inferiortemporal in the right hemisphere generated by parcellation of the white surface using Desikan-Killiany parcellation
Thickness of the right isthmus-cingulate cortex	IDP.1063	26865	0.198673	mm	Limbic system	cortical thickness	Structural MRI	Freesurfer by parcellation of the white surface using Desikan-Killiany parcellation	31968	Mean thickness of isthmuscingulate in the right hemisphere generated by parcellation of the white surface using Desikan-Killiany parcellation
Thickness of the right lateral occipital cortex	IDP.1064	26866	0.137386	mm	Occipital lobe	cortical thickness	Structural MRI	Freesurfer by parcellation of the white surface using Desikan-Killiany parcellation	31968	Mean thickness of lateraloccipital in the right hemisphere generated by parcellation of the white surface using Desikan-Killiany parcellation
Thickness of the right lateral orbital frontal cortex	IDP.1065	26867	0.154723	mm	Frontal lobe	cortical thickness	Structural MRI	Freesurfer by parcellation of the white surface using Desikan-Killiany parcellation	31968	Mean thickness of lateralorbitofrontal in the right hemisphere generated by parcellation of the white surface using Desikan-Killiany parcellation
Thickness of the right lingual gyrus	IDP.1066	26868	0.149476	mm	Temporal lobe	cortical thickness	Structural MRI	Freesurfer by parcellation of the white surface using Desikan-Killiany parcellation	31968	Mean thickness of lingual in the right hemisphere generated by parcellation of the white surface using Desikan-Killiany parcellation
Thickness of the right medial orbital frontal cortex	IDP.1067	26869	0.164889	mm	Frontal lobe	cortical thickness	Structural MRI	Freesurfer by parcellation of the white surface using Desikan-Killiany parcellation	31968	Mean thickness of medialorbitofrontal in the right hemisphere generated by parcellation of the white surface using Desikan-Killiany parcellation
Thickness of the right middle temporal gyrus	IDP.1068	26870	0.159507	mm	Temporal lobe	cortical thickness	Structural MRI	Freesurfer by parcellation of the white surface using Desikan-Killiany parcellation	31968	Mean thickness of middletemporal in the right hemisphere generated by parcellation of the white surface using Desikan-Killiany parcellation
Thickness of the right parahippocampal gyrus	IDP.1069	26871	0.263104	mm	Limbic system	cortical thickness	Structural MRI	Freesurfer by parcellation of the white surface using Desikan-Killiany parcellation	31968	Mean thickness of parahippocampal in the right hemisphere generated by parcellation of the white surface using Desikan-Killiany parcellation
Thickness of the right paracentral lobule	IDP.1070	26872	0.204183	mm	Parietal lobe	cortical thickness	Structural MRI	Freesurfer by parcellation of the white surface using Desikan-Killiany parcellation	31968	Mean thickness of paracentral in the right hemisphere generated by parcellation of the white surface using Desikan-Killiany parcellation
Thickness of the right pars opercularis	IDP.1071	26873	0.158693	mm	Frontal lobe	cortical thickness	Structural MRI	Freesurfer by parcellation of the white surface using Desikan-Killiany parcellation	31968	Mean thickness of parsopercularis in the right hemisphere generated by parcellation of the white surface using Desikan-Killiany parcellation
Thickness of the right pars orbitalis	IDP.1072	26874	0.187241	mm	Frontal lobe	cortical thickness	Structural MRI	Freesurfer by parcellation of the white surface using Desikan-Killiany parcellation	31966	Mean thickness of parsorbitalis in the right hemisphere generated by parcellation of the white surface using Desikan-Killiany parcellation
Thickness of the right pars triangularis	IDP.1073	26875	0.152487	mm	Frontal lobe	cortical thickness	Structural MRI	Freesurfer by parcellation of the white surface using Desikan-Killiany parcellation	31968	Mean thickness of parstriangularis in the right hemisphere generated by parcellation of the white surface using Desikan-Killiany parcellation
Thickness of the right pericalcarine cortex	IDP.1074	26876	0.144692	mm	Parietal lobe	cortical thickness	Structural MRI	Freesurfer by parcellation of the white surface using Desikan-Killiany parcellation	31968	Mean thickness of pericalcarine in the right hemisphere generated by parcellation of the white surface using Desikan-Killiany parcellation
Thickness of the right postcentral gyrus	IDP.1075	26877	0.162125	mm	Parietal lobe	cortical thickness	Structural MRI	Freesurfer by parcellation of the white surface using Desikan-Killiany parcellation	31968	Mean thickness of postcentral in the right hemisphere generated by parcellation of the white surface using Desikan-Killiany parcellation
Thickness of the right posterior-cingulate cortex	IDP.1076	26878	0.195868	mm	Limbic system	cortical thickness	Structural MRI	Freesurfer by parcellation of the white surface using Desikan-Killiany parcellation	31968	Mean thickness of posteriorcingulate in the right hemisphere generated by parcellation of the white surface using Desikan-Killiany parcellation
Thickness of the right precentral gyrus	IDP.1077	26879	0.195078	mm	Parietal lobe	cortical thickness	Structural MRI	Freesurfer by parcellation of the white surface using Desikan-Killiany parcellation	31968	Mean thickness of precentral in the right hemisphere generated by parcellation of the white surface using Desikan-Killiany parcellation
Thickness of the right precuneus cortex	IDP.1078	26880	0.147178	mm	Parietal lobe	cortical thickness	Structural MRI	Freesurfer by parcellation of the white surface using Desikan-Killiany parcellation	31968	Mean thickness of precuneus in the right hemisphere generated by parcellation of the white surface using Desikan-Killiany parcellation
Thickness of the right rostral anterior cingulate cortex	IDP.1079	26881	0.228448	mm	Limbic system	cortical thickness	Structural MRI	Freesurfer by parcellation of the white surface using Desikan-Killiany parcellation	31967	Mean thickness of rostralanteriorcingulate in the right hemisphere generated by parcellation of the white surface using Desikan-Killiany parcellation
Thickness of the right rostral middle cingulate cortex	IDP.1080	26882	0.133613	mm	Limbic system	cortical thickness	Structural MRI	Freesurfer by parcellation of the white surface using Desikan-Killiany parcellation	31968	Mean thickness of rostralmiddlefrontal in the right hemisphere generated by parcellation of the white surface using Desikan-Killiany parcellation
Thickness of the right superior frontal gyrus	IDP.1081	26883	0.158267	mm	Frontal lobe	cortical thickness	Structural MRI	Freesurfer by parcellation of the white surface using Desikan-Killiany parcellation	31968	Mean thickness of superiorfrontal in the right hemisphere generated by parcellation of the white surface using Desikan-Killiany parcellation
Thickness of the right superior parietal gyrus	IDP.1082	26884	0.146891	mm	Parietal lobe	cortical thickness	Structural MRI	Freesurfer by parcellation of the white surface using Desikan-Killiany parcellation	31968	Mean thickness of superiorparietal in the right hemisphere generated by parcellation of the white surface using Desikan-Killiany parcellation
Thickness of the right superior temporal gyrus	IDP.1083	26885	0.178663	mm	Temporal lobe	cortical thickness	Structural MRI	Freesurfer by parcellation of the white surface using Desikan-Killiany parcellation	31968	Mean thickness of superiortemporal in the right hemisphere generated by parcellation of the white surface using Desikan-Killiany parcellation
Thickness of the right supramarginal gyrus	IDP.1084	26886	0.15567	mm	Parietal lobe	cortical thickness	Structural MRI	Freesurfer by parcellation of the white surface using Desikan-Killiany parcellation	31968	Mean thickness of supramarginal in the right hemisphere generated by parcellation of the white surface using Desikan-Killiany parcellation
Thickness of the right frontal pole	IDP.1085	26887	0.245895	mm	Frontal lobe	cortical thickness	Structural MRI	Freesurfer by parcellation of the white surface using Desikan-Killiany parcellation	31967	Mean thickness of frontalpole in the right hemisphere generated by parcellation of the white surface using Desikan-Killiany parcellation
Thickness of the right transverse temporal cortex	IDP.1086	26888	0.266778	mm	Temporal lobe	cortical thickness	Structural MRI	Freesurfer by parcellation of the white surface using Desikan-Killiany parcellation	31967	Mean thickness of transversetemporal in the right hemisphere generated by parcellation of the white surface using Desikan-Killiany parcellation
Thickness of the right insula	IDP.1087	26889	0.184001	mm	Insula	cortical thickness	Structural MRI	Freesurfer by parcellation of the white surface using Desikan-Killiany parcellation	31968	Mean thickness of insula in the right hemisphere generated by parcellation of the white surface using Desikan-Killiany parcellation
FA in the middle cerebellar peduncle	IDP.1452	25056	0.0234988	AU	Brainstem tracts	WM tract FA	Diffusion MRI	Diffusion-weighted imaging (dMRI TBSS)	31356	Mean FA (fractional anisotropy) in middle cerebellar peduncle on FA skeleton (from dMRI data)
FA in the pontine crossing tract	IDP.1453	25057	0.0330967	AU	Projection fibers	WM tract FA	Diffusion MRI	Diffusion-weighted imaging (dMRI TBSS)	31356	Mean FA (fractional anisotropy) in pontine crossing tract on FA skeleton (from dMRI data)
FA in the genu of corpus callosum	IDP.1454	25058	0.0353983	AU	Commissural fibers	WM tract FA	Diffusion MRI	Diffusion-weighted imaging (dMRI TBSS)	31356	Mean FA (fractional anisotropy) in genu of corpus callosum on FA skeleton (from dMRI data)
FA in the body of corpus callosum	IDP.1455	25059	0.0300118	AU	Commissural fibers	WM tract FA	Diffusion MRI	Diffusion-weighted imaging (dMRI TBSS)	31356	Mean FA (fractional anisotropy) in body of corpus callosum on FA skeleton (from dMRI data)
FA in the fornix	IDP.1456	25060	0.0223896	AU	Commissural fibers	WM tract FA	Diffusion MRI	Diffusion-weighted imaging (dMRI TBSS)	31356	Mean FA (fractional anisotropy) in splenium of corpus callosum on FA skeleton (from dMRI data)
FA in the fornix	IDP.1457	25061	0.0883009	AU	Association fibers	WM tract FA	Diffusion MRI	Diffusion-weighted imaging (dMRI TBSS)	31356	Mean FA (fractional anisotropy) in fornix on FA skeleton (from dMRI data)
FA in the right corticospinal tract	IDP.1458	25062	0.0379739	AU	Brainstem tracts	WM tract FA	Diffusion MRI	Diffusion-weighted imaging (dMRI TBSS)	31356	Mean FA (fractional anisotropy) in corticospinal tract (right) on FA skeleton (from dMRI data)
FA in the left corticospinal tract	IDP.1459	25063	0.0345846	AU	Brainstem tracts	WM tract FA	Diffusion MRI	Diffusion-weighted imaging (dMRI TBSS)	31356	Mean FA (fractional anisotropy) in corticospinal tract (left) on FA skeleton (from dMRI data)
FA in the right medial lemniscus	IDP.1460	25064	0.0290037	AU	Brainstem tracts	WM tract FA	Diffusion MRI	Diffusion-weighted imaging (dMRI TBSS)	31356	Mean FA (fractional anisotropy) in medial lemniscus (right) on FA skeleton (from dMRI data)
FA in the left medial lemniscus	IDP.1461	25065	0.0293207	AU	Brainstem tracts	WM tract FA	Diffusion MRI	Diffusion-weighted imaging (dMRI TBSS)	31356	Mean FA (fractional anisotropy) in medial lemniscus (left) on FA skeleton (from dMRI data)
FA in the right inferior cerebellar peduncle	IDP.1462	25066	0.0316264	AU	Brainstem tracts	WM tract FA	Diffusion MRI	Diffusion-weighted imaging (dMRI TBSS)	31356	Mean FA (fractional anisotropy) in inferior cerebellar peduncle (right) on FA skeleton (from dMRI data)
FA in the left inferior cerebellar peduncle	IDP.1463	25067	0.0324017	AU	Brainstem tracts	WM tract FA	Diffusion MRI	Diffusion-weighted imaging (dMRI TBSS)	31356	Mean FA (fractional anisotropy) in inferior cerebellar peduncle (left) on FA skeleton (from dMRI data)
FA in the right superior cerebellar peduncle	IDP.1464	25068	0.0261489	AU	Brainstem tracts	WM tract FA	Diffusion MRI	Diffusion-weighted imaging (dMRI TBSS)	31356	Mean FA (fractional anisotropy) in superior cerebellar peduncle (right) on FA skeleton (from dMRI data)
FA in the left superior cerebellar peduncle	IDP.1465	25069	0.0264422	AU	Brainstem tracts	WM tract FA	Diffusion MRI	Diffusion-weighted imaging (dMRI TBSS)	31356	Mean FA (fractional anisotropy) in superior cerebellar peduncle (left) on FA skeleton (from dMRI data)
FA in the right cerebral peduncle	IDP.1466	25070	0.0246757	AU	Brainstem tracts	WM tract FA	Diffusion MRI	Diffusion-weighted imaging (dMRI TBSS)	31356	Mean FA (fractional anisotropy) in cerebral peduncle (right) on FA skeleton (from dMRI data)
FA in the left cerebral peduncle	IDP.1467	25071	0.024463	AU	Brainstem tracts	WM tract FA	Diffusion MRI	Diffusion-weighted imaging (dMRI TBSS)	31356	Mean FA (fractional anisotropy) in cerebral peduncle (left) on FA skeleton (from dMRI data)
FA in the anterior limb of the right internal capsule	IDP.1468	25072	0.0259625	AU	Projection fibers	WM tract FA	Diffusion MRI	Diffusion-weighted imaging (dMRI TBSS)	31356	Mean FA (fractional anisotropy) in anterior limb of internal capsule (right) on FA skeleton (from dMRI data)
FA in the anterior limb of the left internal capsule	IDP.1469	25073	0.0254686	AU	Projection fibers	WM tract FA	Diffusion MRI	Diffusion-weighted imaging (dMRI TBSS)	31356	Mean FA (fractional anisotropy) in anterior limb of internal capsule (left) on FA skeleton (from dMRI data)
FA in the posterior limb of the right internal capsule	IDP.1470	25074	0.0249831	AU	Projection fibers	WM tract FA	Diffusion MRI	Diffusion-weighted imaging (dMRI TBSS)	31356	Mean FA (fractional anisotropy) in posterior limb of internal capsule (right) on FA skeleton (from dMRI data)
FA in the posterior limb of the left internal capsule	IDP.1471	25075	0.0249381	AU	Projection fibers	WM tract FA	Diffusion MRI	Diffusion-weighted imaging (dMRI TBSS)	31356	Mean FA (fractional anisotropy) in posterior limb of internal capsule (left) on FA skeleton (from dMRI data)
FA in the retrolenticular part of the right internal capsule	IDP.1472	25076	0.0285535	AU	Projection fibers	WM tract FA	Diffusion MRI	Diffusion-weighted imaging (dMRI TBSS)	31356	Mean FA (fractional anisotropy) in retrolenticular part of internal capsule (right) on FA skeleton (from dMRI data)
FA in the retrolenticular part of the left internal capsule	IDP.1473	25077	0.0272591	AU	Projection fibers	WM tract FA	Diffusion MRI	Diffusion-weighted imaging (dMRI TBSS)	31356	Mean FA (fractional anisotropy) in retrolenticular part of internal capsule (left) on FA skeleton (from dMRI data)
FA in the right anterior corona radiata	IDP.1474	25078	0.031741	AU	Projection fibers	WM tract FA	Diffusion MRI	Diffusion-weighted imaging (dMRI TBSS)	31356	Mean FA (fractional anisotropy) in anterior corona radiata (right) on FA skeleton (from dMRI data)
FA in the left anterior corona radiata	IDP.1475	25079	0.0315136	AU	Projection fibers	WM tract FA	Diffusion MRI	Diffusion-weighted imaging (dMRI TBSS)	31356	Mean FA (fractional anisotropy) in anterior corona radiata (left) on FA skeleton (from dMRI data)
FA in the right superior corona radiata	IDP.1476	25080	0.0252378	AU	Projection fibers	WM tract FA	Diffusion MRI	Diffusion-weighted imaging (dMRI TBSS)	31356	Mean FA (fractional anisotropy) in superior corona radiata (right) on FA skeleton (from dMRI data)
FA in the left superior corona radiata	IDP.1477	25081	0.0254272	AU	Projection fibers	WM tract FA	Diffusion MRI	Diffusion-weighted imaging (dMRI TBSS)	31356	Mean FA (fractional anisotropy) in superior corona radiata (left) on FA skeleton (from dMRI data)
FA in the right posterior corona radiata	IDP.1478	25082	0.0275837	AU	Projection fibers	WM tract FA	Diffusion MRI	Diffusion-weighted imaging (dMRI TBSS)	31356	Mean FA (fractional anisotropy) in posterior corona radiata (right) on FA skeleton (from dMRI data)
FA in the left posterior corona radiata	IDP.1479	25083	0.0256749	AU	Projection fibers	WM tract FA	Diffusion MRI	Diffusion-weighted imaging (dMRI TBSS)	31356	Mean FA (fractional anisotropy) in posterior corona radiata (left) on FA skeleton (from dMRI data)
FA in the right posterior thalamic radiation	IDP.1480	25084	0.0347439	AU	Projection fibers	WM tract FA	Diffusion MRI	Diffusion-weighted imaging (dMRI TBSS)	31356	Mean FA (fractional anisotropy) in posterior thalamic radiation (right) on FA skeleton (from dMRI data)
FA in the left posterior thalamic radiation	IDP.1481	25085	0.0356706	AU	Projection fibers	WM tract FA	Diffusion MRI	Diffusion-weighted imaging (dMRI TBSS)	31356	Mean FA (fractional anisotropy) in posterior thalamic radiation (left) on FA skeleton (from dMRI data)
FA in the right sagittal stratum	IDP.1482	25086	0.0310149	AU	Association fibers	WM tract FA	Diffusion MRI	Diffusion-weighted imaging (dMRI TBSS)	31356	Mean FA (fractional anisotropy) in sagittal stratum (right) on FA skeleton (from dMRI data)
FA in the left sagittal stratum	IDP.1483	25087	0.0322057	AU	Association fibers	WM tract FA	Diffusion MRI	Diffusion-weighted imaging (dMRI TBSS)	31356	Mean FA (fractional anisotropy) in sagittal stratum (left) on FA skeleton (from dMRI data)
FA in the right external capsule	IDP.1484	25088	0.0234748	AU	Association fibers	WM tract FA	Diffusion MRI	Diffusion-weighted imaging (dMRI TBSS)	31356	Mean FA (fractional anisotropy) in external capsule (right) on FA skeleton (from dMRI data)
FA in the left external capsule	IDP.1485	25089	0.0253148	AU	Association fibers	WM tract FA	Diffusion MRI	Diffusion-weighted imaging (dMRI TBSS)	31356	Mean FA (fractional anisotropy) in external capsule (left) on FA skeleton (from dMRI data)
FA in the right cingulum cingulate gyrus part	IDP.1486	25090	0.0338402	AU	Limbic system fibers	WM tract FA	Diffusion MRI	Diffusion-weighted imaging (dMRI TBSS)	31356	Mean FA (fractional anisotropy) in cingulum cingulate gyrus (right) on FA skeleton (from dMRI data)
FA in the left cingulum cingulate gyrus part	IDP.1487	25091	0.0328539	AU	Limbic system fibers	WM tract FA	Diffusion MRI	Diffusion-weighted imaging (dMRI TBSS)	31356	Mean FA (fractional anisotropy) in cingulum cingulate gyrus (left) on FA skeleton (from dMRI data)
FA in the right cingulum hippocampus	IDP.1488	25092	0.036146	AU	Limbic system fibers	WM tract FA	Diffusion MRI	Diffusion-weighted imaging (dMRI TBSS)	31356	Mean FA (fractional anisotropy) in cingulum hippocampus (right) on FA skeleton (from dMRI data)
FA in the left cingulum hippocampus	IDP.1489	25093	0.035586	AU	Limbic system fibers	WM tract FA	Diffusion MRI	Diffusion-weighted imaging (dMRI TBSS)	31356	Mean FA (fractional anisotropy) in cingulum hippocampus (left) on FA skeleton (from dMRI data)
FA in the right fornix and stria terminalis	IDP.1490	25094	0.0360168	AU	Association fibers	WM tract FA	Diffusion MRI	Diffusion-weighted imaging (dMRI TBSS)	31356	Mean FA (fractional anisotropy) in fornix cres+stria terminalis (right) on FA skeleton (from dMRI data)
FA in the left fornix and stria terminalis	IDP.1491	25095	0.037645	AU	Association fibers	WM tract FA	Diffusion MRI	Diffusion-weighted imaging (dMRI TBSS)	31356	Mean FA (fractional anisotropy) in fornix cres+stria terminalis (left) on FA skeleton (from dMRI data)
FA in the right superior longitudinal fasciculus	IDP.1492	25096	0.0267103	AU	Association fibers	WM tract FA	Diffusion MRI	Diffusion-weighted imaging (dMRI TBSS)	31356	Mean FA (fractional anisotropy) in superior longitudinal fasciculus (right) on FA skeleton (from dMRI data)
FA in the left superior longitudinal fasciculus	IDP.1493	25097	0.0270324	AU	Association fibers	WM tract FA	Diffusion MRI	Diffusion-weighted imaging (dMRI TBSS)	31356	Mean FA (fractional anisotropy) in superior longitudinal fasciculus (left) on FA skeleton (from dMRI data)
FA in the right superior fronto-occipital fasciculus	IDP.1494	25098	0.0439685	AU	Association fibers	WM tract FA	Diffusion MRI	Diffusion-weighted imaging (dMRI TBSS)	31356	Mean FA (fractional anisotropy) in superior fronto-occipital fasciculus (right) on FA skeleton (from dMRI data)
FA in the left superior fronto-occipital fasciculus	IDP.1495	25099	0.0461296	AU	Association fibers	WM tract FA	Diffusion MRI	Diffusion-weighted imaging (dMRI TBSS)	31356	Mean FA (fractional anisotropy) in superior fronto-occipital fasciculus (left) on FA skeleton (from dMRI data)
FA in the right uncinate fasciculus	IDP.1496	25100	0.0378757	AU	Association fibers	WM tract FA	Diffusion MRI	Diffusion-weighted imaging (dMRI TBSS)	31356	Mean FA (fractional anisotropy) in uncinate fasciculus (right) on FA skeleton (from dMRI data)
FA in the left uncinate fasciculus	IDP.1497	25101	0.0389261	AU	Association fibers	WM tract FA	Diffusion MRI	Diffusion-weighted imaging (dMRI TBSS)	31356	Mean FA (fractional anisotropy) in uncinate fasciculus (left) on FA skeleton (from dMRI data)
FA in the right tapetum	IDP.1498	25102	0.0683927	AU	Commissural fibers	WM tract FA	Diffusion MRI	Diffusion-weighted imaging (dMRI TBSS)	31356	Mean FA (fractional anisotropy) in tapetum (right) on FA skeleton (from dMRI data)
FA in the left tapetum	IDP.1499	25103	0.0662724	AU	Commissural fibers	WM tract FA	Diffusion MRI	Diffusion-weighted imaging (dMRI TBSS)	31356	Mean FA (fractional anisotropy) in tapetum (left) on FA skeleton (from dMRI data)
FA in the left acoustic radiation	IDP.1500	25488	0.0242757	AU	Projection fibers	WM tract FA	Diffusion MRI	Diffusion-weighted imaging (dMRI Probtrack)	31355	Weighted-mean FA (fractional anisotropy) in tract left acoustic radiation (from dMRI data)
FA in the right acoustic radiation	IDP.1501	25489	0.0235005	AU	Projection fibers	WM tract FA	Diffusion MRI	Diffusion-weighted imaging (dMRI Probtrack)	31355	Weighted-mean FA (fractional anisotropy) in tract right acoustic radiation (from dMRI data)
FA in the left anterior thalamic radiation	IDP.1502	25490	0.0207692	AU	Projection fibers	WM tract FA	Diffusion MRI	Diffusion-weighted imaging (dMRI Probtrack)	31355	Weighted-mean FA (fractional anisotropy) in tract left anterior thalamic radiation (from dMRI data)
FA in the right anterior thalamic radiation	IDP.1503	25491	0.0201333	AU	Projection fibers	WM tract FA	Diffusion MRI	Diffusion-weighted imaging (dMRI Probtrack)	31355	Weighted-mean FA (fractional anisotropy) in tract right anterior thalamic radiation (from dMRI data)
FA in the forceps major	IDP.1510	25498	0.0294618	AU	Commissural fibers	WM tract FA	Diffusion MRI	Diffusion-weighted imaging (dMRI Probtrack)	31355	Weighted-mean FA (fractional anisotropy) in tract forceps major (from dMRI data)
FA in the forceps minor	IDP.1511	25499	0.022763	AU	Commissural fibers	WM tract FA	Diffusion MRI	Diffusion-weighted imaging (dMRI Probtrack)	31355	Weighted-mean FA (fractional anisotropy) in tract forceps minor (from dMRI data)
FA in the left inferior fronto-occipital fasciculus	IDP.1512	25500	0.0246088	AU	Association fibers	WM tract FA	Diffusion MRI	Diffusion-weighted imaging (dMRI Probtrack)	31355	Weighted-mean FA (fractional anisotropy) in tract left inferior fronto-occipital fasciculus (from dMRI data)
FA in the right inferior fronto-occipital fasciculus	IDP.1513	25501	0.0229686	AU	Association fibers	WM tract FA	Diffusion MRI	Diffusion-weighted imaging (dMRI Probtrack)	31355	Weighted-mean FA (fractional anisotropy) in tract right inferior fronto-occipital fasciculus (from dMRI data)
FA in the left inferior longitudinal fasciculus	IDP.1514	25502	0.0224424	AU	Association fibers	WM tract FA	Diffusion MRI	Diffusion-weighted imaging (dMRI Probtrack)	31355	Weighted-mean FA (fractional anisotropy) in tract left inferior longitudinal fasciculus (from dMRI data)
FA in the right inferior longitudinal fasciculus	IDP.1515	25503	0.0206314	AU	Association fibers	WM tract FA	Diffusion MRI	Diffusion-weighted imaging (dMRI Probtrack)	31355	Weighted-mean FA (fractional anisotropy) in tract right inferior longitudinal fasciculus (from dMRI data)
FA in the left superior thalamic radiation	IDP.1523	25511	0.0199329	AU	Projection fibers	WM tract FA	Diffusion MRI	Diffusion-weighted imaging (dMRI Probtrack)	31355	Weighted-mean FA (fractional anisotropy) in tract left superior thalamic radiation (from dMRI data)
FA in the right superior thalamic radiation	IDP.1524	25512	0.0203735	AU	Projection fibers	WM tract FA	Diffusion MRI	Diffusion-weighted imaging (dMRI Probtrack)	31355	Weighted-mean FA (fractional anisotropy) in tract right superior thalamic radiation (from dMRI data)
MO in the middle cerebellar peduncle	IDP.1527	25152	0.0517862	AU	Brainstem tracts	WM tract MO	Diffusion MRI	Diffusion-weighted imaging (dMRI TBSS)	31356	Mean MO (diffusion tensor mode) in middle cerebellar peduncle on FA (fractional anisotropy) skeleton (from dMRI data)
MO in the pontine crossing tract	IDP.1528	25153	0.177803	AU	Projection fibers	WM tract MO	Diffusion MRI	Diffusion-weighted imaging (dMRI TBSS)	31356	Mean MO (diffusion tensor mode) in pontine crossing tract on FA (fractional anisotropy) skeleton (from dMRI data)
MO in the genu of corpus callosum	IDP.1529	25154	0.0314805	AU	Commissural fibers	WM tract MO	Diffusion MRI	Diffusion-weighted imaging (dMRI TBSS)	31356	Mean MO (diffusion tensor mode) in genu of corpus callosum on FA (fractional anisotropy) skeleton (from dMRI data)
MO in the body of corpus callosum	IDP.1530	25155	0.0390851	AU	Commissural fibers	WM tract MO	Diffusion MRI	Diffusion-weighted imaging (dMRI TBSS)	31356	Mean MO (diffusion tensor mode) in body of corpus callosum on FA (fractional anisotropy) skeleton (from dMRI data)
MO in the fornix	IDP.1531	25156	0.030401	AU	Commissural fibers	WM tract MO	Diffusion MRI	Diffusion-weighted imaging (dMRI TBSS)	31356	Mean MO (diffusion tensor mode) in splenium of corpus callosum on FA (fractional anisotropy) skeleton (from dMRI data)
MO in the fornix	IDP.1532	25157	0.117274	AU	Association fibers	WM tract MO	Diffusion MRI	Diffusion-weighted imaging (dMRI TBSS)	31356	Mean MO (diffusion tensor mode) in fornix on FA (fractional anisotropy) skeleton (from dMRI data)
MO in the right corticospinal tract	IDP.1533	25158	0.145784	AU	Brainstem tracts	WM tract MO	Diffusion MRI	Diffusion-weighted imaging (dMRI TBSS)	31356	Mean MO (diffusion tensor mode) in corticospinal tract (right) on FA (fractional anisotropy) skeleton (from dMRI data)
MO in the left corticospinal tract	IDP.1534	25159	0.121733	AU	Brainstem tracts	WM tract MO	Diffusion MRI	Diffusion-weighted imaging (dMRI TBSS)	31356	Mean MO (diffusion tensor mode) in corticospinal tract (left) on FA (fractional anisotropy) skeleton (from dMRI data)
MO in the right medial lemniscus	IDP.1535	25160	0.0594194	AU	Brainstem tracts	WM tract MO	Diffusion MRI	Diffusion-weighted imaging (dMRI TBSS)	31356	Mean MO (diffusion tensor mode) in medial lemniscus (right) on FA (fractional anisotropy) skeleton (from dMRI data)
MO in the left medial lemniscus	IDP.1536	25161	0.0550615	AU	Brainstem tracts	WM tract MO	Diffusion MRI	Diffusion-weighted imaging (dMRI TBSS)	31356	Mean MO (diffusion tensor mode) in medial lemniscus (left) on FA (fractional anisotropy) skeleton (from dMRI data)
MO in the right inferior cerebellar peduncle	IDP.1537	25162	0.0958137	AU	Brainstem tracts	WM tract MO	Diffusion MRI	Diffusion-weighted imaging (dMRI TBSS)	31356	Mean MO (diffusion tensor mode) in inferior cerebellar peduncle (right) on FA (fractional anisotropy) skeleton (from dMRI data)
MO in the left inferior cerebellar peduncle	IDP.1538	25163	0.0942871	AU	Brainstem tracts	WM tract MO	Diffusion MRI	Diffusion-weighted imaging (dMRI TBSS)	31356	Mean MO (diffusion tensor mode) in inferior cerebellar peduncle (left) on FA (fractional anisotropy) skeleton (from dMRI data)
MO in the right superior cerebellar peduncle	IDP.1539	25164	0.0316196	AU	Brainstem tracts	WM tract MO	Diffusion MRI	Diffusion-weighted imaging (dMRI TBSS)	31356	Mean MO (diffusion tensor mode) in superior cerebellar peduncle (right) on FA (fractional anisotropy) skeleton (from dMRI data)
MO in the left superior cerebellar peduncle	IDP.1540	25165	0.0311326	AU	Brainstem tracts	WM tract MO	Diffusion MRI	Diffusion-weighted imaging (dMRI TBSS)	31356	Mean MO (diffusion tensor mode) in superior cerebellar peduncle (left) on FA (fractional anisotropy) skeleton (from dMRI data)
MO in the right cerebral peduncle	IDP.1541	25166	0.0331882	AU	Brainstem tracts	WM tract MO	Diffusion MRI	Diffusion-weighted imaging (dMRI TBSS)	31356	Mean MO (diffusion tensor mode) in cerebral peduncle (right) on FA (fractional anisotropy) skeleton (from dMRI data)
MO in the left cerebral peduncle	IDP.1542	25167	0.0362502	AU	Brainstem tracts	WM tract MO	Diffusion MRI	Diffusion-weighted imaging (dMRI TBSS)	31356	Mean MO (diffusion tensor mode) in cerebral peduncle (left) on FA (fractional anisotropy) skeleton (from dMRI data)
MO in the anterior limb of the right internal capsule	IDP.1543	25168	0.054311	AU	Projection fibers	WM tract MO	Diffusion MRI	Diffusion-weighted imaging (dMRI TBSS)	31356	Mean MO (diffusion tensor mode) in anterior limb of internal capsule (right) on FA (fractional anisotropy) skeleton (from dMRI data)
MO in the anterior limb of the left internal capsule	IDP.1544	25169	0.0516943	AU	Projection fibers	WM tract MO	Diffusion MRI	Diffusion-weighted imaging (dMRI TBSS)	31356	Mean MO (diffusion tensor mode) in anterior limb of internal capsule (left) on FA (fractional anisotropy) skeleton (from dMRI data)
MO in the posterior limb of the right internal capsule	IDP.1545	25170	0.0451958	AU	Projection fibers	WM tract MO	Diffusion MRI	Diffusion-weighted imaging (dMRI TBSS)	31356	Mean MO (diffusion tensor mode) in posterior limb of internal capsule (right) on FA (fractional anisotropy) skeleton (from dMRI data)
MO in the posterior limb of the left internal capsule	IDP.1546	25171	0.0522539	AU	Projection fibers	WM tract MO	Diffusion MRI	Diffusion-weighted imaging (dMRI TBSS)	31356	Mean MO (diffusion tensor mode) in posterior limb of internal capsule (left) on FA (fractional anisotropy) skeleton (from dMRI data)
MO in the retrolenticular part of the right internal capsule	IDP.1547	25172	0.0712137	AU	Projection fibers	WM tract MO	Diffusion MRI	Diffusion-weighted imaging (dMRI TBSS)	31356	Mean MO (diffusion tensor mode) in retrolenticular part of internal capsule (right) on FA (fractional anisotropy) skeleton (from dMRI data)
MO in the retrolenticular part of the left internal capsule	IDP.1548	25173	0.0568101	AU	Projection fibers	WM tract MO	Diffusion MRI	Diffusion-weighted imaging (dMRI TBSS)	31356	Mean MO (diffusion tensor mode) in retrolenticular part of internal capsule (left) on FA (fractional anisotropy) skeleton (from dMRI data)
MO in the right anterior corona radiata	IDP.1549	25174	0.0749893	AU	Projection fibers	WM tract MO	Diffusion MRI	Diffusion-weighted imaging (dMRI TBSS)	31356	Mean MO (diffusion tensor mode) in anterior corona radiata (right) on FA (fractional anisotropy) skeleton (from dMRI data)
MO in the left anterior corona radiata	IDP.1550	25175	0.0830904	AU	Projection fibers	WM tract MO	Diffusion MRI	Diffusion-weighted imaging (dMRI TBSS)	31356	Mean MO (diffusion tensor mode) in anterior corona radiata (left) on FA (fractional anisotropy) skeleton (from dMRI data)
MO in the right superior corona radiata	IDP.1551	25176	0.0933118	AU	Projection fibers	WM tract MO	Diffusion MRI	Diffusion-weighted imaging (dMRI TBSS)	31356	Mean MO (diffusion tensor mode) in superior corona radiata (right) on FA (fractional anisotropy) skeleton (from dMRI data)
MO in the left superior corona radiata	IDP.1552	25177	0.102919	AU	Projection fibers	WM tract MO	Diffusion MRI	Diffusion-weighted imaging (dMRI TBSS)	31356	Mean MO (diffusion tensor mode) in superior corona radiata (left) on FA (fractional anisotropy) skeleton (from dMRI data)
MO in the right posterior corona radiata	IDP.1553	25178	0.102459	AU	Projection fibers	WM tract MO	Diffusion MRI	Diffusion-weighted imaging (dMRI TBSS)	31356	Mean MO (diffusion tensor mode) in posterior corona radiata (right) on FA (fractional anisotropy) skeleton (from dMRI data)
MO in the left posterior corona radiata	IDP.1554	25179	0.086805	AU	Projection fibers	WM tract MO	Diffusion MRI	Diffusion-weighted imaging (dMRI TBSS)	31356	Mean MO (diffusion tensor mode) in posterior corona radiata (left) on FA (fractional anisotropy) skeleton (from dMRI data)
MO in the right posterior thalamic radiation	IDP.1555	25180	0.0708543	AU	Projection fibers	WM tract MO	Diffusion MRI	Diffusion-weighted imaging (dMRI TBSS)	31356	Mean MO (diffusion tensor mode) in posterior thalamic radiation (right) on FA (fractional anisotropy) skeleton (from dMRI data)
MO in the left posterior thalamic radiation	IDP.1556	25181	0.0682262	AU	Projection fibers	WM tract MO	Diffusion MRI	Diffusion-weighted imaging (dMRI TBSS)	31356	Mean MO (diffusion tensor mode) in posterior thalamic radiation (left) on FA (fractional anisotropy) skeleton (from dMRI data)
MO in the right sagittal stratum	IDP.1557	25182	0.0789384	AU	Association fibers	WM tract MO	Diffusion MRI	Diffusion-weighted imaging (dMRI TBSS)	31356	Mean MO (diffusion tensor mode) in sagittal stratum (right) on FA (fractional anisotropy) skeleton (from dMRI data)
MO in the left sagittal stratum	IDP.1558	25183	0.0750821	AU	Association fibers	WM tract MO	Diffusion MRI	Diffusion-weighted imaging (dMRI TBSS)	31356	Mean MO (diffusion tensor mode) in sagittal stratum (left) on FA (fractional anisotropy) skeleton (from dMRI data)
MO in the right external capsule	IDP.1559	25184	0.0688265	AU	Association fibers	WM tract MO	Diffusion MRI	Diffusion-weighted imaging (dMRI TBSS)	31356	Mean MO (diffusion tensor mode) in external capsule (right) on FA (fractional anisotropy) skeleton (from dMRI data)
MO in the left external capsule	IDP.1560	25185	0.0676242	AU	Association fibers	WM tract MO	Diffusion MRI	Diffusion-weighted imaging (dMRI TBSS)	31356	Mean MO (diffusion tensor mode) in external capsule (left) on FA (fractional anisotropy) skeleton (from dMRI data)
MO in the right cingulum cingulate gyrus part	IDP.1561	25186	0.0678487	AU	Limbic system fibers	WM tract MO	Diffusion MRI	Diffusion-weighted imaging (dMRI TBSS)	31356	Mean MO (diffusion tensor mode) in cingulum cingulate gyrus (right) on FA (fractional anisotropy) skeleton (from dMRI data)
MO in the left cingulum cingulate gyrus part	IDP.1562	25187	0.054045	AU	Limbic system fibers	WM tract MO	Diffusion MRI	Diffusion-weighted imaging (dMRI TBSS)	31356	Mean MO (diffusion tensor mode) in cingulum cingulate gyrus (left) on FA (fractional anisotropy) skeleton (from dMRI data)
MO in the right cingulum hippocampus	IDP.1563	25188	0.0851331	AU	Limbic system fibers	WM tract MO	Diffusion MRI	Diffusion-weighted imaging (dMRI TBSS)	31356	Mean MO (diffusion tensor mode) in cingulum hippocampus (right) on FA (fractional anisotropy) skeleton (from dMRI data)
MO in the left cingulum hippocampus	IDP.1564	25189	0.0952804	AU	Limbic system fibers	WM tract MO	Diffusion MRI	Diffusion-weighted imaging (dMRI TBSS)	31356	Mean MO (diffusion tensor mode) in cingulum hippocampus (left) on FA (fractional anisotropy) skeleton (from dMRI data)
MO in the right fornix and stria terminalis	IDP.1565	25190	0.0960608	AU	Association fibers	WM tract MO	Diffusion MRI	Diffusion-weighted imaging (dMRI TBSS)	31356	Mean MO (diffusion tensor mode) in fornix cres+stria terminalis (right) on FA (fractional anisotropy) skeleton (from dMRI data)
MO in the left fornix and stria terminalis	IDP.1566	25191	0.10536	AU	Association fibers	WM tract MO	Diffusion MRI	Diffusion-weighted imaging (dMRI TBSS)	31356	Mean MO (diffusion tensor mode) in fornix cres+stria terminalis (left) on FA (fractional anisotropy) skeleton (from dMRI data)
MO in the right superior longitudinal fasciculus	IDP.1567	25192	0.0832308	AU	Association fibers	WM tract MO	Diffusion MRI	Diffusion-weighted imaging (dMRI TBSS)	31356	Mean MO (diffusion tensor mode) in superior longitudinal fasciculus (right) on FA (fractional anisotropy) skeleton (from dMRI data)
MO in the left superior longitudinal fasciculus	IDP.1568	25193	0.0891055	AU	Association fibers	WM tract MO	Diffusion MRI	Diffusion-weighted imaging (dMRI TBSS)	31356	Mean MO (diffusion tensor mode) in superior longitudinal fasciculus (left) on FA (fractional anisotropy) skeleton (from dMRI data)
MO in the right superior fronto-occipital fasciculus	IDP.1569	25194	0.122299	AU	Association fibers	WM tract MO	Diffusion MRI	Diffusion-weighted imaging (dMRI TBSS)	31356	Mean MO (diffusion tensor mode) in superior fronto-occipital fasciculus (right) on FA (fractional anisotropy) skeleton (from dMRI data)
MO in the left superior fronto-occipital fasciculus	IDP.1570	25195	0.151449	AU	Association fibers	WM tract MO	Diffusion MRI	Diffusion-weighted imaging (dMRI TBSS)	31356	Mean MO (diffusion tensor mode) in superior fronto-occipital fasciculus (left) on FA (fractional anisotropy) skeleton (from dMRI data)
MO in the right uncinate fasciculus	IDP.1571	25196	0.0855945	AU	Association fibers	WM tract MO	Diffusion MRI	Diffusion-weighted imaging (dMRI TBSS)	31356	Mean MO (diffusion tensor mode) in uncinate fasciculus (right) on FA (fractional anisotropy) skeleton (from dMRI data)
MO in the left uncinate fasciculus	IDP.1572	25197	0.0941382	AU	Association fibers	WM tract MO	Diffusion MRI	Diffusion-weighted imaging (dMRI TBSS)	31356	Mean MO (diffusion tensor mode) in uncinate fasciculus (left) on FA (fractional anisotropy) skeleton (from dMRI data)
MO in the right tapetum	IDP.1573	25198	0.087988	AU	Commissural fibers	WM tract MO	Diffusion MRI	Diffusion-weighted imaging (dMRI TBSS)	31356	Mean MO (diffusion tensor mode) in tapetum (right) on FA (fractional anisotropy) skeleton (from dMRI data)
MO in the left tapetum	IDP.1574	25199	0.108281	AU	Commissural fibers	WM tract MO	Diffusion MRI	Diffusion-weighted imaging (dMRI TBSS)	31356	Mean MO (diffusion tensor mode) in tapetum (left) on FA (fractional anisotropy) skeleton (from dMRI data)
MO in the left acoustic radiation	IDP.1575	25542	0.0637041	AU	Projection fibers	WM tract MO	Diffusion MRI	Diffusion-weighted imaging (dMRI Probtrack)	31355	Weighted-mean MO (diffusion tensor mode) in tract left acoustic radiation (from dMRI data)
MO in the right acoustic radiation	IDP.1576	25543	0.062187	AU	Projection fibers	WM tract MO	Diffusion MRI	Diffusion-weighted imaging (dMRI Probtrack)	31355	Weighted-mean MO (diffusion tensor mode) in tract right acoustic radiation (from dMRI data)
MO in the left anterior thalamic radiation	IDP.1577	25544	0.0436576	AU	Projection fibers	WM tract MO	Diffusion MRI	Diffusion-weighted imaging (dMRI Probtrack)	31355	Weighted-mean MO (diffusion tensor mode) in tract left anterior thalamic radiation (from dMRI data)
MO in the right anterior thalamic radiation	IDP.1578	25545	0.0429489	AU	Projection fibers	WM tract MO	Diffusion MRI	Diffusion-weighted imaging (dMRI Probtrack)	31355	Weighted-mean MO (diffusion tensor mode) in tract right anterior thalamic radiation (from dMRI data)
MO in the forceps major	IDP.1585	25552	0.0368488	AU	Commissural fibers	WM tract MO	Diffusion MRI	Diffusion-weighted imaging (dMRI Probtrack)	31355	Weighted-mean MO (diffusion tensor mode) in tract forceps major (from dMRI data)
MO in the forceps minor	IDP.1586	25553	0.0390095	AU	Commissural fibers	WM tract MO	Diffusion MRI	Diffusion-weighted imaging (dMRI Probtrack)	31355	Weighted-mean MO (diffusion tensor mode) in tract forceps minor (from dMRI data)
MO in the left inferior fronto-occipital fasciculus	IDP.1587	25554	0.0382036	AU	Association fibers	WM tract MO	Diffusion MRI	Diffusion-weighted imaging (dMRI Probtrack)	31355	Weighted-mean MO (diffusion tensor mode) in tract left inferior fronto-occipital fasciculus (from dMRI data)
MO in the right inferior fronto-occipital fasciculus	IDP.1588	25555	0.0369464	AU	Association fibers	WM tract MO	Diffusion MRI	Diffusion-weighted imaging (dMRI Probtrack)	31355	Weighted-mean MO (diffusion tensor mode) in tract right inferior fronto-occipital fasciculus (from dMRI data)
MO in the left inferior longitudinal fasciculus	IDP.1589	25556	0.0363628	AU	Association fibers	WM tract MO	Diffusion MRI	Diffusion-weighted imaging (dMRI Probtrack)	31355	Weighted-mean MO (diffusion tensor mode) in tract left inferior longitudinal fasciculus (from dMRI data)
MO in the right inferior longitudinal fasciculus	IDP.1590	25557	0.0341128	AU	Association fibers	WM tract MO	Diffusion MRI	Diffusion-weighted imaging (dMRI Probtrack)	31355	Weighted-mean MO (diffusion tensor mode) in tract right inferior longitudinal fasciculus (from dMRI data)
MO in the left superior thalamic radiation	IDP.1598	25565	0.0597339	AU	Projection fibers	WM tract MO	Diffusion MRI	Diffusion-weighted imaging (dMRI Probtrack)	31355	Weighted-mean MO (diffusion tensor mode) in tract left superior thalamic radiation (from dMRI data)
MO in the right superior thalamic radiation	IDP.1599	25566	0.0597261	AU	Projection fibers	WM tract MO	Diffusion MRI	Diffusion-weighted imaging (dMRI Probtrack)	31355	Weighted-mean MO (diffusion tensor mode) in tract right superior thalamic radiation (from dMRI data)
MD in the middle cerebellar peduncle	IDP.1602	25104	3.21765e-05	AU	Brainstem tracts	WM tract MD	Diffusion MRI	Diffusion-weighted imaging (dMRI TBSS)	31356	Mean MD (mean diffusivity) in middle cerebellar peduncle on FA (fractional anisotropy) skeleton (from dMRI data)
MD in the pontine crossing tract	IDP.1603	25105	8.36204e-05	AU	Projection fibers	WM tract MD	Diffusion MRI	Diffusion-weighted imaging (dMRI TBSS)	31356	Mean MD (mean diffusivity) in pontine crossing tract on FA (fractional anisotropy) skeleton (from dMRI data)
MD in the genu of corpus callosum	IDP.1604	25106	4.86623e-05	AU	Commissural fibers	WM tract MD	Diffusion MRI	Diffusion-weighted imaging (dMRI TBSS)	31356	Mean MD (mean diffusivity) in genu of corpus callosum on FA (fractional anisotropy) skeleton (from dMRI data)
MD in the body of corpus callosum	IDP.1605	25107	4.08854e-05	AU	Commissural fibers	WM tract MD	Diffusion MRI	Diffusion-weighted imaging (dMRI TBSS)	31356	Mean MD (mean diffusivity) in body of corpus callosum on FA (fractional anisotropy) skeleton (from dMRI data)
MD in the fornix	IDP.1606	25108	3.37236e-05	AU	Commissural fibers	WM tract MD	Diffusion MRI	Diffusion-weighted imaging (dMRI TBSS)	31356	Mean MD (mean diffusivity) in splenium of corpus callosum on FA (fractional anisotropy) skeleton (from dMRI data)
MD in the fornix	IDP.1607	25109	0.000317773	AU	Association fibers	WM tract MD	Diffusion MRI	Diffusion-weighted imaging (dMRI TBSS)	31356	Mean MD (mean diffusivity) in fornix on FA (fractional anisotropy) skeleton (from dMRI data)
MD in the right corticospinal tract	IDP.1608	25110	7.88183e-05	AU	Brainstem tracts	WM tract MD	Diffusion MRI	Diffusion-weighted imaging (dMRI TBSS)	31356	Mean MD (mean diffusivity) in corticospinal tract (right) on FA (fractional anisotropy) skeleton (from dMRI data)
MD in the left corticospinal tract	IDP.1609	25111	7.10379e-05	AU	Brainstem tracts	WM tract MD	Diffusion MRI	Diffusion-weighted imaging (dMRI TBSS)	31356	Mean MD (mean diffusivity) in corticospinal tract (left) on FA (fractional anisotropy) skeleton (from dMRI data)
MD in the right medial lemniscus	IDP.1610	25112	4.93906e-05	AU	Brainstem tracts	WM tract MD	Diffusion MRI	Diffusion-weighted imaging (dMRI TBSS)	31356	Mean MD (mean diffusivity) in medial lemniscus (right) on FA (fractional anisotropy) skeleton (from dMRI data)
MD in the left medial lemniscus	IDP.1611	25113	5.23148e-05	AU	Brainstem tracts	WM tract MD	Diffusion MRI	Diffusion-weighted imaging (dMRI TBSS)	31356	Mean MD (mean diffusivity) in medial lemniscus (left) on FA (fractional anisotropy) skeleton (from dMRI data)
MD in the right inferior cerebellar peduncle	IDP.1612	25114	3.05692e-05	AU	Brainstem tracts	WM tract MD	Diffusion MRI	Diffusion-weighted imaging (dMRI TBSS)	31356	Mean MD (mean diffusivity) in inferior cerebellar peduncle (right) on FA (fractional anisotropy) skeleton (from dMRI data)
MD in the left inferior cerebellar peduncle	IDP.1613	25115	3.50876e-05	AU	Brainstem tracts	WM tract MD	Diffusion MRI	Diffusion-weighted imaging (dMRI TBSS)	31356	Mean MD (mean diffusivity) in inferior cerebellar peduncle (left) on FA (fractional anisotropy) skeleton (from dMRI data)
MD in the right superior cerebellar peduncle	IDP.1614	25116	3.95025e-05	AU	Brainstem tracts	WM tract MD	Diffusion MRI	Diffusion-weighted imaging (dMRI TBSS)	31356	Mean MD (mean diffusivity) in superior cerebellar peduncle (right) on FA (fractional anisotropy) skeleton (from dMRI data)
MD in the left superior cerebellar peduncle	IDP.1615	25117	3.89145e-05	AU	Brainstem tracts	WM tract MD	Diffusion MRI	Diffusion-weighted imaging (dMRI TBSS)	31356	Mean MD (mean diffusivity) in superior cerebellar peduncle (left) on FA (fractional anisotropy) skeleton (from dMRI data)
MD in the right cerebral peduncle	IDP.1616	25118	3.18717e-05	AU	Brainstem tracts	WM tract MD	Diffusion MRI	Diffusion-weighted imaging (dMRI TBSS)	31356	Mean MD (mean diffusivity) in cerebral peduncle (right) on FA (fractional anisotropy) skeleton (from dMRI data)
MD in the left cerebral peduncle	IDP.1617	25119	3.0716e-05	AU	Brainstem tracts	WM tract MD	Diffusion MRI	Diffusion-weighted imaging (dMRI TBSS)	31356	Mean MD (mean diffusivity) in cerebral peduncle (left) on FA (fractional anisotropy) skeleton (from dMRI data)
MD in the anterior limb of the right internal capsule	IDP.1618	25120	3.75925e-05	AU	Projection fibers	WM tract MD	Diffusion MRI	Diffusion-weighted imaging (dMRI TBSS)	31356	Mean MD (mean diffusivity) in anterior limb of internal capsule (right) on FA (fractional anisotropy) skeleton (from dMRI data)
MD in the anterior limb of the left internal capsule	IDP.1619	25121	3.7695e-05	AU	Projection fibers	WM tract MD	Diffusion MRI	Diffusion-weighted imaging (dMRI TBSS)	31356	Mean MD (mean diffusivity) in anterior limb of internal capsule (left) on FA (fractional anisotropy) skeleton (from dMRI data)
MD in the posterior limb of the right internal capsule	IDP.1620	25122	2.48285e-05	AU	Projection fibers	WM tract MD	Diffusion MRI	Diffusion-weighted imaging (dMRI TBSS)	31356	Mean MD (mean diffusivity) in posterior limb of internal capsule (right) on FA (fractional anisotropy) skeleton (from dMRI data)
MD in the posterior limb of the left internal capsule	IDP.1621	25123	2.41804e-05	AU	Projection fibers	WM tract MD	Diffusion MRI	Diffusion-weighted imaging (dMRI TBSS)	31356	Mean MD (mean diffusivity) in posterior limb of internal capsule (left) on FA (fractional anisotropy) skeleton (from dMRI data)
MD in the retrolenticular part of the right internal capsule	IDP.1622	25124	3.68142e-05	AU	Projection fibers	WM tract MD	Diffusion MRI	Diffusion-weighted imaging (dMRI TBSS)	31356	Mean MD (mean diffusivity) in retrolenticular part of internal capsule (right) on FA (fractional anisotropy) skeleton (from dMRI data)
MD in the retrolenticular part of the left internal capsule	IDP.1623	25125	3.33013e-05	AU	Projection fibers	WM tract MD	Diffusion MRI	Diffusion-weighted imaging (dMRI TBSS)	31356	Mean MD (mean diffusivity) in retrolenticular part of internal capsule (left) on FA (fractional anisotropy) skeleton (from dMRI data)
MD in the right anterior corona radiata	IDP.1624	25126	4.33203e-05	AU	Projection fibers	WM tract MD	Diffusion MRI	Diffusion-weighted imaging (dMRI TBSS)	31356	Mean MD (mean diffusivity) in anterior corona radiata (right) on FA (fractional anisotropy) skeleton (from dMRI data)
MD in the left anterior corona radiata	IDP.1625	25127	4.4848e-05	AU	Projection fibers	WM tract MD	Diffusion MRI	Diffusion-weighted imaging (dMRI TBSS)	31356	Mean MD (mean diffusivity) in anterior corona radiata (left) on FA (fractional anisotropy) skeleton (from dMRI data)
MD in the right superior corona radiata	IDP.1626	25128	3.64646e-05	AU	Projection fibers	WM tract MD	Diffusion MRI	Diffusion-weighted imaging (dMRI TBSS)	31356	Mean MD (mean diffusivity) in superior corona radiata (right) on FA (fractional anisotropy) skeleton (from dMRI data)
MD in the left superior corona radiata	IDP.1627	25129	3.71506e-05	AU	Projection fibers	WM tract MD	Diffusion MRI	Diffusion-weighted imaging (dMRI TBSS)	31356	Mean MD (mean diffusivity) in superior corona radiata (left) on FA (fractional anisotropy) skeleton (from dMRI data)
MD in the right posterior corona radiata	IDP.1628	25130	5.89103e-05	AU	Projection fibers	WM tract MD	Diffusion MRI	Diffusion-weighted imaging (dMRI TBSS)	31356	Mean MD (mean diffusivity) in posterior corona radiata (right) on FA (fractional anisotropy) skeleton (from dMRI data)
MD in the left posterior corona radiata	IDP.1629	25131	5.38876e-05	AU	Projection fibers	WM tract MD	Diffusion MRI	Diffusion-weighted imaging (dMRI TBSS)	31356	Mean MD (mean diffusivity) in posterior corona radiata (left) on FA (fractional anisotropy) skeleton (from dMRI data)
MD in the right posterior thalamic radiation	IDP.1630	25132	4.86736e-05	AU	Projection fibers	WM tract MD	Diffusion MRI	Diffusion-weighted imaging (dMRI TBSS)	31356	Mean MD (mean diffusivity) in posterior thalamic radiation (right) on FA (fractional anisotropy) skeleton (from dMRI data)
MD in the left posterior thalamic radiation	IDP.1631	25133	5.28637e-05	AU	Projection fibers	WM tract MD	Diffusion MRI	Diffusion-weighted imaging (dMRI TBSS)	31356	Mean MD (mean diffusivity) in posterior thalamic radiation (left) on FA (fractional anisotropy) skeleton (from dMRI data)
MD in the right sagittal stratum	IDP.1632	25134	4.2092e-05	AU	Association fibers	WM tract MD	Diffusion MRI	Diffusion-weighted imaging (dMRI TBSS)	31356	Mean MD (mean diffusivity) in sagittal stratum (right) on FA (fractional anisotropy) skeleton (from dMRI data)
MD in the left sagittal stratum	IDP.1633	25135	4.10807e-05	AU	Association fibers	WM tract MD	Diffusion MRI	Diffusion-weighted imaging (dMRI TBSS)	31356	Mean MD (mean diffusivity) in sagittal stratum (left) on FA (fractional anisotropy) skeleton (from dMRI data)
MD in the right external capsule	IDP.1634	25136	3.74299e-05	AU	Association fibers	WM tract MD	Diffusion MRI	Diffusion-weighted imaging (dMRI TBSS)	31356	Mean MD (mean diffusivity) in external capsule (right) on FA (fractional anisotropy) skeleton (from dMRI data)
MD in the left external capsule	IDP.1635	25137	3.83931e-05	AU	Association fibers	WM tract MD	Diffusion MRI	Diffusion-weighted imaging (dMRI TBSS)	31356	Mean MD (mean diffusivity) in external capsule (left) on FA (fractional anisotropy) skeleton (from dMRI data)
MD in the right cingulum cingulate gyrus part	IDP.1636	25138	2.92974e-05	AU	Limbic system fibers	WM tract MD	Diffusion MRI	Diffusion-weighted imaging (dMRI TBSS)	31356	Mean MD (mean diffusivity) in cingulum cingulate gyrus (right) on FA (fractional anisotropy) skeleton (from dMRI data)
MD in the left cingulum cingulate gyrus part	IDP.1637	25139	2.95466e-05	AU	Limbic system fibers	WM tract MD	Diffusion MRI	Diffusion-weighted imaging (dMRI TBSS)	31356	Mean MD (mean diffusivity) in cingulum cingulate gyrus (left) on FA (fractional anisotropy) skeleton (from dMRI data)
MD in the right cingulum hippocampus	IDP.1638	25140	3.55636e-05	AU	Limbic system fibers	WM tract MD	Diffusion MRI	Diffusion-weighted imaging (dMRI TBSS)	31356	Mean MD (mean diffusivity) in cingulum hippocampus (right) on FA (fractional anisotropy) skeleton (from dMRI data)
MD in the left cingulum hippocampus	IDP.1639	25141	3.69011e-05	AU	Limbic system fibers	WM tract MD	Diffusion MRI	Diffusion-weighted imaging (dMRI TBSS)	31356	Mean MD (mean diffusivity) in cingulum hippocampus (left) on FA (fractional anisotropy) skeleton (from dMRI data)
MD in the right fornix and stria terminalis	IDP.1640	25142	6.19574e-05	AU	Association fibers	WM tract MD	Diffusion MRI	Diffusion-weighted imaging (dMRI TBSS)	31356	Mean MD (mean diffusivity) in fornix cres+stria terminalis (right) on FA (fractional anisotropy) skeleton (from dMRI data)
MD in the left fornix and stria terminalis	IDP.1641	25143	6.12844e-05	AU	Association fibers	WM tract MD	Diffusion MRI	Diffusion-weighted imaging (dMRI TBSS)	31356	Mean MD (mean diffusivity) in fornix cres+stria terminalis (left) on FA (fractional anisotropy) skeleton (from dMRI data)
MD in the right superior longitudinal fasciculus	IDP.1642	25144	3.46836e-05	AU	Association fibers	WM tract MD	Diffusion MRI	Diffusion-weighted imaging (dMRI TBSS)	31356	Mean MD (mean diffusivity) in superior longitudinal fasciculus (right) on FA (fractional anisotropy) skeleton (from dMRI data)
MD in the left superior longitudinal fasciculus	IDP.1643	25145	3.27119e-05	AU	Association fibers	WM tract MD	Diffusion MRI	Diffusion-weighted imaging (dMRI TBSS)	31356	Mean MD (mean diffusivity) in superior longitudinal fasciculus (left) on FA (fractional anisotropy) skeleton (from dMRI data)
MD in the right superior fronto-occipital fasciculus	IDP.1644	25146	7.42923e-05	AU	Association fibers	WM tract MD	Diffusion MRI	Diffusion-weighted imaging (dMRI TBSS)	31356	Mean MD (mean diffusivity) in superior fronto-occipital fasciculus (right) on FA (fractional anisotropy) skeleton (from dMRI data)
MD in the left superior fronto-occipital fasciculus	IDP.1645	25147	9.388e-05	AU	Association fibers	WM tract MD	Diffusion MRI	Diffusion-weighted imaging (dMRI TBSS)	31356	Mean MD (mean diffusivity) in superior fronto-occipital fasciculus (left) on FA (fractional anisotropy) skeleton (from dMRI data)
MD in the right uncinate fasciculus	IDP.1646	25148	3.35131e-05	AU	Association fibers	WM tract MD	Diffusion MRI	Diffusion-weighted imaging (dMRI TBSS)	31356	Mean MD (mean diffusivity) in uncinate fasciculus (right) on FA (fractional anisotropy) skeleton (from dMRI data)
MD in the left uncinate fasciculus	IDP.1647	25149	3.93207e-05	AU	Association fibers	WM tract MD	Diffusion MRI	Diffusion-weighted imaging (dMRI TBSS)	31356	Mean MD (mean diffusivity) in uncinate fasciculus (left) on FA (fractional anisotropy) skeleton (from dMRI data)
MD in the right tapetum	IDP.1648	25150	0.00014127	AU	Commissural fibers	WM tract MD	Diffusion MRI	Diffusion-weighted imaging (dMRI TBSS)	31356	Mean MD (mean diffusivity) in tapetum (right) on FA (fractional anisotropy) skeleton (from dMRI data)
MD in the left tapetum	IDP.1649	25151	0.000138643	AU	Commissural fibers	WM tract MD	Diffusion MRI	Diffusion-weighted imaging (dMRI TBSS)	31356	Mean MD (mean diffusivity) in tapetum (left) on FA (fractional anisotropy) skeleton (from dMRI data)
MD in the left acoustic radiation	IDP.1794	25515	4.12204e-05	AU	Projection fibers	WM tract MD	Diffusion MRI	Diffusion-weighted imaging (dMRI Probtrack)	31355	Weighted-mean MD (mean diffusivity) in tract left acoustic radiation (from dMRI data)
MD in the right acoustic radiation	IDP.1795	25516	4.15231e-05	AU	Projection fibers	WM tract MD	Diffusion MRI	Diffusion-weighted imaging (dMRI Probtrack)	31355	Weighted-mean MD (mean diffusivity) in tract right acoustic radiation (from dMRI data)
MD in the left anterior thalamic radiation	IDP.1796	25517	4.23334e-05	AU	Projection fibers	WM tract MD	Diffusion MRI	Diffusion-weighted imaging (dMRI Probtrack)	31355	Weighted-mean MD (mean diffusivity) in tract left anterior thalamic radiation (from dMRI data)
MD in the right anterior thalamic radiation	IDP.1797	25518	4.20739e-05	AU	Projection fibers	WM tract MD	Diffusion MRI	Diffusion-weighted imaging (dMRI Probtrack)	31355	Weighted-mean MD (mean diffusivity) in tract right anterior thalamic radiation (from dMRI data)
MD in the forceps major	IDP.1804	25525	5.65014e-05	AU	Commissural fibers	WM tract MD	Diffusion MRI	Diffusion-weighted imaging (dMRI Probtrack)	31355	Weighted-mean MD (mean diffusivity) in tract forceps major (from dMRI data)
MD in the forceps minor	IDP.1805	25526	3.73316e-05	AU	Commissural fibers	WM tract MD	Diffusion MRI	Diffusion-weighted imaging (dMRI Probtrack)	31355	Weighted-mean MD (mean diffusivity) in tract forceps minor (from dMRI data)
MD in the left inferior fronto-occipital fasciculus	IDP.1806	25527	3.84564e-05	AU	Association fibers	WM tract MD	Diffusion MRI	Diffusion-weighted imaging (dMRI Probtrack)	31355	Weighted-mean MD (mean diffusivity) in tract left inferior fronto-occipital fasciculus (from dMRI data)
MD in the right inferior fronto-occipital fasciculus	IDP.1807	25528	3.82706e-05	AU	Association fibers	WM tract MD	Diffusion MRI	Diffusion-weighted imaging (dMRI Probtrack)	31355	Weighted-mean MD (mean diffusivity) in tract right inferior fronto-occipital fasciculus (from dMRI data)
MD in the left inferior longitudinal fasciculus	IDP.1808	25529	3.75228e-05	AU	Association fibers	WM tract MD	Diffusion MRI	Diffusion-weighted imaging (dMRI Probtrack)	31355	Weighted-mean MD (mean diffusivity) in tract left inferior longitudinal fasciculus (from dMRI data)
MD in the right inferior longitudinal fasciculus	IDP.1809	25530	3.627e-05	AU	Association fibers	WM tract MD	Diffusion MRI	Diffusion-weighted imaging (dMRI Probtrack)	31355	Weighted-mean MD (mean diffusivity) in tract right inferior longitudinal fasciculus (from dMRI data)
MD in the left superior thalamic radiation	IDP.1817	25538	3.15607e-05	AU	Projection fibers	WM tract MD	Diffusion MRI	Diffusion-weighted imaging (dMRI Probtrack)	31355	Weighted-mean MD (mean diffusivity) in tract left superior thalamic radiation (from dMRI data)
MD in the right superior thalamic radiation	IDP.1818	25539	3.27079e-05	AU	Projection fibers	WM tract MD	Diffusion MRI	Diffusion-weighted imaging (dMRI Probtrack)	31355	Weighted-mean MD (mean diffusivity) in tract right superior thalamic radiation (from dMRI data)
ICVF in the middle cerebellar peduncle	IDP.1902	25344	0.0276791	AU	Brainstem tracts	WM tract ICVF	Diffusion MRI	Diffusion-weighted imaging (dMRI TBSS)	31355	Mean ICVF (intra-cellular volume fraction) in middle cerebellar peduncle on FA (fractional anisotropy) skeleton (from dMRI data)
ICVF in the pontine crossing tract	IDP.1903	25345	0.0439678	AU	Projection fibers	WM tract ICVF	Diffusion MRI	Diffusion-weighted imaging (dMRI TBSS)	31355	Mean ICVF (intra-cellular volume fraction) in pontine crossing tract on FA (fractional anisotropy) skeleton (from dMRI data)
ICVF in the genu of corpus callosum	IDP.1904	25346	0.0417639	AU	Commissural fibers	WM tract ICVF	Diffusion MRI	Diffusion-weighted imaging (dMRI TBSS)	31355	Mean ICVF (intra-cellular volume fraction) in genu of corpus callosum on FA (fractional anisotropy) skeleton (from dMRI data)
ICVF in the body of corpus callosum	IDP.1905	25347	0.0341148	AU	Commissural fibers	WM tract ICVF	Diffusion MRI	Diffusion-weighted imaging (dMRI TBSS)	31355	Mean ICVF (intra-cellular volume fraction) in body of corpus callosum on FA (fractional anisotropy) skeleton (from dMRI data)
ICVF in the fornix	IDP.1906	25348	0.0330555	AU	Commissural fibers	WM tract ICVF	Diffusion MRI	Diffusion-weighted imaging (dMRI TBSS)	31355	Mean ICVF (intra-cellular volume fraction) in splenium of corpus callosum on FA (fractional anisotropy) skeleton (from dMRI data)
ICVF in the fornix	IDP.1907	25349	0.069523	AU	Association fibers	WM tract ICVF	Diffusion MRI	Diffusion-weighted imaging (dMRI TBSS)	31355	Mean ICVF (intra-cellular volume fraction) in fornix on FA (fractional anisotropy) skeleton (from dMRI data)
ICVF in the right corticospinal tract	IDP.1908	25350	0.0461299	AU	Brainstem tracts	WM tract ICVF	Diffusion MRI	Diffusion-weighted imaging (dMRI TBSS)	31355	Mean ICVF (intra-cellular volume fraction) in corticospinal tract (right) on FA (fractional anisotropy) skeleton (from dMRI data)
ICVF in the left corticospinal tract	IDP.1909	25351	0.044565	AU	Brainstem tracts	WM tract ICVF	Diffusion MRI	Diffusion-weighted imaging (dMRI TBSS)	31355	Mean ICVF (intra-cellular volume fraction) in corticospinal tract (left) on FA (fractional anisotropy) skeleton (from dMRI data)
ICVF in the right medial lemniscus	IDP.1910	25352	0.0309835	AU	Brainstem tracts	WM tract ICVF	Diffusion MRI	Diffusion-weighted imaging (dMRI TBSS)	31355	Mean ICVF (intra-cellular volume fraction) in medial lemniscus (right) on FA (fractional anisotropy) skeleton (from dMRI data)
ICVF in the left medial lemniscus	IDP.1911	25353	0.0323183	AU	Brainstem tracts	WM tract ICVF	Diffusion MRI	Diffusion-weighted imaging (dMRI TBSS)	31355	Mean ICVF (intra-cellular volume fraction) in medial lemniscus (left) on FA (fractional anisotropy) skeleton (from dMRI data)
ICVF in the right inferior cerebellar peduncle	IDP.1912	25354	0.029897	AU	Brainstem tracts	WM tract ICVF	Diffusion MRI	Diffusion-weighted imaging (dMRI TBSS)	31355	Mean ICVF (intra-cellular volume fraction) in inferior cerebellar peduncle (right) on FA (fractional anisotropy) skeleton (from dMRI data)
ICVF in the left inferior cerebellar peduncle	IDP.1913	25355	0.0301725	AU	Brainstem tracts	WM tract ICVF	Diffusion MRI	Diffusion-weighted imaging (dMRI TBSS)	31355	Mean ICVF (intra-cellular volume fraction) in inferior cerebellar peduncle (left) on FA (fractional anisotropy) skeleton (from dMRI data)
ICVF in the right superior cerebellar peduncle	IDP.1914	25356	0.025006	AU	Brainstem tracts	WM tract ICVF	Diffusion MRI	Diffusion-weighted imaging (dMRI TBSS)	31355	Mean ICVF (intra-cellular volume fraction) in superior cerebellar peduncle (right) on FA (fractional anisotropy) skeleton (from dMRI data)
ICVF in the left superior cerebellar peduncle	IDP.1915	25357	0.0245602	AU	Brainstem tracts	WM tract ICVF	Diffusion MRI	Diffusion-weighted imaging (dMRI TBSS)	31355	Mean ICVF (intra-cellular volume fraction) in superior cerebellar peduncle (left) on FA (fractional anisotropy) skeleton (from dMRI data)
ICVF in the right cerebral peduncle	IDP.1916	25358	0.0314374	AU	Brainstem tracts	WM tract ICVF	Diffusion MRI	Diffusion-weighted imaging (dMRI TBSS)	31355	Mean ICVF (intra-cellular volume fraction) in cerebral peduncle (right) on FA (fractional anisotropy) skeleton (from dMRI data)
ICVF in the left cerebral peduncle	IDP.1917	25359	0.0307766	AU	Brainstem tracts	WM tract ICVF	Diffusion MRI	Diffusion-weighted imaging (dMRI TBSS)	31355	Mean ICVF (intra-cellular volume fraction) in cerebral peduncle (left) on FA (fractional anisotropy) skeleton (from dMRI data)
ICVF in the anterior limb of the right internal capsule	IDP.1918	25360	0.0330356	AU	Projection fibers	WM tract ICVF	Diffusion MRI	Diffusion-weighted imaging (dMRI TBSS)	31355	Mean ICVF (intra-cellular volume fraction) in anterior limb of internal capsule (right) on FA (fractional anisotropy) skeleton (from dMRI data)
ICVF in the anterior limb of the left internal capsule	IDP.1919	25361	0.0332511	AU	Projection fibers	WM tract ICVF	Diffusion MRI	Diffusion-weighted imaging (dMRI TBSS)	31355	Mean ICVF (intra-cellular volume fraction) in anterior limb of internal capsule (left) on FA (fractional anisotropy) skeleton (from dMRI data)
ICVF in the posterior limb of the right internal capsule	IDP.1920	25362	0.0261977	AU	Projection fibers	WM tract ICVF	Diffusion MRI	Diffusion-weighted imaging (dMRI TBSS)	31355	Mean ICVF (intra-cellular volume fraction) in posterior limb of internal capsule (right) on FA (fractional anisotropy) skeleton (from dMRI data)
ICVF in the posterior limb of the left internal capsule	IDP.1921	25363	0.0259201	AU	Projection fibers	WM tract ICVF	Diffusion MRI	Diffusion-weighted imaging (dMRI TBSS)	31355	Mean ICVF (intra-cellular volume fraction) in posterior limb of internal capsule (left) on FA (fractional anisotropy) skeleton (from dMRI data)
ICVF in the retrolenticular part of the right internal capsule	IDP.1922	25364	0.0364355	AU	Projection fibers	WM tract ICVF	Diffusion MRI	Diffusion-weighted imaging (dMRI TBSS)	31355	Mean ICVF (intra-cellular volume fraction) in retrolenticular part of internal capsule (right) on FA (fractional anisotropy) skeleton (from dMRI data)
ICVF in the retrolenticular part of the left internal capsule	IDP.1923	25365	0.0347545	AU	Projection fibers	WM tract ICVF	Diffusion MRI	Diffusion-weighted imaging (dMRI TBSS)	31355	Mean ICVF (intra-cellular volume fraction) in retrolenticular part of internal capsule (left) on FA (fractional anisotropy) skeleton (from dMRI data)
ICVF in the right anterior corona radiata	IDP.1924	25366	0.0464526	AU	Projection fibers	WM tract ICVF	Diffusion MRI	Diffusion-weighted imaging (dMRI TBSS)	31355	Mean ICVF (intra-cellular volume fraction) in anterior corona radiata (right) on FA (fractional anisotropy) skeleton (from dMRI data)
ICVF in the left anterior corona radiata	IDP.1925	25367	0.0467189	AU	Projection fibers	WM tract ICVF	Diffusion MRI	Diffusion-weighted imaging (dMRI TBSS)	31355	Mean ICVF (intra-cellular volume fraction) in anterior corona radiata (left) on FA (fractional anisotropy) skeleton (from dMRI data)
ICVF in the right superior corona radiata	IDP.1926	25368	0.0386832	AU	Projection fibers	WM tract ICVF	Diffusion MRI	Diffusion-weighted imaging (dMRI TBSS)	31355	Mean ICVF (intra-cellular volume fraction) in superior corona radiata (right) on FA (fractional anisotropy) skeleton (from dMRI data)
ICVF in the left superior corona radiata	IDP.1927	25369	0.0397079	AU	Projection fibers	WM tract ICVF	Diffusion MRI	Diffusion-weighted imaging (dMRI TBSS)	31355	Mean ICVF (intra-cellular volume fraction) in superior corona radiata (left) on FA (fractional anisotropy) skeleton (from dMRI data)
ICVF in the right posterior corona radiata	IDP.1928	25370	0.0493182	AU	Projection fibers	WM tract ICVF	Diffusion MRI	Diffusion-weighted imaging (dMRI TBSS)	31355	Mean ICVF (intra-cellular volume fraction) in posterior corona radiata (right) on FA (fractional anisotropy) skeleton (from dMRI data)
ICVF in the left posterior corona radiata	IDP.1929	25371	0.0472361	AU	Projection fibers	WM tract ICVF	Diffusion MRI	Diffusion-weighted imaging (dMRI TBSS)	31355	Mean ICVF (intra-cellular volume fraction) in posterior corona radiata (left) on FA (fractional anisotropy) skeleton (from dMRI data)
ICVF in the right posterior thalamic radiation	IDP.1930	25372	0.0447557	AU	Projection fibers	WM tract ICVF	Diffusion MRI	Diffusion-weighted imaging (dMRI TBSS)	31355	Mean ICVF (intra-cellular volume fraction) in posterior thalamic radiation (right) on FA (fractional anisotropy) skeleton (from dMRI data)
ICVF in the left posterior thalamic radiation	IDP.1931	25373	0.0446325	AU	Projection fibers	WM tract ICVF	Diffusion MRI	Diffusion-weighted imaging (dMRI TBSS)	31355	Mean ICVF (intra-cellular volume fraction) in posterior thalamic radiation (left) on FA (fractional anisotropy) skeleton (from dMRI data)
ICVF in the right sagittal stratum	IDP.1932	25374	0.0440014	AU	Association fibers	WM tract ICVF	Diffusion MRI	Diffusion-weighted imaging (dMRI TBSS)	31355	Mean ICVF (intra-cellular volume fraction) in sagittal stratum (right) on FA (fractional anisotropy) skeleton (from dMRI data)
ICVF in the left sagittal stratum	IDP.1933	25375	0.0415856	AU	Association fibers	WM tract ICVF	Diffusion MRI	Diffusion-weighted imaging (dMRI TBSS)	31355	Mean ICVF (intra-cellular volume fraction) in sagittal stratum (left) on FA (fractional anisotropy) skeleton (from dMRI data)
ICVF in the right external capsule	IDP.1934	25376	0.0298306	AU	Association fibers	WM tract ICVF	Diffusion MRI	Diffusion-weighted imaging (dMRI TBSS)	31355	Mean ICVF (intra-cellular volume fraction) in external capsule (right) on FA (fractional anisotropy) skeleton (from dMRI data)
ICVF in the left external capsule	IDP.1935	25377	0.0301488	AU	Association fibers	WM tract ICVF	Diffusion MRI	Diffusion-weighted imaging (dMRI TBSS)	31355	Mean ICVF (intra-cellular volume fraction) in external capsule (left) on FA (fractional anisotropy) skeleton (from dMRI data)
ICVF in the right cingulum cingulate gyrus part	IDP.1936	25378	0.0377715	AU	Limbic system fibers	WM tract ICVF	Diffusion MRI	Diffusion-weighted imaging (dMRI TBSS)	31355	Mean ICVF (intra-cellular volume fraction) in cingulum cingulate gyrus (right) on FA (fractional anisotropy) skeleton (from dMRI data)
ICVF in the left cingulum cingulate gyrus part	IDP.1937	25379	0.0385873	AU	Limbic system fibers	WM tract ICVF	Diffusion MRI	Diffusion-weighted imaging (dMRI TBSS)	31355	Mean ICVF (intra-cellular volume fraction) in cingulum cingulate gyrus (left) on FA (fractional anisotropy) skeleton (from dMRI data)
ICVF in the right cingulum hippocampus	IDP.1938	25380	0.0341404	AU	Limbic system fibers	WM tract ICVF	Diffusion MRI	Diffusion-weighted imaging (dMRI TBSS)	31355	Mean ICVF (intra-cellular volume fraction) in cingulum hippocampus (right) on FA (fractional anisotropy) skeleton (from dMRI data)
ICVF in the left cingulum hippocampus	IDP.1939	25381	0.0329933	AU	Limbic system fibers	WM tract ICVF	Diffusion MRI	Diffusion-weighted imaging (dMRI TBSS)	31355	Mean ICVF (intra-cellular volume fraction) in cingulum hippocampus (left) on FA (fractional anisotropy) skeleton (from dMRI data)
ICVF in the right fornix and stria terminalis	IDP.1940	25382	0.0354276	AU	Association fibers	WM tract ICVF	Diffusion MRI	Diffusion-weighted imaging (dMRI TBSS)	31355	Mean ICVF (intra-cellular volume fraction) in fornix cres+stria terminalis (right) on FA (fractional anisotropy) skeleton (from dMRI data)
ICVF in the left fornix and stria terminalis	IDP.1941	25383	0.0346477	AU	Association fibers	WM tract ICVF	Diffusion MRI	Diffusion-weighted imaging (dMRI TBSS)	31355	Mean ICVF (intra-cellular volume fraction) in fornix cres+stria terminalis (left) on FA (fractional anisotropy) skeleton (from dMRI data)
ICVF in the right superior longitudinal fasciculus	IDP.1942	25384	0.0399561	AU	Association fibers	WM tract ICVF	Diffusion MRI	Diffusion-weighted imaging (dMRI TBSS)	31355	Mean ICVF (intra-cellular volume fraction) in superior longitudinal fasciculus (right) on FA (fractional anisotropy) skeleton (from dMRI data)
ICVF in the left superior longitudinal fasciculus	IDP.1943	25385	0.0398906	AU	Association fibers	WM tract ICVF	Diffusion MRI	Diffusion-weighted imaging (dMRI TBSS)	31355	Mean ICVF (intra-cellular volume fraction) in superior longitudinal fasciculus (left) on FA (fractional anisotropy) skeleton (from dMRI data)
ICVF in the right superior fronto-occipital fasciculus	IDP.1944	25386	0.0585019	AU	Association fibers	WM tract ICVF	Diffusion MRI	Diffusion-weighted imaging (dMRI TBSS)	31355	Mean ICVF (intra-cellular volume fraction) in superior fronto-occipital fasciculus (right) on FA (fractional anisotropy) skeleton (from dMRI data)
ICVF in the left superior fronto-occipital fasciculus	IDP.1945	25387	0.0653807	AU	Association fibers	WM tract ICVF	Diffusion MRI	Diffusion-weighted imaging (dMRI TBSS)	31355	Mean ICVF (intra-cellular volume fraction) in superior fronto-occipital fasciculus (left) on FA (fractional anisotropy) skeleton (from dMRI data)
ICVF in the right uncinate fasciculus	IDP.1946	25388	0.0323308	AU	Association fibers	WM tract ICVF	Diffusion MRI	Diffusion-weighted imaging (dMRI TBSS)	31355	Mean ICVF (intra-cellular volume fraction) in uncinate fasciculus (right) on FA (fractional anisotropy) skeleton (from dMRI data)
ICVF in the left uncinate fasciculus	IDP.1947	25389	0.0328901	AU	Association fibers	WM tract ICVF	Diffusion MRI	Diffusion-weighted imaging (dMRI TBSS)	31355	Mean ICVF (intra-cellular volume fraction) in uncinate fasciculus (left) on FA (fractional anisotropy) skeleton (from dMRI data)
ICVF in the right tapetum	IDP.1948	25390	0.0682152	AU	Commissural fibers	WM tract ICVF	Diffusion MRI	Diffusion-weighted imaging (dMRI TBSS)	31355	Mean ICVF (intra-cellular volume fraction) in tapetum (right) on FA (fractional anisotropy) skeleton (from dMRI data)
ICVF in the left tapetum	IDP.1949	25391	0.0664134	AU	Commissural fibers	WM tract ICVF	Diffusion MRI	Diffusion-weighted imaging (dMRI TBSS)	31355	Mean ICVF (intra-cellular volume fraction) in tapetum (left) on FA (fractional anisotropy) skeleton (from dMRI data)
ICVF in the left acoustic radiation	IDP.1950	25650	0.0317751	AU	Projection fibers	WM tract ICVF	Diffusion MRI	Diffusion-weighted imaging (dMRI Probtrack)	31354	Weighted-mean ICVF (intra-cellular volume fraction) in tract left acoustic radiation (from dMRI data)
ICVF in the right acoustic radiation	IDP.1951	25651	0.0317002	AU	Projection fibers	WM tract ICVF	Diffusion MRI	Diffusion-weighted imaging (dMRI Probtrack)	31354	Weighted-mean ICVF (intra-cellular volume fraction) in tract right acoustic radiation (from dMRI data)
ICVF in the left anterior thalamic radiation	IDP.1952	25652	0.0341556	AU	Projection fibers	WM tract ICVF	Diffusion MRI	Diffusion-weighted imaging (dMRI Probtrack)	31354	Weighted-mean ICVF (intra-cellular volume fraction) in tract left anterior thalamic radiation (from dMRI data)
ICVF in the right anterior thalamic radiation	IDP.1953	25653	0.0337732	AU	Projection fibers	WM tract ICVF	Diffusion MRI	Diffusion-weighted imaging (dMRI Probtrack)	31354	Weighted-mean ICVF (intra-cellular volume fraction) in tract right anterior thalamic radiation (from dMRI data)
ICVF in the forceps major	IDP.1960	25660	0.0350295	AU	Commissural fibers	WM tract ICVF	Diffusion MRI	Diffusion-weighted imaging (dMRI Probtrack)	31354	Weighted-mean ICVF (intra-cellular volume fraction) in tract forceps major (from dMRI data)
ICVF in the forceps minor	IDP.1961	25661	0.0384438	AU	Commissural fibers	WM tract ICVF	Diffusion MRI	Diffusion-weighted imaging (dMRI Probtrack)	31354	Weighted-mean ICVF (intra-cellular volume fraction) in tract forceps minor (from dMRI data)
ICVF in the left inferior fronto-occipital fasciculus	IDP.1962	25662	0.0364355	AU	Association fibers	WM tract ICVF	Diffusion MRI	Diffusion-weighted imaging (dMRI Probtrack)	31354	Weighted-mean ICVF (intra-cellular volume fraction) in tract left inferior fronto-occipital fasciculus (from dMRI data)
ICVF in the right inferior fronto-occipital fasciculus	IDP.1963	25663	0.0364976	AU	Association fibers	WM tract ICVF	Diffusion MRI	Diffusion-weighted imaging (dMRI Probtrack)	31354	Weighted-mean ICVF (intra-cellular volume fraction) in tract right inferior fronto-occipital fasciculus (from dMRI data)
ICVF in the left inferior longitudinal fasciculus	IDP.1964	25664	0.0343867	AU	Association fibers	WM tract ICVF	Diffusion MRI	Diffusion-weighted imaging (dMRI Probtrack)	31354	Weighted-mean ICVF (intra-cellular volume fraction) in tract left inferior longitudinal fasciculus (from dMRI data)
ICVF in the right inferior longitudinal fasciculus	IDP.1965	25665	0.0341222	AU	Association fibers	WM tract ICVF	Diffusion MRI	Diffusion-weighted imaging (dMRI Probtrack)	31354	Weighted-mean ICVF (intra-cellular volume fraction) in tract right inferior longitudinal fasciculus (from dMRI data)
ICVF in the left superior thalamic radiation	IDP.1973	25673	0.0302319	AU	Projection fibers	WM tract ICVF	Diffusion MRI	Diffusion-weighted imaging (dMRI Probtrack)	31354	Weighted-mean ICVF (intra-cellular volume fraction) in tract left superior thalamic radiation (from dMRI data)
ICVF in the right superior thalamic radiation	IDP.1974	25674	0.0305007	AU	Projection fibers	WM tract ICVF	Diffusion MRI	Diffusion-weighted imaging (dMRI Probtrack)	31354	Weighted-mean ICVF (intra-cellular volume fraction) in tract right superior thalamic radiation (from dMRI data)
OD in the middle cerebellar peduncle	IDP.1977	25392	0.0161189	AU	Brainstem tracts	WM tract OD	Diffusion MRI	Diffusion-weighted imaging (dMRI TBSS)	31355	Mean OD (orientation dispersion index) in middle cerebellar peduncle on FA (fractional anisotropy) skeleton (from dMRI data)
OD in the pontine crossing tract	IDP.1978	25393	0.03535	AU	Projection fibers	WM tract OD	Diffusion MRI	Diffusion-weighted imaging (dMRI TBSS)	31355	Mean OD (orientation dispersion index) in pontine crossing tract on FA (fractional anisotropy) skeleton (from dMRI data)
OD in the genu of corpus callosum	IDP.1979	25394	0.010741	AU	Commissural fibers	WM tract OD	Diffusion MRI	Diffusion-weighted imaging (dMRI TBSS)	31355	Mean OD (orientation dispersion index) in genu of corpus callosum on FA (fractional anisotropy) skeleton (from dMRI data)
OD in the body of corpus callosum	IDP.1980	25395	0.0119428	AU	Commissural fibers	WM tract OD	Diffusion MRI	Diffusion-weighted imaging (dMRI TBSS)	31355	Mean OD (orientation dispersion index) in body of corpus callosum on FA (fractional anisotropy) skeleton (from dMRI data)
OD in the fornix	IDP.1981	25396	0.00982144	AU	Commissural fibers	WM tract OD	Diffusion MRI	Diffusion-weighted imaging (dMRI TBSS)	31355	Mean OD (orientation dispersion index) in splenium of corpus callosum on FA (fractional anisotropy) skeleton (from dMRI data)
OD in the fornix	IDP.1982	25397	0.151134	AU	Association fibers	WM tract OD	Diffusion MRI	Diffusion-weighted imaging (dMRI TBSS)	31355	Mean OD (orientation dispersion index) in fornix on FA (fractional anisotropy) skeleton (from dMRI data)
OD in the right corticospinal tract	IDP.1983	25398	0.0321666	AU	Brainstem tracts	WM tract OD	Diffusion MRI	Diffusion-weighted imaging (dMRI TBSS)	31355	Mean OD (orientation dispersion index) in corticospinal tract (right) on FA (fractional anisotropy) skeleton (from dMRI data)
OD in the left corticospinal tract	IDP.1984	25399	0.0282567	AU	Brainstem tracts	WM tract OD	Diffusion MRI	Diffusion-weighted imaging (dMRI TBSS)	31355	Mean OD (orientation dispersion index) in corticospinal tract (left) on FA (fractional anisotropy) skeleton (from dMRI data)
OD in the right medial lemniscus	IDP.1985	25400	0.0162036	AU	Brainstem tracts	WM tract OD	Diffusion MRI	Diffusion-weighted imaging (dMRI TBSS)	31355	Mean OD (orientation dispersion index) in medial lemniscus (right) on FA (fractional anisotropy) skeleton (from dMRI data)
OD in the left medial lemniscus	IDP.1986	25401	0.0164511	AU	Brainstem tracts	WM tract OD	Diffusion MRI	Diffusion-weighted imaging (dMRI TBSS)	31355	Mean OD (orientation dispersion index) in medial lemniscus (left) on FA (fractional anisotropy) skeleton (from dMRI data)
OD in the right inferior cerebellar peduncle	IDP.1987	25402	0.0240613	AU	Brainstem tracts	WM tract OD	Diffusion MRI	Diffusion-weighted imaging (dMRI TBSS)	31355	Mean OD (orientation dispersion index) in inferior cerebellar peduncle (right) on FA (fractional anisotropy) skeleton (from dMRI data)
OD in the left inferior cerebellar peduncle	IDP.1988	25403	0.0236512	AU	Brainstem tracts	WM tract OD	Diffusion MRI	Diffusion-weighted imaging (dMRI TBSS)	31355	Mean OD (orientation dispersion index) in inferior cerebellar peduncle (left) on FA (fractional anisotropy) skeleton (from dMRI data)
OD in the right superior cerebellar peduncle	IDP.1989	25404	0.0102924	AU	Brainstem tracts	WM tract OD	Diffusion MRI	Diffusion-weighted imaging (dMRI TBSS)	31355	Mean OD (orientation dispersion index) in superior cerebellar peduncle (right) on FA (fractional anisotropy) skeleton (from dMRI data)
OD in the left superior cerebellar peduncle	IDP.1990	25405	0.0104326	AU	Brainstem tracts	WM tract OD	Diffusion MRI	Diffusion-weighted imaging (dMRI TBSS)	31355	Mean OD (orientation dispersion index) in superior cerebellar peduncle (left) on FA (fractional anisotropy) skeleton (from dMRI data)
OD in the right cerebral peduncle	IDP.1991	25406	0.0140023	AU	Brainstem tracts	WM tract OD	Diffusion MRI	Diffusion-weighted imaging (dMRI TBSS)	31355	Mean OD (orientation dispersion index) in cerebral peduncle (right) on FA (fractional anisotropy) skeleton (from dMRI data)
OD in the left cerebral peduncle	IDP.1992	25407	0.0136997	AU	Brainstem tracts	WM tract OD	Diffusion MRI	Diffusion-weighted imaging (dMRI TBSS)	31355	Mean OD (orientation dispersion index) in cerebral peduncle (left) on FA (fractional anisotropy) skeleton (from dMRI data)
OD in the anterior limb of the right internal capsule	IDP.1993	25408	0.013304	AU	Projection fibers	WM tract OD	Diffusion MRI	Diffusion-weighted imaging (dMRI TBSS)	31355	Mean OD (orientation dispersion index) in anterior limb of internal capsule (right) on FA (fractional anisotropy) skeleton (from dMRI data)
OD in the anterior limb of the left internal capsule	IDP.1994	25409	0.0140626	AU	Projection fibers	WM tract OD	Diffusion MRI	Diffusion-weighted imaging (dMRI TBSS)	31355	Mean OD (orientation dispersion index) in anterior limb of internal capsule (left) on FA (fractional anisotropy) skeleton (from dMRI data)
OD in the posterior limb of the right internal capsule	IDP.1995	25410	0.013657	AU	Projection fibers	WM tract OD	Diffusion MRI	Diffusion-weighted imaging (dMRI TBSS)	31355	Mean OD (orientation dispersion index) in posterior limb of internal capsule (right) on FA (fractional anisotropy) skeleton (from dMRI data)
OD in the posterior limb of the left internal capsule	IDP.1996	25411	0.0140885	AU	Projection fibers	WM tract OD	Diffusion MRI	Diffusion-weighted imaging (dMRI TBSS)	31355	Mean OD (orientation dispersion index) in posterior limb of internal capsule (left) on FA (fractional anisotropy) skeleton (from dMRI data)
OD in the retrolenticular part of the right internal capsule	IDP.1997	25412	0.0155262	AU	Projection fibers	WM tract OD	Diffusion MRI	Diffusion-weighted imaging (dMRI TBSS)	31355	Mean OD (orientation dispersion index) in retrolenticular part of internal capsule (right) on FA (fractional anisotropy) skeleton (from dMRI data)
OD in the retrolenticular part of the left internal capsule	IDP.1998	25413	0.0134105	AU	Projection fibers	WM tract OD	Diffusion MRI	Diffusion-weighted imaging (dMRI TBSS)	31355	Mean OD (orientation dispersion index) in retrolenticular part of internal capsule (left) on FA (fractional anisotropy) skeleton (from dMRI data)
OD in the right anterior corona radiata	IDP.1999	25414	0.0185881	AU	Projection fibers	WM tract OD	Diffusion MRI	Diffusion-weighted imaging (dMRI TBSS)	31355	Mean OD (orientation dispersion index) in anterior corona radiata (right) on FA (fractional anisotropy) skeleton (from dMRI data)
OD in the left anterior corona radiata	IDP.2000	25415	0.0186014	AU	Projection fibers	WM tract OD	Diffusion MRI	Diffusion-weighted imaging (dMRI TBSS)	31355	Mean OD (orientation dispersion index) in anterior corona radiata (left) on FA (fractional anisotropy) skeleton (from dMRI data)
OD in the right superior corona radiata	IDP.2001	25416	0.0200135	AU	Projection fibers	WM tract OD	Diffusion MRI	Diffusion-weighted imaging (dMRI TBSS)	31355	Mean OD (orientation dispersion index) in superior corona radiata (right) on FA (fractional anisotropy) skeleton (from dMRI data)
OD in the left superior corona radiata	IDP.2002	25417	0.0201742	AU	Projection fibers	WM tract OD	Diffusion MRI	Diffusion-weighted imaging (dMRI TBSS)	31355	Mean OD (orientation dispersion index) in superior corona radiata (left) on FA (fractional anisotropy) skeleton (from dMRI data)
OD in the right posterior corona radiata	IDP.2003	25418	0.0186992	AU	Projection fibers	WM tract OD	Diffusion MRI	Diffusion-weighted imaging (dMRI TBSS)	31355	Mean OD (orientation dispersion index) in posterior corona radiata (right) on FA (fractional anisotropy) skeleton (from dMRI data)
OD in the left posterior corona radiata	IDP.2004	25419	0.0171795	AU	Projection fibers	WM tract OD	Diffusion MRI	Diffusion-weighted imaging (dMRI TBSS)	31355	Mean OD (orientation dispersion index) in posterior corona radiata (left) on FA (fractional anisotropy) skeleton (from dMRI data)
OD in the right posterior thalamic radiation	IDP.2005	25420	0.0124706	AU	Projection fibers	WM tract OD	Diffusion MRI	Diffusion-weighted imaging (dMRI TBSS)	31355	Mean OD (orientation dispersion index) in posterior thalamic radiation (right) on FA (fractional anisotropy) skeleton (from dMRI data)
OD in the left posterior thalamic radiation	IDP.2006	25421	0.0117823	AU	Projection fibers	WM tract OD	Diffusion MRI	Diffusion-weighted imaging (dMRI TBSS)	31355	Mean OD (orientation dispersion index) in posterior thalamic radiation (left) on FA (fractional anisotropy) skeleton (from dMRI data)
OD in the right sagittal stratum	IDP.2007	25422	0.0141978	AU	Association fibers	WM tract OD	Diffusion MRI	Diffusion-weighted imaging (dMRI TBSS)	31355	Mean OD (orientation dispersion index) in sagittal stratum (right) on FA (fractional anisotropy) skeleton (from dMRI data)
OD in the left sagittal stratum	IDP.2008	25423	0.0153563	AU	Association fibers	WM tract OD	Diffusion MRI	Diffusion-weighted imaging (dMRI TBSS)	31355	Mean OD (orientation dispersion index) in sagittal stratum (left) on FA (fractional anisotropy) skeleton (from dMRI data)
OD in the right external capsule	IDP.2009	25424	0.0153389	AU	Association fibers	WM tract OD	Diffusion MRI	Diffusion-weighted imaging (dMRI TBSS)	31355	Mean OD (orientation dispersion index) in external capsule (right) on FA (fractional anisotropy) skeleton (from dMRI data)
OD in the left external capsule	IDP.2010	25425	0.0167714	AU	Association fibers	WM tract OD	Diffusion MRI	Diffusion-weighted imaging (dMRI TBSS)	31355	Mean OD (orientation dispersion index) in external capsule (left) on FA (fractional anisotropy) skeleton (from dMRI data)
OD in the right cingulum cingulate gyrus part	IDP.2011	25426	0.0172006	AU	Limbic system fibers	WM tract OD	Diffusion MRI	Diffusion-weighted imaging (dMRI TBSS)	31355	Mean OD (orientation dispersion index) in cingulum cingulate gyrus (right) on FA (fractional anisotropy) skeleton (from dMRI data)
OD in the left cingulum cingulate gyrus part	IDP.2012	25427	0.0142467	AU	Limbic system fibers	WM tract OD	Diffusion MRI	Diffusion-weighted imaging (dMRI TBSS)	31355	Mean OD (orientation dispersion index) in cingulum cingulate gyrus (left) on FA (fractional anisotropy) skeleton (from dMRI data)
OD in the right cingulum hippocampus	IDP.2013	25428	0.0284595	AU	Limbic system fibers	WM tract OD	Diffusion MRI	Diffusion-weighted imaging (dMRI TBSS)	31355	Mean OD (orientation dispersion index) in cingulum hippocampus (right) on FA (fractional anisotropy) skeleton (from dMRI data)
OD in the left cingulum hippocampus	IDP.2014	25429	0.0291241	AU	Limbic system fibers	WM tract OD	Diffusion MRI	Diffusion-weighted imaging (dMRI TBSS)	31355	Mean OD (orientation dispersion index) in cingulum hippocampus (left) on FA (fractional anisotropy) skeleton (from dMRI data)
OD in the right fornix and stria terminalis	IDP.2015	25430	0.0233282	AU	Association fibers	WM tract OD	Diffusion MRI	Diffusion-weighted imaging (dMRI TBSS)	31355	Mean OD (orientation dispersion index) in fornix cres+stria terminalis (right) on FA (fractional anisotropy) skeleton (from dMRI data)
OD in the left fornix and stria terminalis	IDP.2016	25431	0.0247022	AU	Association fibers	WM tract OD	Diffusion MRI	Diffusion-weighted imaging (dMRI TBSS)	31355	Mean OD (orientation dispersion index) in fornix cres+stria terminalis (left) on FA (fractional anisotropy) skeleton (from dMRI data)
OD in the right superior longitudinal fasciculus	IDP.2017	25432	0.0159634	AU	Association fibers	WM tract OD	Diffusion MRI	Diffusion-weighted imaging (dMRI TBSS)	31355	Mean OD (orientation dispersion index) in superior longitudinal fasciculus (right) on FA (fractional anisotropy) skeleton (from dMRI data)
OD in the left superior longitudinal fasciculus	IDP.2018	25433	0.0166859	AU	Association fibers	WM tract OD	Diffusion MRI	Diffusion-weighted imaging (dMRI TBSS)	31355	Mean OD (orientation dispersion index) in superior longitudinal fasciculus (left) on FA (fractional anisotropy) skeleton (from dMRI data)
OD in the right superior fronto-occipital fasciculus	IDP.2019	25434	0.0308711	AU	Association fibers	WM tract OD	Diffusion MRI	Diffusion-weighted imaging (dMRI TBSS)	31355	Mean OD (orientation dispersion index) in superior fronto-occipital fasciculus (right) on FA (fractional anisotropy) skeleton (from dMRI data)
OD in the left superior fronto-occipital fasciculus	IDP.2020	25435	0.0300379	AU	Association fibers	WM tract OD	Diffusion MRI	Diffusion-weighted imaging (dMRI TBSS)	31355	Mean OD (orientation dispersion index) in superior fronto-occipital fasciculus (left) on FA (fractional anisotropy) skeleton (from dMRI data)
OD in the right uncinate fasciculus	IDP.2021	25436	0.0232941	AU	Association fibers	WM tract OD	Diffusion MRI	Diffusion-weighted imaging (dMRI TBSS)	31355	Mean OD (orientation dispersion index) in uncinate fasciculus (right) on FA (fractional anisotropy) skeleton (from dMRI data)
OD in the left uncinate fasciculus	IDP.2022	25437	0.0238948	AU	Association fibers	WM tract OD	Diffusion MRI	Diffusion-weighted imaging (dMRI TBSS)	31355	Mean OD (orientation dispersion index) in uncinate fasciculus (left) on FA (fractional anisotropy) skeleton (from dMRI data)
OD in the right tapetum	IDP.2023	25438	0.0205068	AU	Commissural fibers	WM tract OD	Diffusion MRI	Diffusion-weighted imaging (dMRI TBSS)	31355	Mean OD (orientation dispersion index) in tapetum (right) on FA (fractional anisotropy) skeleton (from dMRI data)
OD in the left tapetum	IDP.2024	25439	0.0237907	AU	Commissural fibers	WM tract OD	Diffusion MRI	Diffusion-weighted imaging (dMRI TBSS)	31355	Mean OD (orientation dispersion index) in tapetum (left) on FA (fractional anisotropy) skeleton (from dMRI data)
OD in the left acoustic radiation	IDP.2025	25677	0.0177584	AU	Projection fibers	WM tract OD	Diffusion MRI	Diffusion-weighted imaging (dMRI Probtrack)	31354	Weighted-mean OD (orientation dispersion index) in tract left acoustic radiation (from dMRI data)
OD in the right acoustic radiation	IDP.2026	25678	0.0168966	AU	Projection fibers	WM tract OD	Diffusion MRI	Diffusion-weighted imaging (dMRI Probtrack)	31354	Weighted-mean OD (orientation dispersion index) in tract right acoustic radiation (from dMRI data)
OD in the left anterior thalamic radiation	IDP.2027	25679	0.0123288	AU	Projection fibers	WM tract OD	Diffusion MRI	Diffusion-weighted imaging (dMRI Probtrack)	31354	Weighted-mean OD (orientation dispersion index) in tract left anterior thalamic radiation (from dMRI data)
OD in the right anterior thalamic radiation	IDP.2028	25680	0.0132185	AU	Projection fibers	WM tract OD	Diffusion MRI	Diffusion-weighted imaging (dMRI Probtrack)	31354	Weighted-mean OD (orientation dispersion index) in tract right anterior thalamic radiation (from dMRI data)
OD in the forceps major	IDP.2035	25687	0.0110989	AU	Commissural fibers	WM tract OD	Diffusion MRI	Diffusion-weighted imaging (dMRI Probtrack)	31354	Weighted-mean OD (orientation dispersion index) in tract forceps major (from dMRI data)
OD in the forceps minor	IDP.2036	25688	0.0108224	AU	Commissural fibers	WM tract OD	Diffusion MRI	Diffusion-weighted imaging (dMRI Probtrack)	31354	Weighted-mean OD (orientation dispersion index) in tract forceps minor (from dMRI data)
OD in the left inferior fronto-occipital fasciculus	IDP.2037	25689	0.0112794	AU	Association fibers	WM tract OD	Diffusion MRI	Diffusion-weighted imaging (dMRI Probtrack)	31354	Weighted-mean OD (orientation dispersion index) in tract left inferior fronto-occipital fasciculus (from dMRI data)
OD in the right inferior fronto-occipital fasciculus	IDP.2038	25690	0.0109184	AU	Association fibers	WM tract OD	Diffusion MRI	Diffusion-weighted imaging (dMRI Probtrack)	31354	Weighted-mean OD (orientation dispersion index) in tract right inferior fronto-occipital fasciculus (from dMRI data)
OD in the left inferior longitudinal fasciculus	IDP.2039	25691	0.00955199	AU	Association fibers	WM tract OD	Diffusion MRI	Diffusion-weighted imaging (dMRI Probtrack)	31354	Weighted-mean OD (orientation dispersion index) in tract left inferior longitudinal fasciculus (from dMRI data)
OD in the right inferior longitudinal fasciculus	IDP.2040	25692	0.0091478	AU	Association fibers	WM tract OD	Diffusion MRI	Diffusion-weighted imaging (dMRI Probtrack)	31354	Weighted-mean OD (orientation dispersion index) in tract right inferior longitudinal fasciculus (from dMRI data)
OD in the left superior thalamic radiation	IDP.2048	25700	0.016652	AU	Projection fibers	WM tract OD	Diffusion MRI	Diffusion-weighted imaging (dMRI Probtrack)	31354	Weighted-mean OD (orientation dispersion index) in tract left superior thalamic radiation (from dMRI data)
OD in the right superior thalamic radiation	IDP.2049	25701	0.017093	AU	Projection fibers	WM tract OD	Diffusion MRI	Diffusion-weighted imaging (dMRI Probtrack)	31354	Weighted-mean OD (orientation dispersion index) in tract right superior thalamic radiation (from dMRI data)
ISOVF in the middle cerebellar peduncle	IDP.2052	25440	0.0189133	AU	Brainstem tracts	WM tract ISOVF	Diffusion MRI	Diffusion-weighted imaging (dMRI TBSS)	31355	Mean ISOVF (isotropic or free water volume fraction) in middle cerebellar peduncle on FA (fractional anisotropy) skeleton (from dMRI data)
ISOVF in the pontine crossing tract	IDP.2053	25441	0.0609194	AU	Projection fibers	WM tract ISOVF	Diffusion MRI	Diffusion-weighted imaging (dMRI TBSS)	31355	Mean ISOVF (isotropic or free water volume fraction) in pontine crossing tract on FA (fractional anisotropy) skeleton (from dMRI data)
ISOVF in the genu of corpus callosum	IDP.2054	25442	0.0248175	AU	Commissural fibers	WM tract ISOVF	Diffusion MRI	Diffusion-weighted imaging (dMRI TBSS)	31355	Mean ISOVF (isotropic or free water volume fraction) in genu of corpus callosum on FA (fractional anisotropy) skeleton (from dMRI data)
ISOVF in the body of corpus callosum	IDP.2055	25443	0.0211102	AU	Commissural fibers	WM tract ISOVF	Diffusion MRI	Diffusion-weighted imaging (dMRI TBSS)	31355	Mean ISOVF (isotropic or free water volume fraction) in body of corpus callosum on FA (fractional anisotropy) skeleton (from dMRI data)
ISOVF in the fornix	IDP.2056	25444	0.0164025	AU	Commissural fibers	WM tract ISOVF	Diffusion MRI	Diffusion-weighted imaging (dMRI TBSS)	31355	Mean ISOVF (isotropic or free water volume fraction) in splenium of corpus callosum on FA (fractional anisotropy) skeleton (from dMRI data)
ISOVF in the fornix	IDP.2057	25445	0.139631	AU	Association fibers	WM tract ISOVF	Diffusion MRI	Diffusion-weighted imaging (dMRI TBSS)	31355	Mean ISOVF (isotropic or free water volume fraction) in fornix on FA (fractional anisotropy) skeleton (from dMRI data)
ISOVF in the right corticospinal tract	IDP.2058	25446	0.0542329	AU	Brainstem tracts	WM tract ISOVF	Diffusion MRI	Diffusion-weighted imaging (dMRI TBSS)	31355	Mean ISOVF (isotropic or free water volume fraction) in corticospinal tract (right) on FA (fractional anisotropy) skeleton (from dMRI data)
ISOVF in the left corticospinal tract	IDP.2059	25447	0.0490069	AU	Brainstem tracts	WM tract ISOVF	Diffusion MRI	Diffusion-weighted imaging (dMRI TBSS)	31355	Mean ISOVF (isotropic or free water volume fraction) in corticospinal tract (left) on FA (fractional anisotropy) skeleton (from dMRI data)
ISOVF in the right medial lemniscus	IDP.2060	25448	0.0319744	AU	Brainstem tracts	WM tract ISOVF	Diffusion MRI	Diffusion-weighted imaging (dMRI TBSS)	31355	Mean ISOVF (isotropic or free water volume fraction) in medial lemniscus (right) on FA (fractional anisotropy) skeleton (from dMRI data)
ISOVF in the left medial lemniscus	IDP.2061	25449	0.0354937	AU	Brainstem tracts	WM tract ISOVF	Diffusion MRI	Diffusion-weighted imaging (dMRI TBSS)	31355	Mean ISOVF (isotropic or free water volume fraction) in medial lemniscus (left) on FA (fractional anisotropy) skeleton (from dMRI data)
ISOVF in the right inferior cerebellar peduncle	IDP.2062	25450	0.0197846	AU	Brainstem tracts	WM tract ISOVF	Diffusion MRI	Diffusion-weighted imaging (dMRI TBSS)	31355	Mean ISOVF (isotropic or free water volume fraction) in inferior cerebellar peduncle (right) on FA (fractional anisotropy) skeleton (from dMRI data)
ISOVF in the left inferior cerebellar peduncle	IDP.2063	25451	0.0230478	AU	Brainstem tracts	WM tract ISOVF	Diffusion MRI	Diffusion-weighted imaging (dMRI TBSS)	31355	Mean ISOVF (isotropic or free water volume fraction) in inferior cerebellar peduncle (left) on FA (fractional anisotropy) skeleton (from dMRI data)
ISOVF in the right superior cerebellar peduncle	IDP.2064	25452	0.0238711	AU	Brainstem tracts	WM tract ISOVF	Diffusion MRI	Diffusion-weighted imaging (dMRI TBSS)	31355	Mean ISOVF (isotropic or free water volume fraction) in superior cerebellar peduncle (right) on FA (fractional anisotropy) skeleton (from dMRI data)
ISOVF in the left superior cerebellar peduncle	IDP.2065	25453	0.022955	AU	Brainstem tracts	WM tract ISOVF	Diffusion MRI	Diffusion-weighted imaging (dMRI TBSS)	31355	Mean ISOVF (isotropic or free water volume fraction) in superior cerebellar peduncle (left) on FA (fractional anisotropy) skeleton (from dMRI data)
ISOVF in the right cerebral peduncle	IDP.2066	25454	0.0207382	AU	Brainstem tracts	WM tract ISOVF	Diffusion MRI	Diffusion-weighted imaging (dMRI TBSS)	31355	Mean ISOVF (isotropic or free water volume fraction) in cerebral peduncle (right) on FA (fractional anisotropy) skeleton (from dMRI data)
ISOVF in the left cerebral peduncle	IDP.2067	25455	0.0194569	AU	Brainstem tracts	WM tract ISOVF	Diffusion MRI	Diffusion-weighted imaging (dMRI TBSS)	31355	Mean ISOVF (isotropic or free water volume fraction) in cerebral peduncle (left) on FA (fractional anisotropy) skeleton (from dMRI data)
ISOVF in the anterior limb of the right internal capsule	IDP.2068	25456	0.0223615	AU	Projection fibers	WM tract ISOVF	Diffusion MRI	Diffusion-weighted imaging (dMRI TBSS)	31355	Mean ISOVF (isotropic or free water volume fraction) in anterior limb of internal capsule (right) on FA (fractional anisotropy) skeleton (from dMRI da
ISOVF in the anterior limb of the left internal capsule	IDP.2069	25457	0.0206807	AU	Projection fibers	WM tract ISOVF	Diffusion MRI	Diffusion-weighted imaging (dMRI TBSS)	31355	Mean ISOVF (isotropic or free water volume fraction) in anterior limb of internal capsule (left) on FA (fractional anisotropy) skeleton (from dMRI dat
ISOVF in the posterior limb of the right internal capsule	IDP.2070	25458	0.0183834	AU	Projection fibers	WM tract ISOVF	Diffusion MRI	Diffusion-weighted imaging (dMRI TBSS)	31355	Mean ISOVF (isotropic or free water volume fraction) in posterior limb of internal capsule (right) on FA (fractional anisotropy) skeleton (from dMRI d
ISOVF in the posterior limb of the left internal capsule	IDP.2071	25459	0.0160583	AU	Projection fibers	WM tract ISOVF	Diffusion MRI	Diffusion-weighted imaging (dMRI TBSS)	31355	Mean ISOVF (isotropic or free water volume fraction) in posterior limb of internal capsule (left) on FA (fractional anisotropy) skeleton (from dMRI da
ISOVF in the retrolenticular part of the right internal capsule	IDP.2072	25460	0.0206873	AU	Projection fibers	WM tract ISOVF	Diffusion MRI	Diffusion-weighted imaging (dMRI TBSS)	31355	Mean ISOVF (isotropic or free water volume fraction) in retrolenticular part of internal capsule (right) on FA (fractional anisotropy) skeleton (from
ISOVF in the retrolenticular part of the left internal capsule	IDP.2073	25461	0.0181508	AU	Projection fibers	WM tract ISOVF	Diffusion MRI	Diffusion-weighted imaging (dMRI TBSS)	31355	Mean ISOVF (isotropic or free water volume fraction) in retrolenticular part of internal capsule (left) on FA (fractional anisotropy) skeleton (from d
ISOVF in the right anterior corona radiata	IDP.2074	25462	0.0148969	AU	Projection fibers	WM tract ISOVF	Diffusion MRI	Diffusion-weighted imaging (dMRI TBSS)	31355	Mean ISOVF (isotropic or free water volume fraction) in anterior corona radiata (right) on FA (fractional anisotropy) skeleton (from dMRI data)
ISOVF in the left anterior corona radiata	IDP.2075	25463	0.0155165	AU	Projection fibers	WM tract ISOVF	Diffusion MRI	Diffusion-weighted imaging (dMRI TBSS)	31355	Mean ISOVF (isotropic or free water volume fraction) in anterior corona radiata (left) on FA (fractional anisotropy) skeleton (from dMRI data)
ISOVF in the right superior corona radiata	IDP.2076	25464	0.0164256	AU	Projection fibers	WM tract ISOVF	Diffusion MRI	Diffusion-weighted imaging (dMRI TBSS)	31355	Mean ISOVF (isotropic or free water volume fraction) in superior corona radiata (right) on FA (fractional anisotropy) skeleton (from dMRI data)
ISOVF in the left superior corona radiata	IDP.2077	25465	0.0156901	AU	Projection fibers	WM tract ISOVF	Diffusion MRI	Diffusion-weighted imaging (dMRI TBSS)	31355	Mean ISOVF (isotropic or free water volume fraction) in superior corona radiata (left) on FA (fractional anisotropy) skeleton (from dMRI data)
ISOVF in the right posterior corona radiata	IDP.2078	25466	0.0216582	AU	Projection fibers	WM tract ISOVF	Diffusion MRI	Diffusion-weighted imaging (dMRI TBSS)	31355	Mean ISOVF (isotropic or free water volume fraction) in posterior corona radiata (right) on FA (fractional anisotropy) skeleton (from dMRI data)
ISOVF in the left posterior corona radiata	IDP.2079	25467	0.0190915	AU	Projection fibers	WM tract ISOVF	Diffusion MRI	Diffusion-weighted imaging (dMRI TBSS)	31355	Mean ISOVF (isotropic or free water volume fraction) in posterior corona radiata (left) on FA (fractional anisotropy) skeleton (from dMRI data)
ISOVF in the right posterior thalamic radiation	IDP.2080	25468	0.0186153	AU	Projection fibers	WM tract ISOVF	Diffusion MRI	Diffusion-weighted imaging (dMRI TBSS)	31355	Mean ISOVF (isotropic or free water volume fraction) in posterior thalamic radiation (right) on FA (fractional anisotropy) skeleton (from dMRI data)
ISOVF in the left posterior thalamic radiation	IDP.2081	25469	0.0188217	AU	Projection fibers	WM tract ISOVF	Diffusion MRI	Diffusion-weighted imaging (dMRI TBSS)	31355	Mean ISOVF (isotropic or free water volume fraction) in posterior thalamic radiation (left) on FA (fractional anisotropy) skeleton (from dMRI data)
ISOVF in the right sagittal stratum	IDP.2082	25470	0.0175027	AU	Association fibers	WM tract ISOVF	Diffusion MRI	Diffusion-weighted imaging (dMRI TBSS)	31355	Mean ISOVF (isotropic or free water volume fraction) in sagittal stratum (right) on FA (fractional anisotropy) skeleton (from dMRI data)
ISOVF in the left sagittal stratum	IDP.2083	25471	0.0164399	AU	Association fibers	WM tract ISOVF	Diffusion MRI	Diffusion-weighted imaging (dMRI TBSS)	31355	Mean ISOVF (isotropic or free water volume fraction) in sagittal stratum (left) on FA (fractional anisotropy) skeleton (from dMRI data)
ISOVF in the right external capsule	IDP.2084	25472	0.0155378	AU	Association fibers	WM tract ISOVF	Diffusion MRI	Diffusion-weighted imaging (dMRI TBSS)	31355	Mean ISOVF (isotropic or free water volume fraction) in external capsule (right) on FA (fractional anisotropy) skeleton (from dMRI data)
ISOVF in the left external capsule	IDP.2085	25473	0.0144419	AU	Association fibers	WM tract ISOVF	Diffusion MRI	Diffusion-weighted imaging (dMRI TBSS)	31355	Mean ISOVF (isotropic or free water volume fraction) in external capsule (left) on FA (fractional anisotropy) skeleton (from dMRI data)
ISOVF in the right cingulum cingulate gyrus part	IDP.2086	25474	0.0176301	AU	Limbic system fibers	WM tract ISOVF	Diffusion MRI	Diffusion-weighted imaging (dMRI TBSS)	31355	Mean ISOVF (isotropic or free water volume fraction) in cingulum cingulate gyrus (right) on FA (fractional anisotropy) skeleton (from dMRI data)
ISOVF in the left cingulum cingulate gyrus part	IDP.2087	25475	0.0186269	AU	Limbic system fibers	WM tract ISOVF	Diffusion MRI	Diffusion-weighted imaging (dMRI TBSS)	31355	Mean ISOVF (isotropic or free water volume fraction) in cingulum cingulate gyrus (left) on FA (fractional anisotropy) skeleton (from dMRI data)
ISOVF in the right cingulum hippocampus	IDP.2088	25476	0.01487	AU	Limbic system fibers	WM tract ISOVF	Diffusion MRI	Diffusion-weighted imaging (dMRI TBSS)	31355	Mean ISOVF (isotropic or free water volume fraction) in cingulum hippocampus (right) on FA (fractional anisotropy) skeleton (from dMRI data)
ISOVF in the left cingulum hippocampus	IDP.2089	25477	0.0162945	AU	Limbic system fibers	WM tract ISOVF	Diffusion MRI	Diffusion-weighted imaging (dMRI TBSS)	31355	Mean ISOVF (isotropic or free water volume fraction) in cingulum hippocampus (left) on FA (fractional anisotropy) skeleton (from dMRI data)
ISOVF in the right fornix and stria terminalis	IDP.2090	25478	0.0430178	AU	Association fibers	WM tract ISOVF	Diffusion MRI	Diffusion-weighted imaging (dMRI TBSS)	31355	Mean ISOVF (isotropic or free water volume fraction) in fornix cres+stria terminalis (right) on FA (fractional anisotropy) skeleton (from dMRI data)
ISOVF in the left fornix and stria terminalis	IDP.2091	25479	0.0422106	AU	Association fibers	WM tract ISOVF	Diffusion MRI	Diffusion-weighted imaging (dMRI TBSS)	31355	Mean ISOVF (isotropic or free water volume fraction) in fornix cres+stria terminalis (left) on FA (fractional anisotropy) skeleton (from dMRI data)
ISOVF in the right superior longitudinal fasciculus	IDP.2092	25480	0.0158841	AU	Association fibers	WM tract ISOVF	Diffusion MRI	Diffusion-weighted imaging (dMRI TBSS)	31355	Mean ISOVF (isotropic or free water volume fraction) in superior longitudinal fasciculus (right) on FA (fractional anisotropy) skeleton (from dMRI dat
ISOVF in the left superior longitudinal fasciculus	IDP.2093	25481	0.0137059	AU	Association fibers	WM tract ISOVF	Diffusion MRI	Diffusion-weighted imaging (dMRI TBSS)	31355	Mean ISOVF (isotropic or free water volume fraction) in superior longitudinal fasciculus (left) on FA (fractional anisotropy) skeleton (from dMRI data
ISOVF in the right superior fronto-occipital fasciculus	IDP.2094	25482	0.031553	AU	Association fibers	WM tract ISOVF	Diffusion MRI	Diffusion-weighted imaging (dMRI TBSS)	31355	Mean ISOVF (isotropic or free water volume fraction) in superior fronto-occipital fasciculus (right) on FA (fractional anisotropy) skeleton (from dMRI
ISOVF in the left superior fronto-occipital fasciculus	IDP.2095	25483	0.0369177	AU	Association fibers	WM tract ISOVF	Diffusion MRI	Diffusion-weighted imaging (dMRI TBSS)	31355	Mean ISOVF (isotropic or free water volume fraction) in superior fronto-occipital fasciculus (left) on FA (fractional anisotropy) skeleton (from dMRI
ISOVF in the right uncinate fasciculus	IDP.2096	25484	0.0138282	AU	Association fibers	WM tract ISOVF	Diffusion MRI	Diffusion-weighted imaging (dMRI TBSS)	31355	Mean ISOVF (isotropic or free water volume fraction) in uncinate fasciculus (right) on FA (fractional anisotropy) skeleton (from dMRI data)
ISOVF in the left uncinate fasciculus	IDP.2097	25485	0.0147987	AU	Association fibers	WM tract ISOVF	Diffusion MRI	Diffusion-weighted imaging (dMRI TBSS)	31355	Mean ISOVF (isotropic or free water volume fraction) in uncinate fasciculus (left) on FA (fractional anisotropy) skeleton (from dMRI data)
ISOVF in the right tapetum	IDP.2098	25486	0.0779386	AU	Commissural fibers	WM tract ISOVF	Diffusion MRI	Diffusion-weighted imaging (dMRI TBSS)	31355	Mean ISOVF (isotropic or free water volume fraction) in tapetum (right) on FA (fractional anisotropy) skeleton (from dMRI data)
ISOVF in the left tapetum	IDP.2099	25487	0.0821031	AU	Commissural fibers	WM tract ISOVF	Diffusion MRI	Diffusion-weighted imaging (dMRI TBSS)	31355	Mean ISOVF (isotropic or free water volume fraction) in tapetum (left) on FA (fractional anisotropy) skeleton (from dMRI data)
ISOVF in the left acoustic radiation	IDP.2100	25704	0.0203851	AU	Projection fibers	WM tract ISOVF	Diffusion MRI	Diffusion-weighted imaging (dMRI Probtrack)	31354	Weighted-mean ISOVF (isotropic or free water volume fraction) in tract left acoustic radiation (from dMRI data)
ISOVF in the right acoustic radiation	IDP.2101	25705	0.020243	AU	Projection fibers	WM tract ISOVF	Diffusion MRI	Diffusion-weighted imaging (dMRI Probtrack)	31354	Weighted-mean ISOVF (isotropic or free water volume fraction) in tract right acoustic radiation (from dMRI data)
ISOVF in the left anterior thalamic radiation	IDP.2102	25706	0.0163502	AU	Projection fibers	WM tract ISOVF	Diffusion MRI	Diffusion-weighted imaging (dMRI Probtrack)	31354	Weighted-mean ISOVF (isotropic or free water volume fraction) in tract left anterior thalamic radiation (from dMRI data)
ISOVF in the right anterior thalamic radiation	IDP.2103	25707	0.0155226	AU	Projection fibers	WM tract ISOVF	Diffusion MRI	Diffusion-weighted imaging (dMRI Probtrack)	31354	Weighted-mean ISOVF (isotropic or free water volume fraction) in tract right anterior thalamic radiation (from dMRI data)
ISOVF in the forceps major	IDP.2110	25714	0.028291	AU	Commissural fibers	WM tract ISOVF	Diffusion MRI	Diffusion-weighted imaging (dMRI Probtrack)	31354	Weighted-mean ISOVF (isotropic or free water volume fraction) in tract forceps major (from dMRI data)
ISOVF in the forceps minor	IDP.2111	25715	0.0157094	AU	Commissural fibers	WM tract ISOVF	Diffusion MRI	Diffusion-weighted imaging (dMRI Probtrack)	31354	Weighted-mean ISOVF (isotropic or free water volume fraction) in tract forceps minor (from dMRI data)
ISOVF in the left inferior fronto-occipital fasciculus	IDP.2112	25716	0.0134455	AU	Association fibers	WM tract ISOVF	Diffusion MRI	Diffusion-weighted imaging (dMRI Probtrack)	31354	Weighted-mean ISOVF (isotropic or free water volume fraction) in tract left inferior fronto-occipital fasciculus (from dMRI data)
ISOVF in the right inferior fronto-occipital fasciculus	IDP.2113	25717	0.0144877	AU	Association fibers	WM tract ISOVF	Diffusion MRI	Diffusion-weighted imaging (dMRI Probtrack)	31354	Weighted-mean ISOVF (isotropic or free water volume fraction) in tract right inferior fronto-occipital fasciculus (from dMRI data)
ISOVF in the left inferior longitudinal fasciculus	IDP.2114	25718	0.0139697	AU	Association fibers	WM tract ISOVF	Diffusion MRI	Diffusion-weighted imaging (dMRI Probtrack)	31354	Weighted-mean ISOVF (isotropic or free water volume fraction) in tract left inferior longitudinal fasciculus (from dMRI data)
ISOVF in the right inferior longitudinal fasciculus	IDP.2115	25719	0.0149618	AU	Association fibers	WM tract ISOVF	Diffusion MRI	Diffusion-weighted imaging (dMRI Probtrack)	31354	Weighted-mean ISOVF (isotropic or free water volume fraction) in tract right inferior longitudinal fasciculus (from dMRI data)
ISOVF in the left superior thalamic radiation	IDP.2123	25727	0.014086	AU	Projection fibers	WM tract ISOVF	Diffusion MRI	Diffusion-weighted imaging (dMRI Probtrack)	31354	Weighted-mean ISOVF (isotropic or free water volume fraction) in tract left superior thalamic radiation (from dMRI data)
ISOVF in the right superior thalamic radiation	IDP.2124	25728	0.0147839	AU	Projection fibers	WM tract ISOVF	Diffusion MRI	Diffusion-weighted imaging (dMRI Probtrack)	31354	Weighted-mean ISOVF (isotropic or free water volume fraction) in tract right superior thalamic radiation (from dMRI data)

## Sheet: Table S7
Supplementary Table 7: LDSC-based genetic correlation of SCZ and IDPs
IDP.ID	Disorder	Rg	SE	Z score	P value
IDP.1992	SCZ	-0.2074	0.0527	-3.9321	8.4224e-05
IDP.1991	SCZ	-0.1813	0.0571	-3.1729	0.0015
IDP.2019	SCZ	-0.1848	0.0588	-3.1432	0.0017
IDP.2057	SCZ	-0.1956	0.0622	-3.1466	0.0017
IDP.1495	SCZ	0.1748	0.0566	3.0862	0.002
IDP.0174	SCZ	-0.1672	0.0545	-3.0662	0.0022
IDP.1607	SCZ	-0.1974	0.0658	-3.0012	0.0027
IDP.1542	SCZ	0.1749	0.0606	2.888	0.0039
IDP.0191	SCZ	-0.2441	0.087	-2.8051	0.005
IDP.1613	SCZ	-0.2556	0.0915	-2.7937	0.0052
IDP.0193	SCZ	0.1659	0.0602	2.7543	0.0059
IDP.0664	SCZ	-0.19	0.0693	-2.7397	0.0061
IDP.2020	SCZ	-0.1759	0.0644	-2.7308	0.0063
IDP.1457	SCZ	0.1784	0.0654	2.7262	0.0064
IDP.0194	SCZ	0.1304	0.0487	2.6763	0.0074
IDP.0709	SCZ	-0.1729	0.0654	-2.6451	0.0082
IDP.1494	SCZ	0.1563	0.0598	2.6136	0.009
IDP.0208	SCZ	-0.183	0.0717	-2.5523	0.0107
IDP.0210	SCZ	0.1491	0.0588	2.5358	0.0112
IDP.0403	SCZ	-0.1846	0.0731	-2.5236	0.0116
IDP.0211	SCZ	0.1248	0.0498	2.5049	0.0122
IDP.1546	SCZ	-0.1174	0.0475	-2.471	0.0135
IDP.0651	SCZ	-0.2244	0.0912	-2.4619	0.0138
IDP.1541	SCZ	0.1494	0.0608	2.4564	0.014
IDP.1467	SCZ	0.1448	0.0629	2.3024	0.0213
IDP.1993	SCZ	-0.1301	0.0568	-2.2899	0.022
IDP.1999	SCZ	-0.1292	0.057	-2.2684	0.0233
IDP.1982	SCZ	-0.1803	0.0796	-2.2656	0.0235
IDP.0015	SCZ	0.1451	0.0642	2.2622	0.0237
IDP.0700	SCZ	-0.1845	0.0819	-2.2541	0.0242
IDP.1640	SCZ	-0.1702	0.0781	-2.1789	0.0293
IDP.1612	SCZ	-0.1617	0.0742	-2.178	0.0294
IDP.2000	SCZ	-0.1379	0.0636	-2.1684	0.0301
IDP.2086	SCZ	0.2288	0.1064	2.15	0.0316
IDP.0346	SCZ	-0.2983	0.1398	-2.1338	0.0329
IDP.0024	SCZ	0.2001	0.0944	2.1204	0.034
IDP.1995	SCZ	0.102	0.0482	2.1157	0.0344
IDP.0366	SCZ	-0.1914	0.091	-2.1046	0.0353
IDP.1616	SCZ	0.1287	0.0612	2.1036	0.0354
IDP.0012	SCZ	0.1522	0.0731	2.0812	0.0374
IDP.0675	SCZ	-0.1074	0.0516	-2.0814	0.0374
IDP.1980	SCZ	-0.1559	0.075	-2.079	0.0376
IDP.2038	SCZ	-0.1318	0.0645	-2.0445	0.0409
IDP.2090	SCZ	-0.2741	0.1341	-2.0441	0.0409
IDP.0359	SCZ	-0.2015	0.1006	-2.0032	0.0452
IDP.1039	SCZ	0.129	0.0651	1.9815	0.0475
IDP.1530	SCZ	0.1373	0.0694	1.9773	0.048
IDP.2011	SCZ	-0.1455	0.0738	-1.9701	0.0488
IDP.0364	SCZ	-0.1575	0.0799	-1.9696	0.0489
IDP.1544	SCZ	-0.1019	0.0528	-1.9314	0.0534
IDP.0669	SCZ	-0.1732	0.0897	-1.9297	0.0536
IDP.1543	SCZ	-0.1004	0.053	-1.8956	0.058
IDP.2026	SCZ	0.1946	0.1027	1.8954	0.058
IDP.0388	SCZ	-0.1263	0.067	-1.8849	0.0594
IDP.0708	SCZ	-0.1031	0.0552	-1.8697	0.0615
IDP.0653	SCZ	-0.1377	0.0738	-1.8648	0.0622
IDP.0673	SCZ	-0.1295	0.07	-1.8493	0.0644
IDP.1569	SCZ	0.2411	0.1304	1.849	0.0645
IDP.2081	SCZ	0.142	0.078	1.8217	0.0685
IDP.0671	SCZ	-0.1423	0.0783	-1.8165	0.0693
IDP.0018	SCZ	0.106	0.0585	1.8123	0.0699
IDP.0023	SCZ	0.162	0.0898	1.8048	0.0711
IDP.1475	SCZ	0.1118	0.062	1.8051	0.0711
IDP.1917	SCZ	-0.1135	0.0632	-1.7956	0.0726
IDP.1590	SCZ	-0.1139	0.0635	-1.7931	0.073
IDP.1545	SCZ	-0.0917	0.0514	-1.7853	0.0742
IDP.0693	SCZ	-0.1448	0.0814	-1.7781	0.0754
IDP.0652	SCZ	-0.0999	0.0566	-1.7643	0.0777
IDP.2036	SCZ	-0.1241	0.0712	-1.7424	0.0814
IDP.0362	SCZ	0.2642	0.1521	1.7373	0.0823
IDP.1474	SCZ	0.1071	0.0623	1.719	0.0856
IDP.1916	SCZ	-0.1026	0.0603	-1.7031	0.0886
IDP.0368	SCZ	-0.117	0.069	-1.6974	0.0896
IDP.0011	SCZ	0.1224	0.0723	1.6933	0.0904
IDP.0703	SCZ	-0.1253	0.0742	-1.6885	0.0913
IDP.1038	SCZ	0.1469	0.0871	1.6867	0.0917
IDP.0014	SCZ	0.117	0.0699	1.6741	0.0941
IDP.1072	SCZ	0.141	0.0849	1.6601	0.0969
IDP.0648	SCZ	-0.088	0.0533	-1.6513	0.0987
IDP.2053	SCZ	0.1453	0.088	1.6506	0.0988
IDP.0654	SCZ	-0.1147	0.07	-1.6382	0.1014
IDP.2095	SCZ	-0.1551	0.095	-1.6336	0.1024
IDP.1649	SCZ	-0.0987	0.0607	-1.6258	0.104
IDP.0370	SCZ	-0.1	0.0617	-1.6205	0.1051
IDP.0402	SCZ	-0.083	0.0516	-1.609	0.1076
IDP.2010	SCZ	-0.0811	0.0509	-1.5935	0.111
IDP.0016	SCZ	0.0926	0.0583	1.5881	0.1123
IDP.1473	SCZ	-0.1105	0.0696	-1.5881	0.1123
IDP.1073	SCZ	0.0977	0.0619	1.5786	0.1144
IDP.1491	SCZ	0.1163	0.0743	1.5654	0.1175
IDP.2080	SCZ	0.1551	0.0991	1.5646	0.1177
IDP.1540	SCZ	0.1436	0.0924	1.5535	0.1203
IDP.0179	SCZ	-0.1161	0.0758	-1.5316	0.1256
IDP.2093	SCZ	0.1456	0.095	1.5319	0.1256
IDP.1067	SCZ	0.1264	0.0829	1.524	0.1275
IDP.1556	SCZ	0.1025	0.0673	1.524	0.1275
IDP.1488	SCZ	-0.1181	0.0778	-1.5186	0.1289
IDP.0372	SCZ	0.0889	0.0594	1.4971	0.1344
IDP.1996	SCZ	0.0713	0.048	1.4861	0.1373
IDP.1588	SCZ	0.0903	0.0609	1.4826	0.1382
IDP.1555	SCZ	0.1054	0.0712	1.4804	0.1388
IDP.1561	SCZ	0.1069	0.0728	1.4684	0.142
IDP.1501	SCZ	-0.0947	0.0647	-1.4644	0.1431
IDP.2013	SCZ	0.1176	0.0804	1.4628	0.1435
IDP.0353	SCZ	-0.1004	0.069	-1.4537	0.146
IDP.0348	SCZ	-0.1129	0.0778	-1.451	0.1468
IDP.1461	SCZ	0.0969	0.0668	1.45	0.1471
IDP.0355	SCZ	-0.1158	0.0801	-1.4453	0.1484
IDP.1490	SCZ	0.1	0.0695	1.4386	0.1503
IDP.0349	SCZ	-0.1104	0.0773	-1.4273	0.1535
IDP.1603	SCZ	0.1193	0.084	1.4202	0.1555
IDP.2110	SCZ	0.1	0.0705	1.4181	0.1562
IDP.0347	SCZ	-0.0872	0.0616	-1.4137	0.1574
IDP.0695	SCZ	-0.083	0.0587	-1.4131	0.1576
IDP.0668	SCZ	-0.0676	0.0482	-1.4035	0.1605
IDP.0387	SCZ	-0.1116	0.0797	-1.3994	0.1617
IDP.0397	SCZ	-0.0892	0.0641	-1.3918	0.164
IDP.1486	SCZ	0.1004	0.0725	1.3855	0.1659
IDP.1566	SCZ	0.0998	0.0723	1.3815	0.1671
IDP.0697	SCZ	0.1325	0.0959	1.3812	0.1672
IDP.0694	SCZ	-0.078	0.0565	-1.3801	0.1676
IDP.0013	SCZ	0.0944	0.0686	1.3758	0.1689
IDP.1460	SCZ	0.1071	0.0781	1.37	0.1707
IDP.1464	SCZ	0.0887	0.0652	1.3619	0.1732
IDP.1563	SCZ	-0.1195	0.0882	-1.3544	0.1756
IDP.0380	SCZ	-0.0787	0.0581	-1.3538	0.1758
IDP.0682	SCZ	-0.0686	0.0511	-1.3426	0.1794
IDP.0354	SCZ	-0.0802	0.0598	-1.3415	0.1798
IDP.0685	SCZ	-0.0796	0.0597	-1.3349	0.1819
IDP.1641	SCZ	-0.1709	0.1288	-1.327	0.1845
IDP.1492	SCZ	0.1057	0.0806	1.3119	0.1896
IDP.2099	SCZ	-0.0822	0.0627	-1.3114	0.1897
IDP.1565	SCZ	0.1011	0.0773	1.3084	0.1907
IDP.2064	SCZ	-0.0708	0.0541	-1.3067	0.1913
IDP.1547	SCZ	-0.1044	0.0804	-1.2985	0.1941
IDP.2111	SCZ	0.1151	0.0887	1.2981	0.1942
IDP.2006	SCZ	-0.0831	0.0644	-1.2889	0.1974
IDP.0658	SCZ	-0.0958	0.0746	-1.2852	0.1987
IDP.1585	SCZ	0.1005	0.0782	1.2848	0.1989
IDP.0667	SCZ	0.1126	0.088	1.2794	0.2007
IDP.1550	SCZ	0.0902	0.0708	1.2736	0.2028
IDP.1485	SCZ	0.0851	0.0671	1.2685	0.2046
IDP.0379	SCZ	-0.0871	0.0687	-1.2669	0.2052
IDP.1463	SCZ	0.0896	0.0708	1.2655	0.2057
IDP.1462	SCZ	0.0746	0.0591	1.2633	0.2065
IDP.1626	SCZ	-0.1035	0.0821	-1.26	0.2077
IDP.2123	SCZ	0.0964	0.0768	1.256	0.2091
IDP.1528	SCZ	-0.0768	0.0613	-1.2522	0.2105
IDP.1936	SCZ	0.0667	0.0536	1.2437	0.2136
IDP.2014	SCZ	-0.0931	0.075	-1.2408	0.2147
IDP.1487	SCZ	0.0797	0.0644	1.2378	0.2158
IDP.2005	SCZ	-0.0911	0.0737	-1.2353	0.2167
IDP.0178	SCZ	-0.0863	0.0701	-1.2317	0.2181
IDP.1935	SCZ	0.0746	0.0606	1.2303	0.2186
IDP.2017	SCZ	-0.0665	0.0541	-1.2285	0.2193
IDP.0360	SCZ	0.1805	0.147	1.2279	0.2195
IDP.1532	SCZ	0.0941	0.0771	1.2208	0.2222
IDP.2024	SCZ	0.1314	0.1079	1.218	0.2232
IDP.0375	SCZ	-0.084	0.0698	-1.2038	0.2287
IDP.0393	SCZ	-0.1222	0.1023	-1.1953	0.232
IDP.1037	SCZ	0.084	0.0708	1.1863	0.2355
IDP.1945	SCZ	0.0675	0.0572	1.1801	0.2379
IDP.0392	SCZ	-0.0902	0.0766	-1.1783	0.2387
IDP.1574	SCZ	-0.0905	0.0769	-1.1772	0.2391
IDP.1994	SCZ	-0.0726	0.0628	-1.1561	0.2476
IDP.1986	SCZ	-0.0965	0.0837	-1.153	0.2489
IDP.1906	SCZ	0.068	0.0592	1.149	0.2505
IDP.1950	SCZ	0.0642	0.0562	1.1432	0.253
IDP.0401	SCZ	0.1021	0.0895	1.1405	0.2541
IDP.1615	SCZ	-0.0597	0.0527	-1.1336	0.257
IDP.0699	SCZ	-0.212	0.1872	-1.1329	0.2573
IDP.0399	SCZ	-0.0812	0.0718	-1.1316	0.2578
IDP.1548	SCZ	-0.075	0.0667	-1.125	0.2606
IDP.0377	SCZ	0.1129	0.1005	1.1239	0.261
IDP.0381	SCZ	-0.0759	0.0675	-1.1241	0.261
IDP.1598	SCZ	-0.0705	0.0636	-1.1086	0.2676
IDP.0674	SCZ	-0.0689	0.0622	-1.108	0.2679
IDP.0369	SCZ	-0.0758	0.0685	-1.1051	0.2691
IDP.1465	SCZ	0.0686	0.062	1.1052	0.2691
IDP.1586	SCZ	0.0823	0.0747	1.1018	0.2705
IDP.1979	SCZ	-0.075	0.0685	-1.0948	0.2736
IDP.1981	SCZ	0.059	0.0544	1.0843	0.2782
IDP.1926	SCZ	0.0673	0.0621	1.0842	0.2783
IDP.1553	SCZ	-0.0712	0.0659	-1.0803	0.28
IDP.0659	SCZ	-0.0612	0.0567	-1.0786	0.2808
IDP.1614	SCZ	-0.0527	0.0491	-1.0723	0.2836
IDP.2091	SCZ	-0.1344	0.1258	-1.0683	0.2854
IDP.0025	SCZ	0.0594	0.0558	1.0649	0.2869
IDP.0363	SCZ	-0.0549	0.0516	-1.0637	0.2875
IDP.1645	SCZ	-0.1029	0.0979	-1.0513	0.2931
IDP.2048	SCZ	0.0728	0.0695	1.0471	0.2951
IDP.2094	SCZ	-0.078	0.0749	-1.0408	0.298
IDP.1560	SCZ	0.0527	0.0508	1.0382	0.2992
IDP.1459	SCZ	0.1387	0.1338	1.0365	0.3
IDP.1949	SCZ	0.0751	0.0732	1.0248	0.3054
IDP.0650	SCZ	-0.0753	0.0737	-1.022	0.3068
IDP.0681	SCZ	-0.066	0.0648	-1.0197	0.3079
IDP.0345	SCZ	-0.0859	0.0844	-1.0184	0.3085
IDP.2016	SCZ	-0.0934	0.0919	-1.0164	0.3094
IDP.1470	SCZ	-0.0555	0.0548	-1.0133	0.3109
IDP.0686	SCZ	-0.0564	0.0559	-1.0094	0.3128
IDP.0687	SCZ	-0.0647	0.0646	-1.0023	0.3162
IDP.1637	SCZ	-0.0729	0.0731	-0.9978	0.3184
IDP.0376	SCZ	-0.0511	0.0513	-0.9958	0.3193
IDP.0689	SCZ	0.067	0.0673	0.9951	0.3197
IDP.1539	SCZ	0.1166	0.1177	0.9903	0.322
IDP.1570	SCZ	0.1051	0.1065	0.9871	0.3236
IDP.0698	SCZ	-0.0553	0.0562	-0.9832	0.3255
IDP.1032	SCZ	-0.0961	0.098	-0.9811	0.3266
IDP.2058	SCZ	0.0652	0.0666	0.9783	0.3279
IDP.1903	SCZ	0.082	0.0839	0.977	0.3286
IDP.1985	SCZ	-0.091	0.0934	-0.9749	0.3296
IDP.1797	SCZ	-0.0686	0.0704	-0.9746	0.3298
IDP.1934	SCZ	0.0529	0.0549	0.9639	0.3351
IDP.0386	SCZ	-0.0681	0.0707	-0.9626	0.3358
IDP.1804	SCZ	0.0638	0.0667	0.9574	0.3384
IDP.1567	SCZ	0.0597	0.0629	0.948	0.3431
IDP.1552	SCZ	-0.0584	0.0618	-0.9447	0.3448
IDP.1043	SCZ	-0.0651	0.069	-0.9435	0.3454
IDP.1627	SCZ	-0.0723	0.0766	-0.9434	0.3455
IDP.1066	SCZ	-0.0627	0.0666	-0.9418	0.3463
IDP.1608	SCZ	0.0661	0.0703	0.9405	0.347
IDP.1617	SCZ	0.077	0.0821	0.9378	0.3483
IDP.2065	SCZ	-0.0549	0.0586	-0.9367	0.3489
IDP.1029	SCZ	-0.0629	0.0675	-0.9309	0.3519
IDP.1559	SCZ	0.0552	0.0594	0.9292	0.3528
IDP.0677	SCZ	0.0583	0.063	0.9252	0.3549
IDP.1646	SCZ	0.0923	0.1006	0.9178	0.3587
IDP.1562	SCZ	0.0569	0.0622	0.9138	0.3608
IDP.0404	SCZ	-0.0774	0.0848	-0.912	0.3617
IDP.0021	SCZ	0.0956	0.1049	0.9115	0.362
IDP.1455	SCZ	0.0655	0.0721	0.9091	0.3633
IDP.1466	SCZ	0.0622	0.0687	0.9052	0.3654
IDP.0705	SCZ	-0.0565	0.0625	-0.9043	0.3658
IDP.1056	SCZ	0.1064	0.1179	0.9025	0.3668
IDP.1058	SCZ	-0.065	0.0722	-0.9006	0.3678
IDP.0683	SCZ	0.0741	0.0823	0.9001	0.368
IDP.1476	SCZ	0.0615	0.0685	0.8977	0.3693
IDP.0361	SCZ	0.0611	0.0685	0.8919	0.3725
IDP.1071	SCZ	0.0687	0.077	0.8912	0.3728
IDP.1079	SCZ	0.2016	0.227	0.8881	0.3745
IDP.2003	SCZ	0.0565	0.0641	0.882	0.3778
IDP.0396	SCZ	-0.049	0.0558	-0.8791	0.3794
IDP.1074	SCZ	-0.072	0.0821	-0.8778	0.3801
IDP.1927	SCZ	0.0535	0.0613	0.872	0.3832
IDP.1568	SCZ	0.0577	0.0668	0.8631	0.3881
IDP.1648	SCZ	-0.0675	0.0785	-0.8594	0.3901
IDP.1472	SCZ	-0.0586	0.0682	-0.8588	0.3904
IDP.1523	SCZ	-0.0612	0.0714	-0.8574	0.3912
IDP.1531	SCZ	-0.0501	0.0584	-0.8574	0.3912
IDP.2039	SCZ	-0.0552	0.0652	-0.8467	0.3971
IDP.0394	SCZ	-0.0712	0.0844	-0.8432	0.3991
IDP.0688	SCZ	0.055	0.0653	0.8429	0.3993
IDP.0691	SCZ	-0.0651	0.0782	-0.8317	0.4056
IDP.1618	SCZ	0.0616	0.0745	0.827	0.4083
IDP.1081	SCZ	0.0522	0.0632	0.8267	0.4084
IDP.1498	SCZ	0.0553	0.067	0.8253	0.4092
IDP.1496	SCZ	-0.0508	0.0617	-0.8243	0.4098
IDP.2027	SCZ	-0.0465	0.0569	-0.8164	0.4143
IDP.1939	SCZ	-0.0456	0.0559	-0.8156	0.4147
IDP.1997	SCZ	0.0495	0.061	0.8116	0.417
IDP.2103	SCZ	-0.0668	0.0828	-0.806	0.4203
IDP.1064	SCZ	-0.0477	0.0598	-0.7981	0.4248
IDP.1599	SCZ	-0.0417	0.0532	-0.7843	0.4329
IDP.0408	SCZ	-0.0675	0.0861	-0.7833	0.4334
IDP.0660	SCZ	-0.0509	0.0653	-0.7782	0.4364
IDP.1503	SCZ	0.0507	0.0651	0.7781	0.4365
IDP.1080	SCZ	0.0492	0.0637	0.7729	0.4396
IDP.1818	SCZ	-0.0552	0.0715	-0.7726	0.4398
IDP.0383	SCZ	0.0533	0.0695	0.7663	0.4435
IDP.0378	SCZ	0.0707	0.0935	0.7564	0.4494
IDP.2087	SCZ	-0.0574	0.0759	-0.7556	0.4499
IDP.1636	SCZ	0.0543	0.072	0.7534	0.4512
IDP.2008	SCZ	-0.057	0.076	-0.7503	0.453
IDP.1068	SCZ	0.0544	0.0726	0.7499	0.4533
IDP.1527	SCZ	-0.0513	0.0685	-0.7495	0.4535
IDP.0715	SCZ	-0.0485	0.0647	-0.7492	0.4537
IDP.0665	SCZ	0.0753	0.101	0.7452	0.4561
IDP.1942	SCZ	0.0397	0.0534	0.7433	0.4573
IDP.1046	SCZ	0.0393	0.0533	0.7389	0.46
IDP.1044	SCZ	0.0574	0.0778	0.7386	0.4602
IDP.0710	SCZ	-0.0549	0.0744	-0.7375	0.4608
IDP.1551	SCZ	-0.0436	0.0593	-0.7356	0.462
IDP.2009	SCZ	-0.0403	0.0554	-0.728	0.4666
IDP.1535	SCZ	0.0602	0.0828	0.7274	0.467
IDP.0020	SCZ	-0.0501	0.0691	-0.7257	0.468
IDP.2092	SCZ	0.0762	0.1055	0.723	0.4697
IDP.1918	SCZ	-0.0388	0.0539	-0.7205	0.4712
IDP.2085	SCZ	0.054	0.0751	0.7194	0.4719
IDP.1623	SCZ	0.0604	0.0845	0.714	0.4752
IDP.2089	SCZ	-0.0537	0.0753	-0.7128	0.476
IDP.1086	SCZ	-0.0588	0.0825	-0.712	0.4765
IDP.1629	SCZ	-0.0515	0.0723	-0.712	0.4765
IDP.0663	SCZ	-0.0536	0.0773	-0.6936	0.4879
IDP.1085	SCZ	0.0924	0.1333	0.6934	0.488
IDP.1929	SCZ	0.0439	0.0633	0.6932	0.4882
IDP.1998	SCZ	0.0493	0.0712	0.6926	0.4886
IDP.1984	SCZ	0.0793	0.1146	0.692	0.489
IDP.1638	SCZ	0.0467	0.0675	0.6918	0.4891
IDP.1022	SCZ	-0.061	0.0885	-0.6893	0.4906
IDP.1042	SCZ	-0.0879	0.1275	-0.6893	0.4906
IDP.1499	SCZ	0.0538	0.0787	0.6833	0.4944
IDP.1990	SCZ	-0.0578	0.0847	-0.6825	0.4949
IDP.0406	SCZ	-0.0704	0.1033	-0.6816	0.4955
IDP.1941	SCZ	0.0374	0.0552	0.6763	0.4988
IDP.0692	SCZ	-0.0482	0.0716	-0.673	0.5009
IDP.1974	SCZ	0.0361	0.0536	0.6731	0.5009
IDP.0409	SCZ	-0.0423	0.063	-0.6726	0.5012
IDP.1502	SCZ	0.0459	0.0688	0.6683	0.5039
IDP.1040	SCZ	0.0856	0.1286	0.6656	0.5057
IDP.0649	SCZ	0.0519	0.078	0.6646	0.5063
IDP.1023	SCZ	-0.0431	0.0652	-0.6612	0.5085
IDP.1907	SCZ	0.0538	0.0815	0.6602	0.5091
IDP.1628	SCZ	-0.0469	0.0712	-0.6587	0.5101
IDP.1943	SCZ	0.0382	0.0585	0.6523	0.5142
IDP.2083	SCZ	-0.0517	0.0792	-0.6521	0.5144
IDP.1471	SCZ	-0.034	0.0522	-0.6515	0.5147
IDP.2018	SCZ	-0.0407	0.0625	-0.6515	0.5147
IDP.1631	SCZ	0.0578	0.0889	0.6503	0.5155
IDP.2115	SCZ	0.0728	0.1134	0.6425	0.5206
IDP.1536	SCZ	0.0666	0.104	0.64	0.5222
IDP.0395	SCZ	0.0524	0.0819	0.6395	0.5225
IDP.2102	SCZ	-0.0598	0.0936	-0.6384	0.5232
IDP.2007	SCZ	-0.0352	0.0552	-0.6367	0.5243
IDP.2012	SCZ	-0.0435	0.0685	-0.6354	0.5252
IDP.1987	SCZ	-0.046	0.0724	-0.6353	0.5253
IDP.2074	SCZ	0.0429	0.0676	0.6345	0.5257
IDP.1468	SCZ	0.0382	0.061	0.6258	0.5315
IDP.1484	SCZ	0.0386	0.062	0.6216	0.5342
IDP.1989	SCZ	-0.0488	0.0792	-0.6167	0.5374
IDP.1944	SCZ	0.0338	0.055	0.6149	0.5386
IDP.1796	SCZ	-0.0533	0.0872	-0.6115	0.5409
IDP.1805	SCZ	0.0433	0.0712	0.6085	0.5429
IDP.1904	SCZ	0.0333	0.0551	0.6047	0.5454
IDP.1533	SCZ	-0.0517	0.086	-0.6012	0.5477
IDP.1456	SCZ	-0.0467	0.0782	-0.598	0.5498
IDP.1572	SCZ	-0.04	0.067	-0.5969	0.5506
IDP.1558	SCZ	-0.0462	0.0777	-0.5946	0.5521
IDP.0175	SCZ	0.0378	0.0638	0.5927	0.5534
IDP.0374	SCZ	-0.0726	0.1237	-0.5866	0.5575
IDP.1937	SCZ	0.0297	0.0508	0.5858	0.558
IDP.2002	SCZ	0.0405	0.0693	0.5841	0.5592
IDP.2066	SCZ	0.0753	0.1295	0.5813	0.561
IDP.2072	SCZ	0.0746	0.1283	0.5812	0.5611
IDP.1630	SCZ	0.0499	0.0862	0.5783	0.563
IDP.0385	SCZ	-0.0446	0.0772	-0.5783	0.5631
IDP.2035	SCZ	-0.0439	0.0764	-0.5753	0.5651
IDP.0022	SCZ	-0.0442	0.0775	-0.5706	0.5683
IDP.1514	SCZ	0.0472	0.0837	0.5641	0.5727
IDP.1060	SCZ	0.0349	0.062	0.563	0.5734
IDP.1973	SCZ	0.0319	0.0566	0.5631	0.5734
IDP.1027	SCZ	0.0347	0.0617	0.563	0.5735
IDP.0655	SCZ	-0.0516	0.0924	-0.5589	0.5762
IDP.1919	SCZ	-0.0304	0.0544	-0.5584	0.5766
IDP.2084	SCZ	0.0699	0.1255	0.5573	0.5773
IDP.1458	SCZ	0.0457	0.0821	0.5564	0.578
IDP.1910	SCZ	0.0357	0.065	0.5492	0.5829
IDP.1041	SCZ	-0.0367	0.0679	-0.5409	0.5886
IDP.1925	SCZ	0.0328	0.0607	0.5399	0.5893
IDP.0662	SCZ	0.0366	0.0678	0.5397	0.5894
IDP.1549	SCZ	0.0342	0.0637	0.5372	0.5911
IDP.0661	SCZ	-0.1449	0.2703	-0.5359	0.5921
IDP.0676	SCZ	-0.0348	0.0659	-0.5288	0.5969
IDP.1021	SCZ	0.0409	0.0779	0.5251	0.5995
IDP.2096	SCZ	-0.0774	0.1474	-0.5251	0.5995
IDP.1469	SCZ	0.0319	0.0609	0.5236	0.6006
IDP.1510	SCZ	-0.0362	0.0702	-0.5163	0.6056
IDP.1928	SCZ	0.0321	0.0624	0.5151	0.6065
IDP.1808	SCZ	-0.0407	0.0792	-0.5142	0.6071
IDP.1644	SCZ	-0.0373	0.0729	-0.512	0.6086
IDP.1084	SCZ	-0.037	0.0729	-0.508	0.6114
IDP.1454	SCZ	0.0319	0.0629	0.5061	0.6128
IDP.1061	SCZ	-0.0325	0.0644	-0.5051	0.6135
IDP.0365	SCZ	-0.0432	0.0856	-0.5047	0.6138
IDP.1632	SCZ	0.0422	0.0837	0.5047	0.6138
IDP.0351	SCZ	-0.0416	0.0829	-0.5022	0.6155
IDP.2101	SCZ	0.046	0.0919	0.5003	0.6168
IDP.1049	SCZ	0.0387	0.0792	0.4895	0.6245
IDP.0666	SCZ	-0.0348	0.0711	-0.4892	0.6247
IDP.1642	SCZ	-0.0303	0.062	-0.4891	0.6248
IDP.1606	SCZ	-0.0347	0.0712	-0.4865	0.6266
IDP.2040	SCZ	0.0305	0.0627	0.4859	0.627
IDP.0350	SCZ	-0.0398	0.0823	-0.4839	0.6285
IDP.1493	SCZ	0.035	0.0724	0.4835	0.6287
IDP.1513	SCZ	0.0302	0.0626	0.4822	0.6297
IDP.2028	SCZ	-0.0301	0.0631	-0.478	0.6326
IDP.0344	SCZ	0.0365	0.0766	0.4762	0.6339
IDP.0702	SCZ	-0.0243	0.0511	-0.4752	0.6346
IDP.1938	SCZ	-0.0293	0.0617	-0.4743	0.6353
IDP.1033	SCZ	0.0666	0.1411	0.4723	0.6367
IDP.2069	SCZ	-0.0475	0.1016	-0.4673	0.6403
IDP.1477	SCZ	0.034	0.0735	0.4626	0.6436
IDP.2023	SCZ	-0.0554	0.1201	-0.4614	0.6445
IDP.2061	SCZ	-0.1065	0.2338	-0.4556	0.6487
IDP.0706	SCZ	0.0397	0.0883	0.4496	0.653
IDP.1453	SCZ	-0.0449	0.1005	-0.4465	0.6552
IDP.1920	SCZ	0.0233	0.0523	0.4453	0.6561
IDP.1052	SCZ	-0.0364	0.0825	-0.4412	0.6591
IDP.0390	SCZ	0.0338	0.0767	0.4407	0.6594
IDP.2100	SCZ	0.1367	0.3108	0.4399	0.66
IDP.1947	SCZ	0.0302	0.0694	0.4345	0.6639
IDP.1806	SCZ	-0.0311	0.0726	-0.4292	0.6678
IDP.1604	SCZ	-0.0238	0.0556	-0.428	0.6687
IDP.2071	SCZ	0.0537	0.1262	0.426	0.6701
IDP.1055	SCZ	0.0396	0.0931	0.4249	0.6709
IDP.2070	SCZ	0.3518	0.8302	0.4238	0.6717
IDP.2098	SCZ	-0.0344	0.0816	-0.4216	0.6733
IDP.1924	SCZ	0.0232	0.0559	0.4148	0.6783
IDP.1619	SCZ	0.0284	0.0695	0.409	0.6825
IDP.2037	SCZ	-0.0318	0.0778	-0.4082	0.6832
IDP.1078	SCZ	0.0292	0.0718	0.4075	0.6836
IDP.2076	SCZ	-0.0413	0.1017	-0.4058	0.6849
IDP.1028	SCZ	0.0264	0.0651	0.4056	0.685
IDP.0712	SCZ	-0.0398	0.0986	-0.4038	0.6864
IDP.1933	SCZ	-0.0258	0.064	-0.4036	0.6865
IDP.1633	SCZ	0.0322	0.0809	0.3975	0.691
IDP.1489	SCZ	0.029	0.073	0.3972	0.6912
IDP.1082	SCZ	-0.0273	0.0689	-0.3969	0.6914
IDP.1921	SCZ	0.0232	0.059	0.3932	0.6941
IDP.2114	SCZ	-0.0329	0.0842	-0.3909	0.6959
IDP.0713	SCZ	-0.0442	0.114	-0.3879	0.6981
IDP.1026	SCZ	0.0326	0.0843	0.386	0.6995
IDP.0656	SCZ	-0.0268	0.0701	-0.382	0.7025
IDP.1030	SCZ	-0.0302	0.0792	-0.3812	0.7031
IDP.0367	SCZ	0.0307	0.0813	0.3775	0.7058
IDP.1025	SCZ	0.029	0.0778	0.3727	0.7094
IDP.1578	SCZ	0.0309	0.083	0.3726	0.7095
IDP.0358	SCZ	-0.0224	0.0605	-0.37	0.7114
IDP.1077	SCZ	-0.0246	0.0667	-0.3686	0.7124
IDP.1481	SCZ	0.033	0.0916	0.3601	0.7188
IDP.1515	SCZ	-0.0234	0.065	-0.36	0.7189
IDP.1931	SCZ	0.0256	0.0715	0.3583	0.7201
IDP.1573	SCZ	0.0316	0.0883	0.3579	0.7204
IDP.1605	SCZ	-0.0237	0.0666	-0.3565	0.7215
IDP.1953	SCZ	0.0193	0.0542	0.3558	0.722
IDP.2025	SCZ	-0.0312	0.088	-0.3546	0.7229
IDP.1479	SCZ	0.0257	0.0727	0.3535	0.7237
IDP.1913	SCZ	-0.0221	0.0627	-0.3519	0.7249
IDP.2015	SCZ	-0.0292	0.0834	-0.3506	0.7259
IDP.0384	SCZ	0.0247	0.0715	0.3463	0.7291
IDP.2049	SCZ	0.0188	0.0553	0.3399	0.7339
IDP.1962	SCZ	0.0199	0.059	0.3382	0.7352
IDP.0357	SCZ	0.0218	0.0648	0.3366	0.7364
IDP.1045	SCZ	-0.0428	0.1272	-0.3367	0.7364
IDP.1961	SCZ	0.0181	0.0543	0.3337	0.7386
IDP.2022	SCZ	-0.0197	0.0595	-0.3316	0.7402
IDP.1083	SCZ	-0.0224	0.0682	-0.3289	0.7422
IDP.1057	SCZ	-0.0234	0.0714	-0.3273	0.7435
IDP.1076	SCZ	0.0913	0.2806	0.3255	0.7448
IDP.0389	SCZ	-0.0217	0.0667	-0.325	0.7452
IDP.0405	SCZ	-0.0196	0.0605	-0.3237	0.7462
IDP.0019	SCZ	-0.0304	0.0947	-0.3213	0.748
IDP.1952	SCZ	0.0169	0.0542	0.3112	0.7557
IDP.1625	SCZ	-0.0213	0.0692	-0.3081	0.758
IDP.2082	SCZ	0.0581	0.189	0.3074	0.7586
IDP.0371	SCZ	-0.0194	0.0638	-0.3042	0.761
IDP.1948	SCZ	0.0243	0.0806	0.3013	0.7632
IDP.1647	SCZ	0.0248	0.083	0.2988	0.7651
IDP.0701	SCZ	0.0222	0.0744	0.2982	0.7656
IDP.2052	SCZ	-0.0297	0.0997	-0.2981	0.7656
IDP.1983	SCZ	-0.0228	0.0782	-0.2911	0.771
IDP.1988	SCZ	-0.0175	0.062	-0.2818	0.7781
IDP.0680	SCZ	-0.0221	0.0784	-0.2814	0.7784
IDP.1069	SCZ	-0.0298	0.1067	-0.2794	0.7799
IDP.0704	SCZ	-0.0191	0.069	-0.2775	0.7814
IDP.1795	SCZ	0.0232	0.0838	0.277	0.7818
IDP.1524	SCZ	-0.0186	0.0672	-0.2769	0.7819
IDP.2055	SCZ	-0.0205	0.074	-0.2766	0.7821
IDP.1571	SCZ	-0.0251	0.0911	-0.2749	0.7834
IDP.2075	SCZ	0.017	0.063	0.2696	0.7875
IDP.1807	SCZ	-0.0193	0.0718	-0.2687	0.7882
IDP.1965	SCZ	0.0148	0.055	0.2686	0.7882
IDP.1609	SCZ	0.0251	0.0935	0.2679	0.7888
IDP.1070	SCZ	-0.0168	0.063	-0.267	0.7895
IDP.0670	SCZ	-0.0198	0.0743	-0.2668	0.7896
IDP.1946	SCZ	-0.0153	0.0587	-0.2604	0.7946
IDP.0017	SCZ	0.0163	0.0626	0.2599	0.795
IDP.1062	SCZ	0.0145	0.0568	0.255	0.7988
IDP.1452	SCZ	0.0183	0.0728	0.2515	0.8014
IDP.1932	SCZ	-0.0153	0.0632	-0.2424	0.8084
IDP.0391	SCZ	0.0189	0.0787	0.2405	0.8099
IDP.0398	SCZ	-0.0169	0.0705	-0.2398	0.8105
IDP.1482	SCZ	-0.0156	0.0664	-0.2342	0.8148
IDP.1564	SCZ	0.0194	0.0838	0.2313	0.8171
IDP.1611	SCZ	-0.0213	0.0928	-0.2294	0.8186
IDP.1500	SCZ	0.0163	0.0712	0.2286	0.8192
IDP.1478	SCZ	0.0169	0.0741	0.2281	0.8196
IDP.1065	SCZ	-0.0265	0.1168	-0.2272	0.8202
IDP.1075	SCZ	0.0152	0.0676	0.2249	0.822
IDP.2113	SCZ	0.0232	0.1041	0.2226	0.8238
IDP.0382	SCZ	0.0144	0.0647	0.2218	0.8245
IDP.0696	SCZ	0.0153	0.069	0.2214	0.8247
IDP.0690	SCZ	0.0133	0.0608	0.2192	0.8265
IDP.1537	SCZ	0.0143	0.0654	0.2188	0.8268
IDP.2001	SCZ	0.0142	0.066	0.2147	0.83
IDP.1480	SCZ	0.0195	0.0933	0.2088	0.8346
IDP.1512	SCZ	0.0164	0.0793	0.2072	0.8358
IDP.1817	SCZ	0.0148	0.072	0.2052	0.8374
IDP.1620	SCZ	0.0144	0.0704	0.2049	0.8376
IDP.0707	SCZ	0.0159	0.0819	0.1947	0.8456
IDP.1964	SCZ	0.0112	0.0576	0.1946	0.8457
IDP.1059	SCZ	-0.0144	0.0751	-0.1925	0.8474
IDP.2068	SCZ	0.019	0.099	0.192	0.8477
IDP.1587	SCZ	0.0129	0.0683	0.1894	0.8498
IDP.1047	SCZ	0.0106	0.0565	0.1873	0.8514
IDP.1529	SCZ	0.0138	0.0736	0.1873	0.8515
IDP.1622	SCZ	0.0142	0.0778	0.1822	0.8554
IDP.1575	SCZ	0.0244	0.1338	0.1821	0.8555
IDP.1036	SCZ	-0.0119	0.066	-0.1805	0.8568
IDP.1534	SCZ	-0.0197	0.1095	-0.18	0.8571
IDP.1577	SCZ	0.014	0.0778	0.1799	0.8572
IDP.1909	SCZ	-0.015	0.0846	-0.1769	0.8596
IDP.1940	SCZ	0.0092	0.0523	0.1765	0.8599
IDP.1053	SCZ	0.0122	0.0709	0.1722	0.8633
IDP.1035	SCZ	-0.0117	0.0728	-0.1603	0.8727
IDP.2112	SCZ	-0.0111	0.071	-0.1568	0.8754
IDP.0684	SCZ	-0.011	0.0707	-0.1561	0.8759
IDP.1051	SCZ	0.0149	0.097	0.1539	0.8777
IDP.1643	SCZ	0.0092	0.0628	0.146	0.8839
IDP.1905	SCZ	0.0087	0.0635	0.1366	0.8913
IDP.2079	SCZ	0.0118	0.0865	0.1362	0.8917
IDP.0407	SCZ	0.0192	0.1474	0.1306	0.8961
IDP.1977	SCZ	0.0097	0.0745	0.13	0.8965
IDP.0352	SCZ	0.0102	0.0785	0.1298	0.8967
IDP.1054	SCZ	0.0075	0.0594	0.1264	0.8994
IDP.1978	SCZ	0.0072	0.0586	0.1237	0.9016
IDP.1915	SCZ	-0.0085	0.0692	-0.1234	0.9018
IDP.1602	SCZ	-0.0127	0.1037	-0.1226	0.9024
IDP.0672	SCZ	0.0087	0.0724	0.1202	0.9043
IDP.1922	SCZ	0.007	0.0586	0.1195	0.9049
IDP.1634	SCZ	-0.0071	0.0605	-0.1168	0.9071
IDP.1908	SCZ	0.0141	0.1208	0.1166	0.9072
IDP.1483	SCZ	-0.0092	0.08	-0.1152	0.9083
IDP.1963	SCZ	0.0061	0.0547	0.1111	0.9115
IDP.1050	SCZ	-0.008	0.0734	-0.1096	0.9127
IDP.1912	SCZ	-0.0061	0.0562	-0.1084	0.9137
IDP.2054	SCZ	-0.0065	0.0602	-0.108	0.914
IDP.2059	SCZ	0.0127	0.118	0.108	0.914
IDP.0400	SCZ	0.0095	0.0893	0.1069	0.9149
IDP.1809	SCZ	-0.0079	0.0802	-0.0986	0.9214
IDP.1554	SCZ	-0.0068	0.0694	-0.0975	0.9224
IDP.1951	SCZ	0.0046	0.0499	0.0927	0.9261
IDP.2021	SCZ	-0.0051	0.0573	-0.0896	0.9286
IDP.2077	SCZ	-0.0074	0.0825	-0.0894	0.9288
IDP.1923	SCZ	0.0063	0.0706	0.089	0.9291
IDP.1914	SCZ	0.0047	0.0547	0.0856	0.9318
IDP.1020	SCZ	0.0054	0.0644	0.0832	0.9337
IDP.1794	SCZ	-0.0092	0.1155	-0.0797	0.9364
IDP.2004	SCZ	-0.0065	0.0874	-0.0749	0.9403
IDP.1024	SCZ	0.0056	0.0778	0.0716	0.9429
IDP.1911	SCZ	-0.0044	0.0613	-0.0715	0.943
IDP.1538	SCZ	-0.0045	0.0632	-0.0708	0.9436
IDP.0373	SCZ	-0.0061	0.0882	-0.0693	0.9447
IDP.1639	SCZ	0.0049	0.0721	0.068	0.9458
IDP.0711	SCZ	-0.004	0.063	-0.0642	0.9488
IDP.1902	SCZ	0.0036	0.0596	0.0604	0.9518
IDP.1624	SCZ	-0.0036	0.0638	-0.057	0.9546
IDP.1621	SCZ	-0.0033	0.0645	-0.0518	0.9587
IDP.2078	SCZ	-0.0037	0.0815	-0.0459	0.9634
IDP.1511	SCZ	0.0026	0.0623	0.0423	0.9663
IDP.1960	SCZ	-0.0026	0.0635	-0.0406	0.9676
IDP.0714	SCZ	0.0024	0.0636	0.0379	0.9697
IDP.1087	SCZ	-0.0031	0.0862	-0.0363	0.971
IDP.1557	SCZ	-0.0021	0.0658	-0.0316	0.9748
IDP.1034	SCZ	0.0021	0.0774	0.0274	0.9781
IDP.0657	SCZ	0.002	0.0756	0.0259	0.9793
IDP.1031	SCZ	-0.0017	0.0751	-0.0231	0.9816
IDP.1930	SCZ	-0.0013	0.071	-0.0186	0.9852
IDP.1063	SCZ	-0.0013	0.0978	-0.0131	0.9896
IDP.0678	SCZ	0.001	0.0879	0.0119	0.9905
IDP.1048	SCZ	-0.0007	0.0587	-0.0116	0.9908
IDP.1635	SCZ	0.0007	0.0651	0.011	0.9912
IDP.0356	SCZ	0.0011	0.175	0.0063	0.995
IDP.1497	SCZ	0.0003	0.061	0.0054	0.9957
IDP.2124	SCZ	-0.0004	0.0886	-0.004	0.9968
IDP.1589	SCZ	0.0001	0.0627	0.0019	0.9985

## Sheet: Table S8
Supplementary Table 8: Forward Mendelian randomization results (IDPs on SCZ)
Exposure	Outcome	IVW, MR-Egger, RAPS										MR-LDP				MERLIN
		N.snps	IVW.beta	IVW.se	IVW.pval	Egger.beta	Egger.se	Egger.pval	Raps.beta	Raps.se	Raps.pval	N.snps	LDP.beta	LDP.se	LDP.pval	N.snps	betaA	betaA.se	betaA.pval	betaI	betaI.se	betaI.pval
IDP.2057	SCZ	51	-0.0117568	0.041052	0.77458	0.0450031	0.201341	0.824062	-0.0127893	0.0335268	0.702859	57	-0.0231147	0.0400567	0.563906	98	-0.023054	0.0355259	0.516381	0.088339	0.0324367	0.0064609
IDP.0174	SCZ	53	0.00995511	0.0452207	0.825758	0.0770587	0.220088	0.727686	0.0111861	0.0327048	0.732326	61	0.0132562	0.0418992	0.751712	96	-0.00658244	0.0338825	0.845962	-0.078473	0.0306068	0.0103501
IDP.0211	SCZ	57	0.0179318	0.033574	0.593275	0.0393305	0.0704888	0.57913	0.0193536	0.0257699	0.452644	74	0.0376066	0.0286022	0.188572	97	0.0387107	0.0309109	0.210448	-0.057471	0.0257282	0.0254978
IDP.2000	SCZ	32	-0.0554546	0.0484229	0.25212	-0.234453	0.303097	0.445264	-0.0599172	0.0427549	0.161091	40	-0.0809754	0.0473153	0.0870074	69	-0.0603225	0.0437644	0.168097	-0.0753229	0.0380679	0.047856
IDP.1542	SCZ	52	0.0142128	0.0462916	0.758822	0.350762	0.175052	0.0505292	0.0157858	0.0331488	0.633924	58	0.0442239	0.0453324	0.329288	94	0.0490577	0.0399223	0.219136	-0.0483795	0.0314153	0.123562
IDP.2011	SCZ	43	0.0165076	0.0344076	0.631394	0.269355	0.179444	0.141004	0.0173587	0.0363695	0.633158	48	0.0482234	0.0364766	0.186155	84	-0.00864865	0.0371849	0.816083	-0.0458205	0.0313927	0.144402
IDP.1457	SCZ	32	0.0248	0.0609972	0.684319	0.0122928	0.258573	0.962397	0.0279605	0.0421444	0.507046	36	0.021036	0.0586236	0.719721	75	-0.00854466	0.0453519	0.850557	-0.0540677	0.0397743	0.174032
IDP.0700	SCZ	43	-0.0266591	0.0426668	0.532089	0.186305	0.17757	0.300237	-0.0287192	0.0396838	0.46925	44	-0.00164281	0.0483631	0.972903	71	-0.0310526	0.0425895	0.465932	0.05248	0.0390239	0.178685
IDP.0364	SCZ	34	-0.0256312	0.0366734	0.484613	-0.0922318	0.0809696	0.26312	-0.0265535	0.0374948	0.478826	39	-0.0471743	0.0331103	0.154226	76	-0.0337385	0.0358258	0.346327	-0.0417872	0.0318329	0.189282
IDP.1993	SCZ	46	-0.127942	0.0431166	0.00300384	-0.293863	0.184103	0.117607	-0.138865	0.0350124	7.30386e-05	51	-0.148336	0.0414364	0.000343802	84	-0.10001	0.0352231	0.00452067	0.0384145	0.0313437	0.220353
IDP.1607	SCZ	48	0.0251559	0.047066	0.593009	-0.0763336	0.225303	0.736299	0.0278382	0.0349249	0.4254	53	0.0165069	0.0450188	0.713868	96	0.00370544	0.0378501	0.922013	0.0392006	0.0320605	0.221441
IDP.0359	SCZ	38	-0.00216311	0.0524621	0.967111	0.424748	0.306611	0.174485	-0.0024013	0.0407099	0.952963	40	0.00316776	0.0538802	0.953117	74	-0.00769502	0.0448506	0.863775	-0.0461886	0.0381584	0.22611
IDP.2020	SCZ	45	0.0159822	0.0441837	0.717559	0.246634	0.229775	0.289093	0.0176204	0.0360232	0.624742	46	0.0273026	0.044478	0.539319	82	0.0298719	0.0403689	0.459316	0.0389984	0.0338583	0.249398
IDP.0403	SCZ	39	-0.0988369	0.0367866	0.00721484	-0.103375	0.153102	0.503746	-0.102952	0.0392488	0.00871404	43	-0.100118	0.0396149	0.011495	80	-0.0737018	0.0403245	0.0675918	-0.0373258	0.0338822	0.270621
IDP.2090	SCZ	32	0.070117	0.04171	0.0927515	-0.0952687	0.170605	0.580704	0.0734855	0.0443322	0.0973958	34	0.047566	0.0504154	0.345435	70	0.036402	0.0431206	0.398564	0.04052	0.0384724	0.29224
IDP.2038	SCZ	39	-0.093365	0.0475369	0.0495241	-0.12949	0.244599	0.599692	-0.10315	0.0378673	0.0064501	44	-0.112223	0.0474416	0.0180064	87	-0.0534489	0.0411805	0.194315	0.0367263	0.035812	0.305112
IDP.1616	SCZ	41	0.00413739	0.0546014	0.939599	0.0425703	0.245342	0.863145	0.00464195	0.0374616	0.901385	48	-0.0173229	0.0506414	0.732298	81	0.0307007	0.0433385	0.478702	-0.0344535	0.0350741	0.325948
IDP.0651	SCZ	36	-0.0162202	0.0360886	0.653102	-0.052755	0.0984593	0.595581	-0.0168584	0.0381196	0.658308	44	-0.0117162	0.0387959	0.762655	66	0.027091	0.042931	0.528016	-0.0363282	0.0370248	0.326501
IDP.0191	SCZ	48	-0.00418295	0.039183	0.914984	0.183685	0.158728	0.253151	-0.0045304	0.0340628	0.894192	57	0.000306484	0.036431	0.993288	91	-0.00338575	0.0373763	0.927822	0.0305748	0.0315858	0.333048
IDP.1613	SCZ	39	0.0364969	0.0411132	0.374693	0.215978	0.196156	0.277986	0.0390393	0.039503	0.323024	45	0.0337365	0.0435621	0.438666	71	-0.0147344	0.0425786	0.729303	0.0329409	0.0361339	0.361962
IDP.1992	SCZ	55	-0.0278073	0.0450353	0.536935	-0.352545	0.162299	0.0343348	-0.0307955	0.0322805	0.340086	64	-0.0431918	0.0431277	0.316592	109	-0.0351593	0.0338606	0.299105	-0.025647	0.0303226	0.39766
IDP.0208	SCZ	42	-0.0437447	0.0354608	0.217349	-0.103296	0.147938	0.48907	-0.0462064	0.0370475	0.212317	49	-0.055415	0.0351498	0.114902	77	-0.0424138	0.0383326	0.268524	-0.0280274	0.033287	0.399792
IDP.0675	SCZ	54	0.00482875	0.0458082	0.916049	-0.0657797	0.237378	0.782795	0.00545087	0.0333151	0.870034	54	0.00644249	0.0456491	0.887767	90	0.00421439	0.0389002	0.913727	0.0282187	0.0340718	0.40755
IDP.1980	SCZ	36	0.00250497	0.0381618	0.947664	-0.309452	0.200756	0.132468	0.00260484	0.0405697	0.948806	40	-0.000169215	0.0360199	0.996252	72	-0.0131435	0.0405075	0.745582	0.02591	0.0356303	0.467109
IDP.0015	SCZ	47	0.00795497	0.047991	0.868346	-0.274821	0.217127	0.212129	0.00883257	0.0342281	0.796368	52	0.013817	0.0468175	0.767898	93	0.0217071	0.0393938	0.581614	0.0228523	0.032381	0.480354
IDP.0664	SCZ	45	-0.0601479	0.0377419	0.111011	0.0971349	0.175593	0.583005	-0.063151	0.0401799	0.116019	46	-0.0638511	0.039423	0.105309	79	-0.0474843	0.0407358	0.24375	0.0255128	0.0363465	0.482721
IDP.0366	SCZ	52	-0.0312423	0.0318852	0.327166	-0.0604841	0.0499147	0.231304	-0.0327665	0.0257071	0.202448	59	-0.044596	0.0350843	0.20369	85	-0.0363662	0.0349782	0.298487	-0.0192932	0.0287504	0.502183
IDP.1039	SCZ	39	-0.0562584	0.044846	0.209667	0.0269683	0.223791	0.904734	-0.0612362	0.0393591	0.119747	42	-0.0644269	0.0457044	0.158645	67	-0.0520454	0.0432118	0.228425	-0.0241389	0.0367687	0.511499
IDP.0024	SCZ	41	0.0480603	0.0438088	0.272621	0.49979	0.190426	0.0123233	0.0514826	0.0406181	0.204984	44	0.0474572	0.0437155	0.277659	64	0.0317341	0.0473223	0.502479	-0.0224572	0.0385278	0.559972
IDP.1991	SCZ	56	-0.0830403	0.0468221	0.076141	-0.223948	0.171092	0.1961	-0.0952234	0.0303427	0.00169951	69	-0.0940437	0.0473468	0.0470031	108	-0.0804151	0.0383641	0.0360732	0.0140386	0.029592	0.635212
IDP.1530	SCZ	34	0.0217593	0.0454834	0.632365	0.189084	0.170505	0.27571	0.023144	0.0420084	0.581677	40	0.0355469	0.0408267	0.38393	74	0.0433701	0.0387076	0.26252	-0.0168119	0.0358567	0.639168
IDP.0193	SCZ	45	0.00516571	0.0447072	0.908013	0.198014	0.199167	0.325683	0.0056217	0.0335291	0.866846	59	0.0417289	0.0408265	0.306732	94	0.0371193	0.0366238	0.310808	-0.0131198	0.0284316	0.644476
IDP.2086	SCZ	44	0.0237637	0.0431513	0.581834	-0.0894551	0.222878	0.690187	0.0257548	0.0375618	0.492924	55	0.0442717	0.0415804	0.287	77	0.0607913	0.0426513	0.154068	0.0145775	0.0321924	0.650675
IDP.0346	SCZ	44	-0.00244147	0.0379771	0.948741	-0.000147037	0.108025	0.99892	-0.00261116	0.0347369	0.94008	48	0.00899812	0.0398844	0.821509	82	0.0260729	0.0388794	0.502468	-0.0158602	0.0352295	0.652569
IDP.0012	SCZ	45	0.0154586	0.0416057	0.710228	-0.408039	0.214553	0.063909	0.0166413	0.0382856	0.663808	50	-0.000647313	0.0404867	0.987244	84	0.00229445	0.040128	0.954403	0.0147182	0.0341082	0.666095
IDP.2019	SCZ	42	-0.0840873	0.0542695	0.121276	-0.11139	0.257045	0.66709	-0.0970287	0.0343109	0.00468502	50	-0.120107	0.0555495	0.0306054	82	-0.0549013	0.0438644	0.21071	-0.0136805	0.0327384	0.67604
IDP.1495	SCZ	47	0.0144544	0.0433205	0.738634	-0.00934891	0.2026	0.963399	0.0157563	0.0347026	0.649802	54	0.00944581	0.0421478	0.82267	86	0.0168202	0.0366443	0.646226	-0.0124594	0.0318924	0.696042
IDP.1467	SCZ	39	-0.0490934	0.0471605	0.297883	-0.305818	0.214926	0.163142	-0.0539619	0.0384696	0.160702	46	-0.0670425	0.0439887	0.127487	71	-0.0527756	0.0409631	0.197617	0.0137905	0.0361802	0.703083
IDP.1995	SCZ	48	-0.00533356	0.044824	0.905284	0.0168531	0.192067	0.930459	-0.00588863	0.0342617	0.863538	58	-0.00442905	0.043354	0.91863	83	0.0105943	0.0408932	0.79558	0.012714	0.0334683	0.704034
IDP.1541	SCZ	44	0.0190107	0.056319	0.735699	0.377705	0.228723	0.106124	0.022364	0.0351981	0.525183	50	0.0679643	0.0507456	0.180468	98	0.0343426	0.0376177	0.361274	-0.0128482	0.0342163	0.707289
IDP.1494	SCZ	49	-0.00564844	0.0512956	0.912318	0.112276	0.327437	0.733208	-0.00640581	0.0346365	0.853273	54	0.000601594	0.0481653	0.990035	89	-0.0034984	0.0398288	0.930007	0.0121512	0.0333385	0.715501
IDP.0709	SCZ	36	0.00213761	0.0482871	0.96469	-0.169274	0.217156	0.441075	0.00228674	0.0431961	0.957781	39	0.00693537	0.0418257	0.868302	66	-0.0247382	0.0463072	0.59319	-0.00993211	0.039975	0.80378
IDP.0194	SCZ	53	0.0357272	0.0231153	0.122199	0.0407539	0.034561	0.243796	0.0365648	0.0229446	0.111022	67	0.117598	0.0256755	4.64596e-06	96	0.121119	0.0281773	1.71994e-05	-0.00522254	0.02447	0.830994
IDP.1640	SCZ	43	-0.0844984	0.044465	0.0573894	-0.0704132	0.171136	0.682888	-0.0917612	0.0387026	0.0177433	46	-0.0851795	0.0479471	0.0756453	79	-0.0482586	0.040686	0.235573	0.00644049	0.0347967	0.853159
IDP.1982	SCZ	31	-0.145688	0.0462263	0.00162361	0.0195747	0.161449	0.904334	-0.153429	0.0470784	0.00111803	31	-0.154977	0.0515397	0.00263884	67	-0.0606684	0.0469119	0.195928	0.0082155	0.046186	0.858818
IDP.1999	SCZ	46	0.0144235	0.0401485	0.719405	0.0539248	0.179069	0.764727	0.0154928	0.0375658	0.680033	48	0.0186437	0.0393749	0.635862	75	0.0218165	0.0408609	0.593396	-0.00593922	0.0341529	0.861944
IDP.0210	SCZ	67	-0.031715	0.0342634	0.354641	0.117465	0.139538	0.402978	-0.0338285	0.0303139	0.264448	78	-0.00857964	0.0329175	0.794369	104	0.00770558	0.0332426	0.816695	0.00440922	0.0279631	0.874709
IDP.1612	SCZ	37	-0.0298785	0.0457141	0.513374	-0.0883069	0.190404	0.645672	-0.0321431	0.0403571	0.42576	43	-0.00502459	0.0474616	0.915688	79	0.0231467	0.0411607	0.573878	0.00100466	0.0371522	0.978427
IDP.1546	SCZ	53	-0.075004	0.0259053	0.00378782	-0.0480471	0.0408397	0.244865	-0.0835934	0.025616	0.00110112	65	-0.0934196	0.034835	0.00732327	103	-0.0807259	0.0326747	0.0134889	1.95284e-05	0.0272161	0.999427

## Sheet: Table S9
Supplementary Table 9: Reverse Mendelian randomization results (SCZ on IDPs)
Exposure	Outcome	IVW, MR-Egger, RAPS										MR-LDP				MERLIN
		N.snps	IVW.beta	IVW.se	IVW.pval	Egger.beta	Egger.se	Egger.pval	Raps.beta	Raps.se	Raps.pval	N.snps	LDP.beta	LDP.se	LDP.pval	N.snps	betaA	betaA.se	betaA.pval	betaI	betaI.se	betaI.pval
SCZ	IDP.0664	58	-0.0811171	0.0266201	0.00230969	-0.147379	0.0703969	0.0363006	-0.0841695	0.0220102	0.000131242	91	-0.0968855	0.0239004	5.041e-05	104	-0.0650484	0.0181307	0.000333551	-0.06786	0.018062	0.000171923
SCZ	IDP.0015	58	-7.91801e-05	0.0264495	0.997611	-0.0844871	0.0381385	0.0267416	-8.21925e-05	0.021534	0.996955	91	-0.019975	0.022942	0.383934	104	-0.0530045	0.0272246	0.0515423	-0.04927	0.0139235	0.000402219
SCZ	IDP.2019	58	-0.00829985	0.0231765	0.720258	-0.0181975	0.0951881	0.849081	-0.00852074	0.0222561	0.701831	91	-0.021416	0.0197945	0.279287	104	-0.0202547	0.0224144	0.366181	0.0464572	0.0139891	0.000897082
SCZ	IDP.0210	58	0.00465314	0.023197	0.841018	0.106131	0.0941921	0.264655	0.00478001	0.022041	0.828311	91	0.00218154	0.0204487	0.91504	104	-0.000757902	0.0224498	0.973069	-0.0467812	0.01441	0.00116858
SCZ	IDP.1993	58	-0.0447935	0.0235729	0.0574056	-0.258203	0.0922433	0.00701562	-0.0460499	0.0222527	0.0385073	91	-0.0553129	0.0232586	0.0173989	104	-0.0430171	0.0224875	0.0557559	0.0444698	0.0139994	0.00149039
SCZ	IDP.0208	58	0.00916479	0.0244964	0.708309	0.135325	0.0990458	0.17731	0.00946361	0.0219834	0.66684	91	0.00737933	0.0215466	0.731988	104	-0.00698307	0.0233219	0.764618	-0.0409342	0.0132776	0.00204962
SCZ	IDP.1640	58	-0.0607728	0.0235976	0.0100129	-0.219952	0.0944044	0.0234418	-0.0624824	0.0222718	0.00502454	91	-0.0807386	0.0228281	0.000404993	104	-0.0445579	0.0233437	0.0562903	0.0400032	0.0139288	0.00407898
SCZ	IDP.1980	58	-0.0102565	0.0223978	0.647007	-0.108362	0.0909984	0.23875	-0.0105205	0.0222663	0.636579	91	-0.030226	0.0201319	0.133253	104	-0.0346751	0.0218468	0.112469	0.0370256	0.0133873	0.00567971
SCZ	IDP.0024	58	-0.0151676	0.0247493	0.539977	-0.0789809	0.101275	0.438752	-0.0157134	0.0215596	0.466103	91	-0.0259034	0.0208794	0.214746	104	-0.0240076	0.0218038	0.270864	0.0288469	0.0139963	0.0392993
SCZ	IDP.1541	58	0.0761904	0.0226986	0.000789037	0.209176	0.0593555	0.0004249	0.0784113	0.0222634	0.000428335	91	0.0902794	0.0228449	7.75547e-05	104	0.0793905	0.0220512	0.000396037	0.0269852	0.0137261	0.0493017
SCZ	IDP.1999	58	-0.0553217	0.0255409	0.0303111	-0.235737	0.101914	0.0244143	-0.0572657	0.0221975	0.00988492	91	-0.0648794	0.0232235	0.00521091	104	-0.0433725	0.0225012	0.0539091	-0.0262359	0.0137718	0.0567748
SCZ	IDP.0193	58	0.00372506	0.022752	0.869948	0.0501208	0.0931795	0.592781	0.00382283	0.0220529	0.862377	91	0.0139766	0.0196025	0.475846	104	0.00745362	0.022127	0.736225	-0.0258938	0.0138331	0.0612235
SCZ	IDP.1039	58	0.0284697	0.0234829	0.225375	0.214095	0.0929413	0.0249831	0.0293071	0.0220252	0.183316	91	0.0385731	0.0213979	0.0714419	104	0.0302735	0.0234016	0.195786	0.0250925	0.0135832	0.0647001
SCZ	IDP.0700	58	-0.0488251	0.0215309	0.0233488	-0.0821842	0.0876058	0.352215	-0.0498459	0.0221328	0.0243139	91	-0.0612965	0.0195088	0.00167799	104	-0.0352685	0.0225452	0.117736	-0.0218918	0.0139541	0.116685
SCZ	IDP.0366	58	0.000903908	0.0232765	0.969023	-0.0169607	0.0955207	0.859708	0.00092903	0.0220354	0.966371	91	0.0132655	0.0197711	0.502249	104	-0.00689981	0.021995	0.75375	-0.0210165	0.0137885	0.127457
SCZ	IDP.1542	58	0.0552227	0.0255382	0.0305904	0.233394	0.101983	0.0258999	0.057131	0.022192	0.0100416	91	0.0677518	0.0215255	0.00164667	104	0.0691449	0.0238566	0.00375131	0.0221521	0.0146534	0.1306
SCZ	IDP.1612	58	-0.0245911	0.0217316	0.257809	-0.134932	0.0884747	0.132865	-0.0251603	0.0222998	0.259204	91	-0.0251458	0.0217847	0.248382	104	-0.0148501	0.0220472	0.50059	0.0203511	0.0138176	0.140794
SCZ	IDP.1991	58	-0.0931727	0.026106	0.000358316	-0.218224	0.0504051	1.49508e-05	-0.0966057	0.0222113	1.36517e-05	91	-0.101465	0.0267352	0.00014754	104	-0.0837208	0.0235597	0.000380054	-0.0191035	0.0135443	0.158407
SCZ	IDP.0191	58	-0.0267628	0.0242919	0.270584	0.00404971	0.0996299	0.967721	-0.0276028	0.0220062	0.209726	91	-0.0358409	0.0211364	0.0899434	104	-0.0381227	0.0228826	0.0957115	-0.0186152	0.0137912	0.177084
SCZ	IDP.2090	58	-0.0537646	0.0227372	0.0180493	0.00205069	0.093075	0.9825	-0.0551358	0.0223019	0.0134266	91	-0.0568736	0.0214176	0.00792006	104	-0.0323454	0.0227868	0.15576	0.0178093	0.0141749	0.208973
SCZ	IDP.1530	58	-0.0103226	0.0234691	0.660056	0.101836	0.0951513	0.289095	-0.010611	0.0222437	0.63334	91	0.00718705	0.0207395	0.728938	104	0.00375599	0.021348	0.86034	-0.0166271	0.0141317	0.239361
SCZ	IDP.1992	58	-0.090313	0.0260588	0.000528782	-0.198867	0.0482154	3.71437e-05	-0.0933491	0.022241	2.70282e-05	91	-0.10235	0.0237924	1.69408e-05	104	-0.0923672	0.0234094	7.95554e-05	-0.0162444	0.0138838	0.241993
SCZ	IDP.1613	58	-0.00260969	0.021732	0.904416	-0.0615729	0.088477	0.489357	-0.00264843	0.0223885	0.905835	91	-0.00577696	0.0196557	0.768828	104	0.000964833	0.0222721	0.965446	0.0152802	0.0140589	0.277093
SCZ	IDP.0364	58	-0.0262278	0.0215302	0.223154	-0.00580891	0.0876046	0.947369	-0.0268081	0.0221103	0.225332	91	-0.00205295	0.0195866	0.916523	104	-0.0162295	0.0222123	0.464992	0.0148708	0.0139595	0.286748
SCZ	IDP.1467	58	0.0736443	0.0297273	0.0132371	0.510698	0.106185	1.1801e-05	0.0771685	0.0220567	0.00046764	91	0.0779181	0.0278019	0.00506899	104	0.0675842	0.0264448	0.0105983	-0.0146482	0.0139183	0.292598
SCZ	IDP.0359	58	-0.0506299	0.0215302	0.0186939	0.0609431	0.0876036	0.489513	-0.0517786	0.0221281	0.0192864	91	-0.0497939	0.0196116	0.0111171	104	-0.0375349	0.0214678	0.0803892	-0.012011	0.013561	0.37578
SCZ	IDP.1494	58	0.0363843	0.0250882	0.146987	0.156809	0.101698	0.12873	0.0375742	0.0222046	0.0906111	91	0.0568818	0.0243661	0.0195715	104	0.0302255	0.0232166	0.192952	-0.0118286	0.0139732	0.397262
SCZ	IDP.0675	58	-0.0794433	0.0281865	0.00482509	-0.0814654	0.115709	0.484315	-0.0826964	0.0219733	0.000167552	91	-0.0990499	0.0262599	0.000162005	104	-0.0760137	0.0221808	0.000610285	-0.0117801	0.0139292	0.397713
SCZ	IDP.2038	58	-0.0137	0.0264517	0.60451	0.0779433	0.107918	0.473149	-0.0141909	0.0221603	0.521931	91	-0.0116666	0.023027	0.612401	104	-0.00805215	0.0238999	0.736183	-0.0118811	0.0140865	0.398985
SCZ	IDP.2057	58	0.00751462	0.0265844	0.777429	0.109975	0.108276	0.314145	0.00779735	0.0221365	0.724659	91	0.0139758	0.0239195	0.55903	104	-0.000132435	0.0239985	0.995597	-0.0112416	0.0138354	0.416492
SCZ	IDP.2086	58	0.0195687	0.0219606	0.372885	0.201174	0.0884745	0.0268313	0.0200596	0.0222781	0.367897	91	0.0272814	0.0212236	0.198644	104	0.028753	0.0221026	0.193297	0.0111816	0.0141814	0.430424
SCZ	IDP.1457	58	0.0214877	0.0241303	0.373205	0.0364204	0.0990932	0.714604	0.0221385	0.0222153	0.318988	91	0.027241	0.021311	0.201158	104	0.0241191	0.0225338	0.284461	0.0100193	0.0143197	0.484123
SCZ	IDP.1995	58	-0.0331357	0.0248387	0.182193	-0.252983	0.0974163	0.0119937	-0.0341875	0.0221995	0.123557	91	-0.0224731	0.0227846	0.323972	104	-0.0288762	0.0228662	0.206649	0.00948902	0.0140038	0.498023
SCZ	IDP.1495	58	0.0561822	0.0273249	0.0397748	0.220318	0.109924	0.0498862	0.0583565	0.0221587	0.00844917	91	0.0769799	0.0258998	0.00295651	104	0.0537851	0.024368	0.0273002	0.00832057	0.013927	0.550214
SCZ	IDP.1607	58	0.00514513	0.0250275	0.83712	0.0811716	0.102263	0.43069	0.00531613	0.0221832	0.810604	91	0.0091965	0.0228325	0.687109	104	-0.00148161	0.0231954	0.94907	-0.00790145	0.0142815	0.580083
SCZ	IDP.0194	58	-0.0130134	0.0291201	0.654956	-0.0544544	0.1194	0.650106	-0.0135962	0.0218549	0.533867	91	-0.00812898	0.0252624	0.747618	104	-0.00646593	0.0248223	0.794487	-0.00723404	0.0139134	0.60311
SCZ	IDP.2000	58	-0.0141618	0.023438	0.545695	-0.077867	0.0958716	0.420116	-0.0145424	0.0222549	0.513468	91	-0.0210701	0.0209062	0.313532	104	-0.0211567	0.0230519	0.35873	0.00561138	0.014097	0.690589
SCZ	IDP.0211	58	-0.0315492	0.0283063	0.265037	-0.0807712	0.115999	0.489115	-0.032885	0.0218881	0.13299	91	-0.024107	0.0245675	0.326467	104	-0.0262591	0.0234755	0.263321	-0.00527812	0.0135244	0.696339
SCZ	IDP.2020	58	-0.0261054	0.0253568	0.303235	0.120662	0.102169	0.24259	-0.026974	0.0221926	0.224194	91	-0.0251313	0.0219164	0.251509	104	-0.0205399	0.0242805	0.397583	0.00528364	0.0138361	0.702555
SCZ	IDP.0346	58	-0.0146209	0.0215301	0.497082	0.0364091	0.0876044	0.679285	-0.0149614	0.0220857	0.498136	91	0.00248488	0.0193917	0.898037	104	-0.0181519	0.0231454	0.43289	0.00464603	0.0133981	0.728765
SCZ	IDP.0709	58	-0.0353248	0.0269603	0.190111	-0.0351246	0.110677	0.752149	-0.0366528	0.0219519	0.0949804	91	-0.0393188	0.0239282	0.100342	104	-0.0379607	0.0233026	0.103306	-0.00463691	0.0140169	0.740789
SCZ	IDP.1982	58	0.00473275	0.0224599	0.833106	0.171115	0.0893576	0.0606124	0.00486008	0.0222512	0.827103	91	0.0128018	0.0201282	0.524767	104	8.72919e-05	0.0221908	0.996861	-0.00261293	0.0134208	0.845633
SCZ	IDP.0174	58	-0.000497115	0.0267331	0.985164	0.23592	0.104786	0.0282994	-0.000516368	0.0219177	0.981204	91	0.0129771	0.0243862	0.594624	104	0.00768845	0.0236132	0.744727	-0.00165098	0.013656	0.903772
SCZ	IDP.0403	58	-0.0149243	0.0229156	0.514871	0.120074	0.0922113	0.198192	-0.0153403	0.022043	0.486475	91	-0.0030972	0.0203441	0.878997	104	-0.0147948	0.0229572	0.519282	-0.00169733	0.014059	0.903906
SCZ	IDP.1546	58	0.0175192	0.0288964	0.544332	0.0139899	0.118693	0.906595	0.0182875	0.0220708	0.40734	91	0.00481499	0.0245787	0.844687	104	0.0144577	0.0233175	0.535234	-0.00148808	0.0137504	0.91382
SCZ	IDP.2011	58	-0.0468004	0.021928	0.0328201	0.0016626	0.0898216	0.985298	-0.0479123	0.0223058	0.0317158	91	-0.0341288	0.0208915	0.102339	104	-0.021844	0.0224487	0.330521	0.00135809	0.0141236	0.923395
SCZ	IDP.0012	58	-0.0206992	0.0253275	0.413778	-0.126434	0.103004	0.224782	-0.0214047	0.0215769	0.321189	91	-0.0248046	0.0218377	0.256016	104	-0.0368975	0.0232799	0.112977	0.000921683	0.0136466	0.946152
SCZ	IDP.0651	58	-0.0267433	0.0215301	0.214187	-0.053075	0.0879386	0.548583	-0.0274333	0.0220587	0.213628	91	-0.0173187	0.0195947	0.37678	104	-0.0332633	0.0225611	0.140385	-0.000221002	0.0135994	0.987034
SCZ	IDP.1616	58	0.0223132	0.0232161	0.336497	0.0513546	0.0952729	0.592006	0.0229288	0.0222468	0.302703	91	0.0213584	0.0228455	0.349836	104	0.00908848	0.0229007	0.691467	-2.31678e-05	0.0139994	0.99868

[truncated: 8 more sheets: Table S10, Table S11, Table S12, Table S13, Table S14, Table S15, Table S16, Table S17]
